# Supplementary material for: A longitudinal footprint of genetic epilepsies using automated electronic medical record interpretation
Source: PubMed Central journal article supplement (PMC7708303; doi:10.1038/s41436-020-0923-1), 2020-08-10

## **A longitudinal footprint of genetic epilepsies using automated electronic medical record interpretation**

Shiva Ganesan, MS, Peter D. Galer, MSc, Katherine L. Helbig, MS, Sarah E. McKeown, MS, Margaret O'Brien, BS, Alexander K. Gonzalez, MS, MBA, Alex S. Felmeister, PhD, Pouya Khankhanian, MD, Colin A. Ellis, MD, and Ingo Helbig, MD

### Supplementary Data

|                                                                            |    |
|----------------------------------------------------------------------------|----|
| Supplementary Data.....                                                    | 1  |
| Study cohort .....                                                         | 2  |
| Window of EMR usage .....                                                  | 2  |
| Rationale for HPO dictionary .....                                         | 3  |
| Delineating syndromes versus symptoms within the HPO dictionary.....       | 4  |
| Effect of bin width on phenotypic associations.....                        | 5  |
| Effect of increasing bin width to 6 months, 12 months, and 24 months ..... | 5  |
| Effect of decreasing bin width to 1 week, 1 month, and 6 weeks.....        | 7  |
| Predictive power of gene-phenotype associations in <i>SCN1A</i> .....      | 8  |
| Effect of gene grouping .....                                              | 10 |
| Additional supplementary figures as cited in main manuscript.....          | 17 |
| Supplementary References .....                                             | 19 |

### Study cohort

Using the EGRP protocol, patients were consented for use of bio samples, existing genetic data, and clinical data including data derived from the Electronic Medical Records (EMR) in a research context. Informed consent for participation in this study was obtained from subjects themselves or parents of all probands in agreement with the Declaration of Helsinki, and the study was completed per protocol with local approval by the local institutional review board (IRB). For research enrollment, individuals and families were approached in an inpatient setting (neurology floor, epilepsy monitoring unit, pediatric intensive care unit, and neonatal intensive care unit) and outpatient setting (epilepsy clinic and neurogenetics/epilepsy genetics clinic). For the current study, we also included 49 individuals without epilepsy, mainly when individuals had genetic etiologies typically associated with seizures, such as *STXBP1* or *SCN2A*, and were seen in the neurogenetics clinic of the Children's Hospital of Philadelphia.

### Window of EMR usage

To assess phenotypic data, the current study used electronic medical record (EMR) data derived from the EPIC (1979 Milky Way, Verona, WI 53593) database at Children's Hospital of Philadelphia, extracting encounter diagnoses and problem lists for all individuals included in the study. In order to capture the entire duration of medical care that individuals received within the CHOP Network, we also extracted all medication prescriptions and refills. At any given time point, the proportion of individuals with EMR usage without assigned phenotype terms reflects individuals followed within the healthcare network for non-neurological issues prior to developing neurological problems, for example routine pediatric care. The proportion of individuals with EMR use without assigned neurology-related phenotype terms was 0.82 (537/658 individuals) at birth and decreased over time.

### Rationale for HPO dictionary

As the HPO is an ontology of phenotypic findings, we mapped Intelligent Medical Objects (IMO) terms related to diseases and epilepsy syndromes (e.g. “Dravet Syndrome” and “Juvenile Myoclonic Epilepsy”) to high-level terms in the HPO (e.g. “Abnormality of central nervous system”) to avoid false positive annotation. For example, patients with “Dravet Syndrome” frequently have myoclonic seizures (HP:0002123), but a significant subset of individuals do not have this seizures type at the time point that the syndromal diagnosis is coded in the EMR. Accordingly, the HPO term for myoclonic seizures was not inferred from the epilepsy syndrome diagnosis but was only added if listed separately on the merged problem and diagnosis list.

A method that we refer to as “propagation” was utilized during the assignment of HPO terms to participants. In addition to HPO terms that were assigned to a participant from the merged diagnosis and problem list, all higher-level HPO terms were added for a particular time point for each individual. For example, if Individual 1 was assigned the term “Focal impaired awareness seizure” (HP:0002384), this individual would also be assigned the following higher-level terms: “Focal-onset seizure” (HP:0007359), “Seizures” (HP:0001250), “Abnormality of nervous system physiology” (HP:0012638), “Abnormality of the nervous system” (HP:0000707), “Phenotypic abnormality” (HP:0000118), and “All” (HP:0000001). Propagation was performed to capture phenotypic similarity between individuals if related, but not identical, HPO terms are assigned. In the example above, Individual 1 with the assigned term “Focal-onset seizure” (HP:0007359) and Individual 2 with the assigned term “Absence seizure” (HP:0002121) would both have “Seizures” (HP:0001250) and all higher-level terms assigned as shared ancestral terms, capturing the Most Informative Common Ancestor (MICA) terms for both individuals <sup>1</sup>.

The HPO version used for this study was HPO version 1.2 (release format-version: 1.2; data-version: releases/2017-12-12; downloaded on 3/10/18).

### Delineating syndromes versus symptoms within the HPO dictionary

Given that problem and diagnosis lists in the EMR only capture some degree of the complete phenotypic information, we expected a substantial amount of clinical information related to patient similarity to be excluded by our framework. Some of this omission was expected, as we purposefully either ignored syndrome-based terms or mapped them to high-level concepts in the ontology. For example, we mapped terms such as “*PURA*-related neurodevelopmental disorder”<sup>2,3</sup> to “CNS abnormality” (HP:0000707), a relatively high-level and uninformative term. This mapping was based on our decision to maintain a strict separation between “symptoms” and “syndromes” to avoid diagnostic terms associated with epilepsy syndromes that artificially inflate the association with the underlying genetic etiologies even though specific features were not observed in all individuals.

In our study, delineating syndromes versus symptoms was particularly relevant in *SCN1A*-related epilepsies, where patients were frequently labelled with “Dravet Syndrome” rather than using descriptions of the clinical symptoms. To remain constant in our approach, we only coded “Dravet Syndrome” to the higher-level term “CNS abnormality” (HP:0000707). Accordingly, even though the clinical history of Dravet Syndrome, with fever-related episodes of status epilepticus or hemiclonic seizures, is one of the most significant gene-phenotype associations in the genetic epilepsies<sup>4,5</sup>, the first significant association with specific HPO terms occurred only at 1.0 years. From a clinical standpoint, patients typically have frequent prolonged fever-related seizures in the first year of life that initially lead to the genetic diagnosis. This discrepancy suggests that our current methods to map phenotypic data from EMR is imperfect and incompletely represents some aspects of the natural history. We expect that with improvements in technologies to map clinical data, some of these issues will be overcome.

### Effect of bin width on phenotypic associations

For our current study, we chose an arbitrary bin width of 3 months assuming that this bin width represents an adequate trade-off between the overall number of comparisons and sufficient granularity to assess changes in phenotypes. While our main analysis is based on a 3-months bin width, we subsequently explored the effect of widening and shortening the bin width on the phenotypic associations observed in our study. In summary, we find that the majority of gene-phenotype associations remain unchanged. However, some additional associations may emerge that could be beneficial during specific age groups.

### Effect of increasing bin width to 6 months, 12 months, and 24 months

We expanded the bin width and assessed the gene-phenotype associations at all time intervals compared to the 3-months binning (**Figure S1**). We observed that while majority gene-phenotype associations at each time point remain correlated, the overall correlation between 3 month and the selected bin decrease with larger bin width.

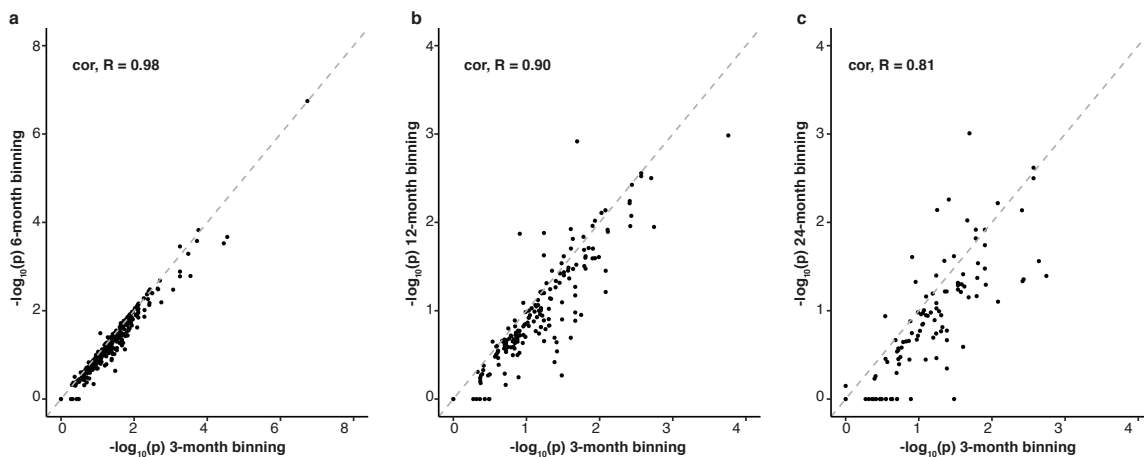

**Figure S1.** Gene-phenotype associations comparing the binning for 3 months versus 6 months (a), 12 months (b), and 18 months (c). Values for gene-phenotype associations are plotted as  $-\log_{10}(p\text{-values})$  comparing values for 3 months (y-axis) and the other time intervals on the x-axis. With increasing bin width, the correlation between the gene-phenotype associations at 3 month and the selected bin width become less prominent. However, the majority of gene-phenotype associations remain correlated.

We then examined gene-phenotype associations where the 3-months association deviated from other time intervals most prominently (Figure S2). When comparing the 3-months and 24-months binning, we observed that the association of *TBC1D24* and symptomatic seizures (HP:0011145) from birth to three months represented one of the most prominent outliers and was no longer significant with the 24-months binning. The reason for this drop in association was the higher frequency of this HPO term in the overall cohort at birth to three months, which resulted in this reduction of significance.

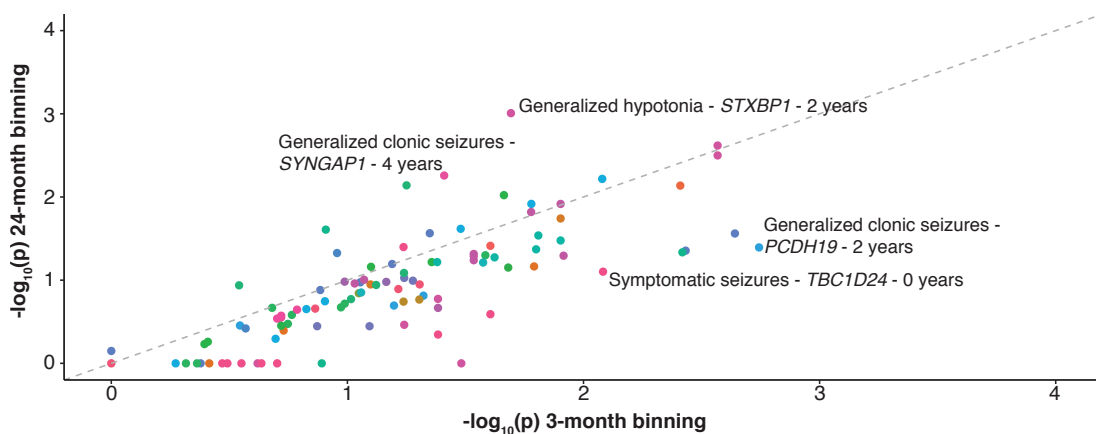

**Figure S2.** Gene-phenotype associations comparing the binning for 3 months versus 24 months, highlighting outliers that indicate gene-phenotype associations that are different between both binning sizes. Dots in the upper left reflect associations that become stronger with the 24 months bin size, the lower right corner captures gene-phenotype associations that are more prominent in the 3-months bin but decrease in significance with the 24-months bin. Dots represent  $-\log_{10}(p\text{-values})$  of gene-phenotype associations.

No single gene-phenotype association at either time prominently emerged as a new association, but some existing associations became stronger. The association of generalized hypotonia (HP:0001290) with *STXBP1* became more prominent as the larger binning was able to capture clinical data from individuals who had EMR usage at non-overlapping time intervals, e.g. patients who were followed at our institution at non-overlapping ages. Capturing individuals with non-overlapping EMR usage window represents one advantage of adjusting the binning window, especially for individuals presenting beyond infancy.

## Effect of decreasing bin width to 1 week, 1 month, and 6 weeks

We subsequently decreased the bin width to 6 weeks, 1 month, and 1 week (**Figure S3**). Overall, we observed that none of the associations at 3 months became more significant as indicated by the lack of points in the lower right quadrant in **Figure S4**. However, a number of gene-phenotype associations became more significant, most prominently the association of *KCNQ2* with seizures in the first time interval (birth to one month). This increased association of seizures with *KCNQ2* follows the natural history of *KCNQ2*-related seizures that typically occur in two distinct phenotypic groups, benign neonatal seizures (OMIM121200) and *KCNQ2* encephalopathy (OMIM613720). Both disease groups start with seizures approximately at the same age (5 days), but seizures only persist in the subset of individuals with *KCNQ2* encephalopathy. It is therefore reasonable to expect that smaller binning around the time when all individuals have seizures capture the strong association, as is seen in *KCNQ2*.

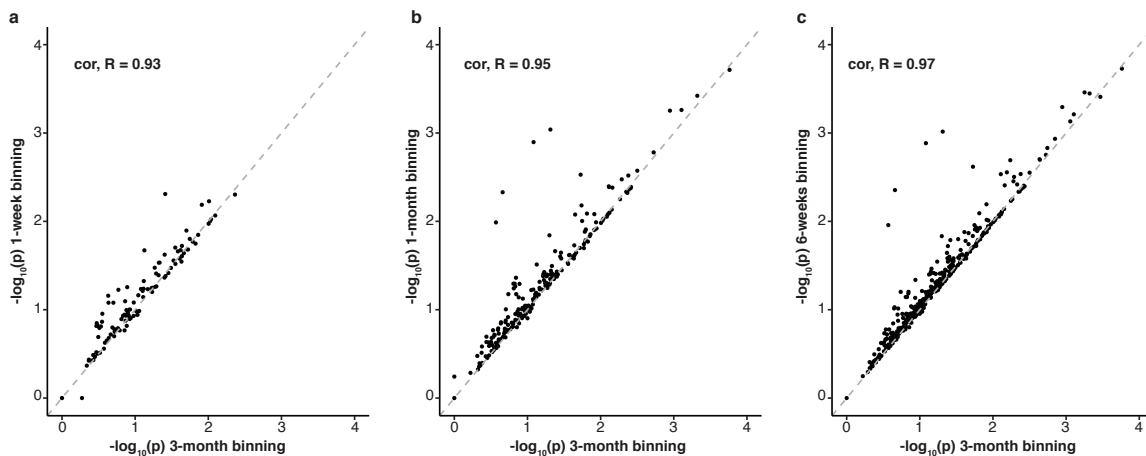

**Figure S3.** Gene-phenotype associations comparing the binning for 3 months versus 1 week (**a**), 1 month (**b**), and 6 weeks (**c**). Values for gene-phenotype associations are plotted as  $-\log_{10}(\text{p-values})$  comparing values for 3 months (x-axis) and the other time intervals on the y-axis. With increasing bin width, the correlation between the gene-phenotype associations at 3-month and the selected bin width become less prominent. However, the majority of gene-phenotype associations remain correlated.

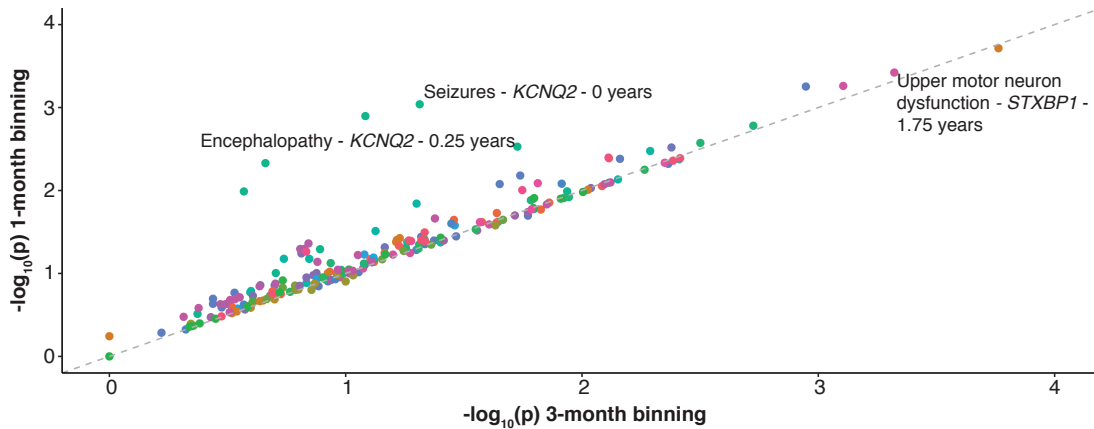

**Figure S4.** Gene-phenotype associations comparing the binning for 3 months versus 1 month, highlighting outliers that indicate gene-phenotype associations that differ between both binning sizes. Dots in the lower left reflect associations that become stronger with the 3-months bin size; the upper left captures gene-phenotype associations that are more prominent in the 1-months bin but decrease in significance with the 24-months bin. Dots represent  $-\log_{10}(\text{p-values})$  of gene-phenotype associations. The most prominent change is seen with the association of seizures and *KCNQ2*, which increases in significance with smaller bins.

### Predictive power of gene-phenotype associations in *SCN1A*

In order to assess whether gene-phenotype association may be predictive of future phenotypic features, we assessed the association between phenotypes at a given time interval ( $t_1$ ) and the subsequent time interval ( $t_2$ ). A high odds ratio (OR) for phenotype  $HP_1$  at  $t_1$  and phenotype  $HP_2$  at  $t_2$  suggests that that  $HP_1$  is predictive of  $HP_2$  at the subsequent time interval. We compared the OR for  $HP_1$  at  $t_1$  and phenotype  $HP_2$  at  $t_2$  in individuals with disease causing variants in *SCN1A* to the remainder of the cohort, assessing all pair-wise combination of HPO terms at all 100 time intervals. We then assessed the  $t_1$ - $HP_1$ / $t_2$ - $HP_2$  combinations where the 95% CI intervals for the OR did not overlap. Of the 260,100 comparisons, only 11 comparisons had non-overlapping ORs for the *SCN1A* cohort and the remainder of the cohort. Of these comparisons 5/11 had non-informative associations between parent and child terms (e.g. “Neurodevelopmental abnormality”; HP:0012759 and “Global developmental delay”; HP:0001263) or modifier terms, **the remaining 6 associations indicated scenarios where HPO terms had a high OR in the remaining cohort but a low OR in the *SCN1A* cohort (Table S1) between 1.75 and 2.75 years.**



| <b>t<sub>1</sub></b><br><b>(years)</b> | <b>t<sub>2</sub></b><br><b>(years)</b> | <b>HPO term at t<sub>1</sub></b>                | <b>HPO term at t<sub>2</sub></b>                | <b>OR <i>SCN1A</i></b><br><b>(95% CI)</b> | <b>OR cohort</b><br><b>(95% CI)</b> |
|----------------------------------------|----------------------------------------|-------------------------------------------------|-------------------------------------------------|-------------------------------------------|-------------------------------------|
| 1.75                                   | 2                                      | Focal-onset seizure<br>HP:0007359               | Neurodevelopmental<br>abnormality<br>HP:0012759 | <b>0</b><br>(0-1.45)                      | <b>3.71</b><br>(1.60-9.42)          |
| 1.75                                   | 2                                      | Focal-onset seizure<br>HP:0007359               | Neurodevelopmental<br>delay<br>HP:0012758       | <b>0</b><br>(0-1.45)                      | <b>3.96</b><br>(1.71-10.04)         |
| 2.25                                   | 2.5                                    | Focal-onset seizure<br>HP:0007359               | Neurodevelopmental<br>abnormality<br>HP:0012759 | <b>0.08</b><br>(0.00-1.34)                | <b>3.88</b><br>(1.70-9.72)          |
| 2.25                                   | 2.5                                    | Focal-onset seizure<br>HP:0007359               | Neurodevelopmental<br>delay<br>HP:0012758       | <b>0.08</b><br>(0-1.34)                   | <b>4.04</b><br>(1.77-10.12)         |
| 2.5                                    | 2.75                                   | Neurodevelopmental delay<br>HP:0012758          | Focal-onset seizure<br>HP:0007359               | <b>0</b><br>(0-0.92)                      | <b>2.64</b><br>(1.28-5.69)          |
| 2.5                                    | 2.75                                   | Neurodevelopmental<br>abnormality<br>HP:0012759 | Focal-onset seizure<br>HP:0007359               | <b>0</b><br>(0-0.92)                      | <b>2.86</b><br>(1.37-6.29)          |

**Table S1.** Comparison of HPO term associations between neighboring bins, assessing the association between HPO terms at bin 1 (t<sub>1</sub>) and bin 2 (t<sub>2</sub>) for combinations of HPO terms, comparing the odds ratios (OR) in the *SCN1A* cohort and the remaining cohort. The table shows the associations where the 95% confidence intervals do not overlap.

The observed associations can be interpreted as follows: Between the age of 1.75 and 2.75 years, there is a strong association between focal seizures and developmental delay in the overall cohort where presence of one phenotype is predictive for the presence of the other phenotype in the next time interval, i.e. three months later. The odds ratios in the wider cohorts for these associations are between 2.5 and 4, suggesting a 2-4 times increased risk of having one phenotype three months later if the other phenotype had been assigned at a given time point. However, this association is not true for individuals with *SCN1A*-related epilepsies, who have a significantly lower risk for either having focal seizures followed by developmental delay or developmental delay followed by focal seizures.

One explanation for this observation is the fact that focal seizures are commonly seen in genetic epilepsies that also have developmental delay as a presenting feature. However, individuals with *SCN1A*-related epilepsies tend to have more generalized seizures and focal seizures when they possess a disease-causing variant in *SCN1A* without prominent developmental features.

It is worth noting that only a very small subset of phenotype associations were captured using this analysis and that *SCN1A* was the most common genetic etiology in our cohort (n=29). Given the relatively modest findings in *SCN1A*, we did not pursue a similar analysis in the other genetic etiologies that were less common.

### Effect of gene grouping

Given the identified gene-phenotype association, we explored whether novel associations emerge when genes are grouped. We grouped genes in the OMIM Early Infantile Epileptic Encephalopathy (EIEE) phenotypic series (230 genes, 29 genes in the cohort with at least one individual, a total of 125 individuals), voltage gated ion channels as group by Gene Ontology (GO) term GO:0005216 (688 genes, 24 genes in 96 individuals), and all genetic etiologies seen in our cohort (102 genes, 232 individuals). For prominent gene-phenotype associations, we then compared the frequency in cases and controls across the entire age span.

In brief, we made the following observations when combining genes into groups. When grouping OMIM EIEE genes, we observed stronger associations between genetic etiologies and phenotypes (**Figure S5**) along three major phenotypes, including seizures (HP:0001250), global developmental delay (HP:0001263), and spastic tetraplegia (HP:0002510). These three phenotypic associations occurred in distinct time intervals with seizures in the first three years of life, developmental delay between the ages of 2.5 years and 7 years, and spastic tetraplegia between 7.5 and 15 years. While not all phenotype associations are true for each genetic etiology (for example, individuals with *SCN1A*-related epilepsies typically do not have spastic tetraplegia), this gene grouping delineates three distinct age-related phenotype associations with known OMIM EIEE genes (**Figure S6**).

We observed a related pattern when assessing the effect of grouping ion channel genes, which overlap significantly with the OMIM EIEE genes (**Figures S7, S8**), including an association with encephalopathy (HP:0001298).

When comparing individuals with an explanatory genetic etiology in our cohort (102 distinct genetic etiologies in a total of 232 individuals), we observed a strong association with global developmental delay (HP:0001263) in the first years of life (Figures S9, S10), indicating that the presence of any causative genetic etiology increases the risk of developmental issues in our cohort by a factor of two (74% vs. 32% being the highest frequency in both groups).

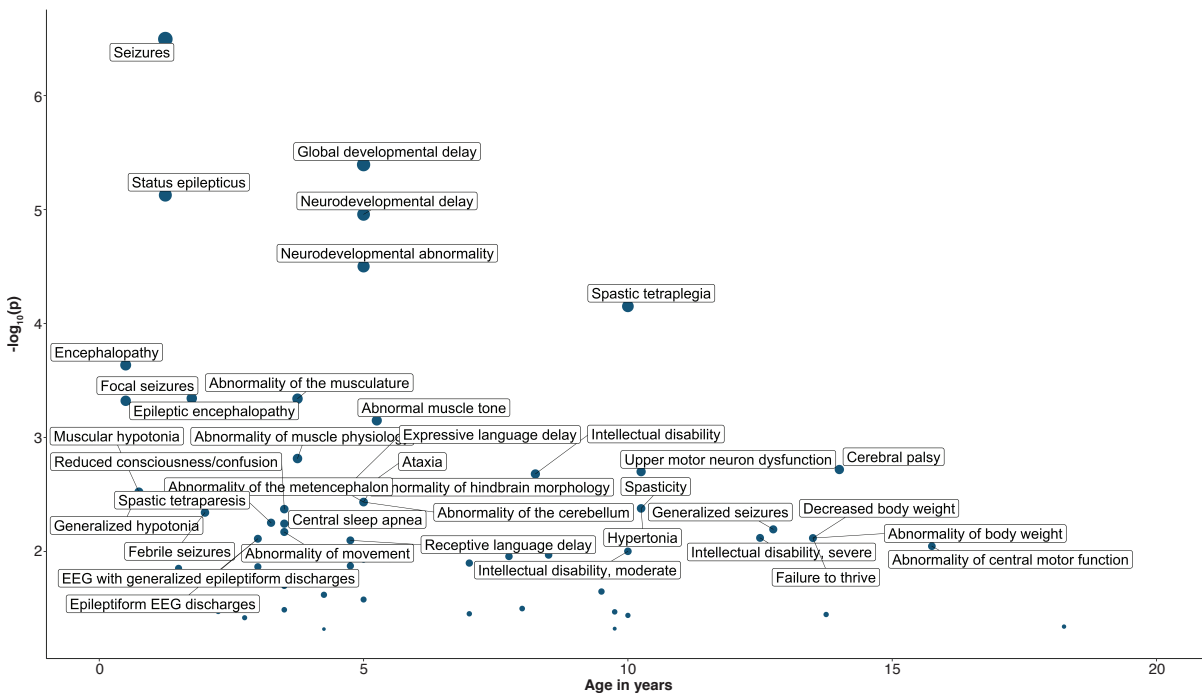

**Figure S5.** The HPO terms associated with 29 genetic etiologies out of the 230 Early Infantile Epileptic Encephalopathy (EIEE) genes as listed in the OMIM phenotypic series are shown with only the time interval with the most significant association for each HPO term displayed. X-axis denotes patient age, y-axis denotes  $-\log_{10}$  of the p-value (Fisher’s exact test). HPO term annotations for the most significant associations with  $-\log_{10}(\text{p-value})$  greater than 2 are shown.

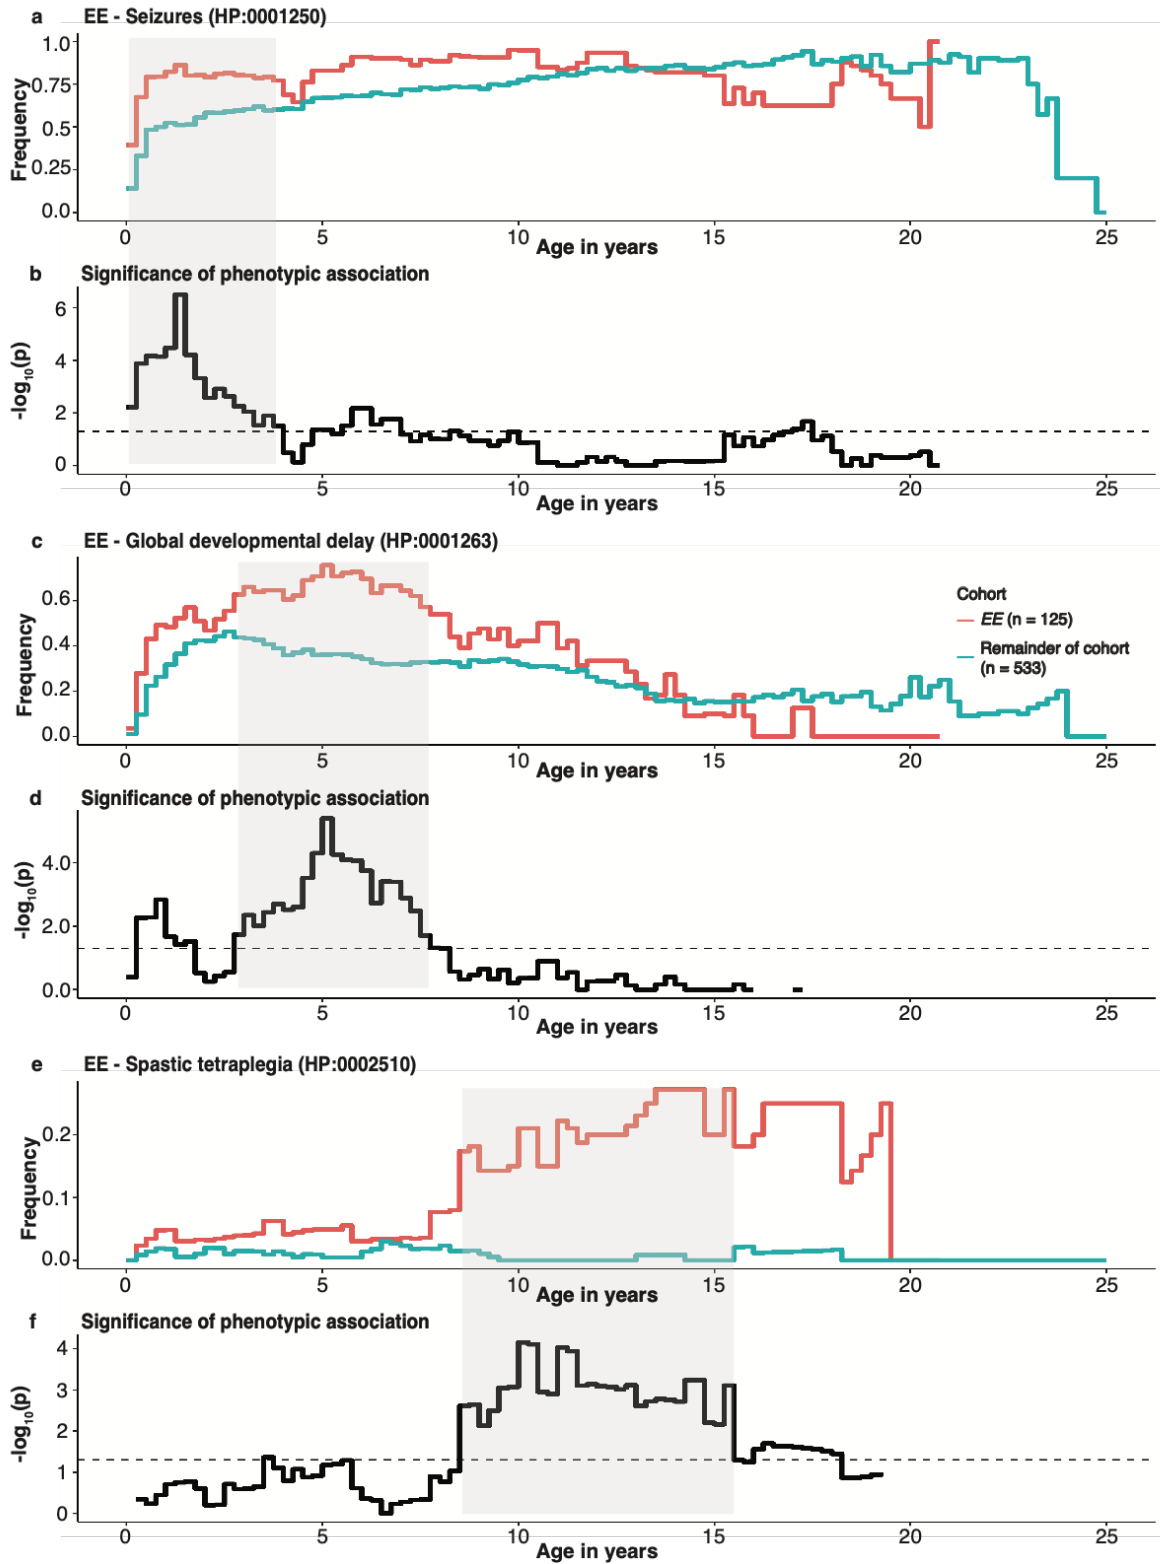

**Figure S6.** Associations between OMIM EIEE genes and specific phenotypic terms differ over time, including “Seizures” (HP:0001250), “Global developmental delay” (HP:0001263), and “Spastic tetraplegia” (HP:0002510). Grey bars indicate age ranges when phenotypic associations are significant.

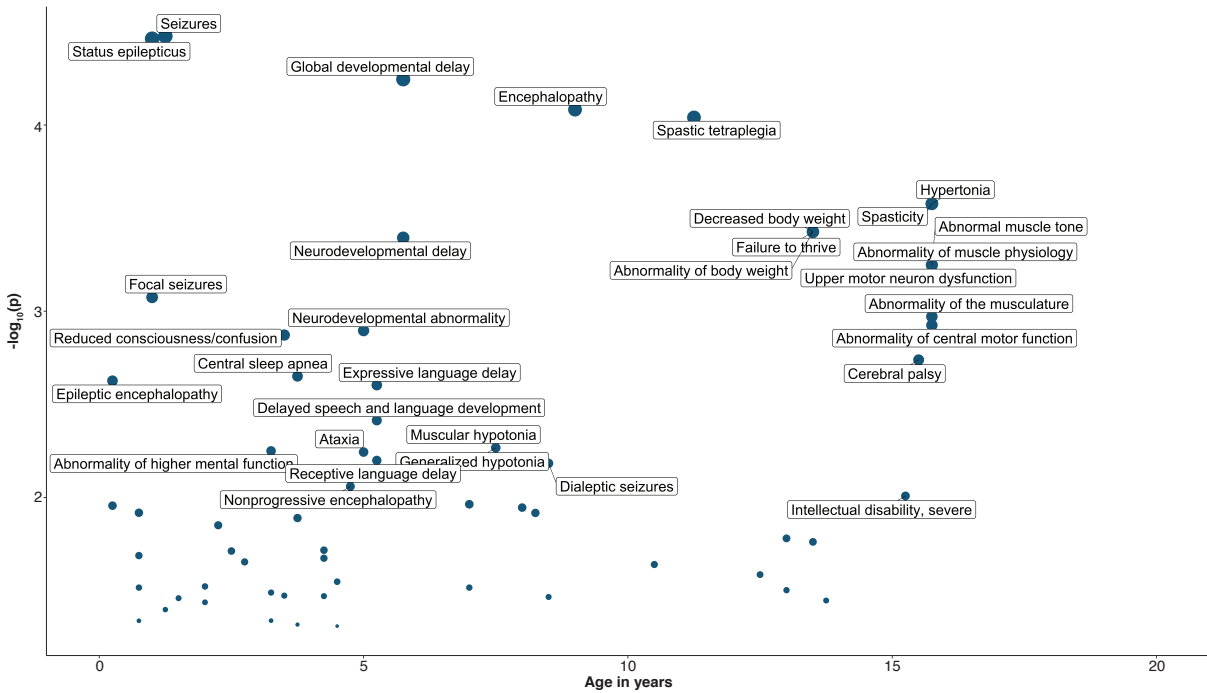

**Figure S7.** The HPO terms associated with 24 genes out of 96 genetic etiologies with a GO term of “ion channel activity” are shown with only the time interval with the most significant association for each HPO term displayed. X-axis denotes patient age, y-axis denotes  $-\log_{10}$  of the p-value (Fisher’s exact test). HPO term annotations for the most significant associations with  $-\log_{10}(p)$ -value greater than 2 are shown.

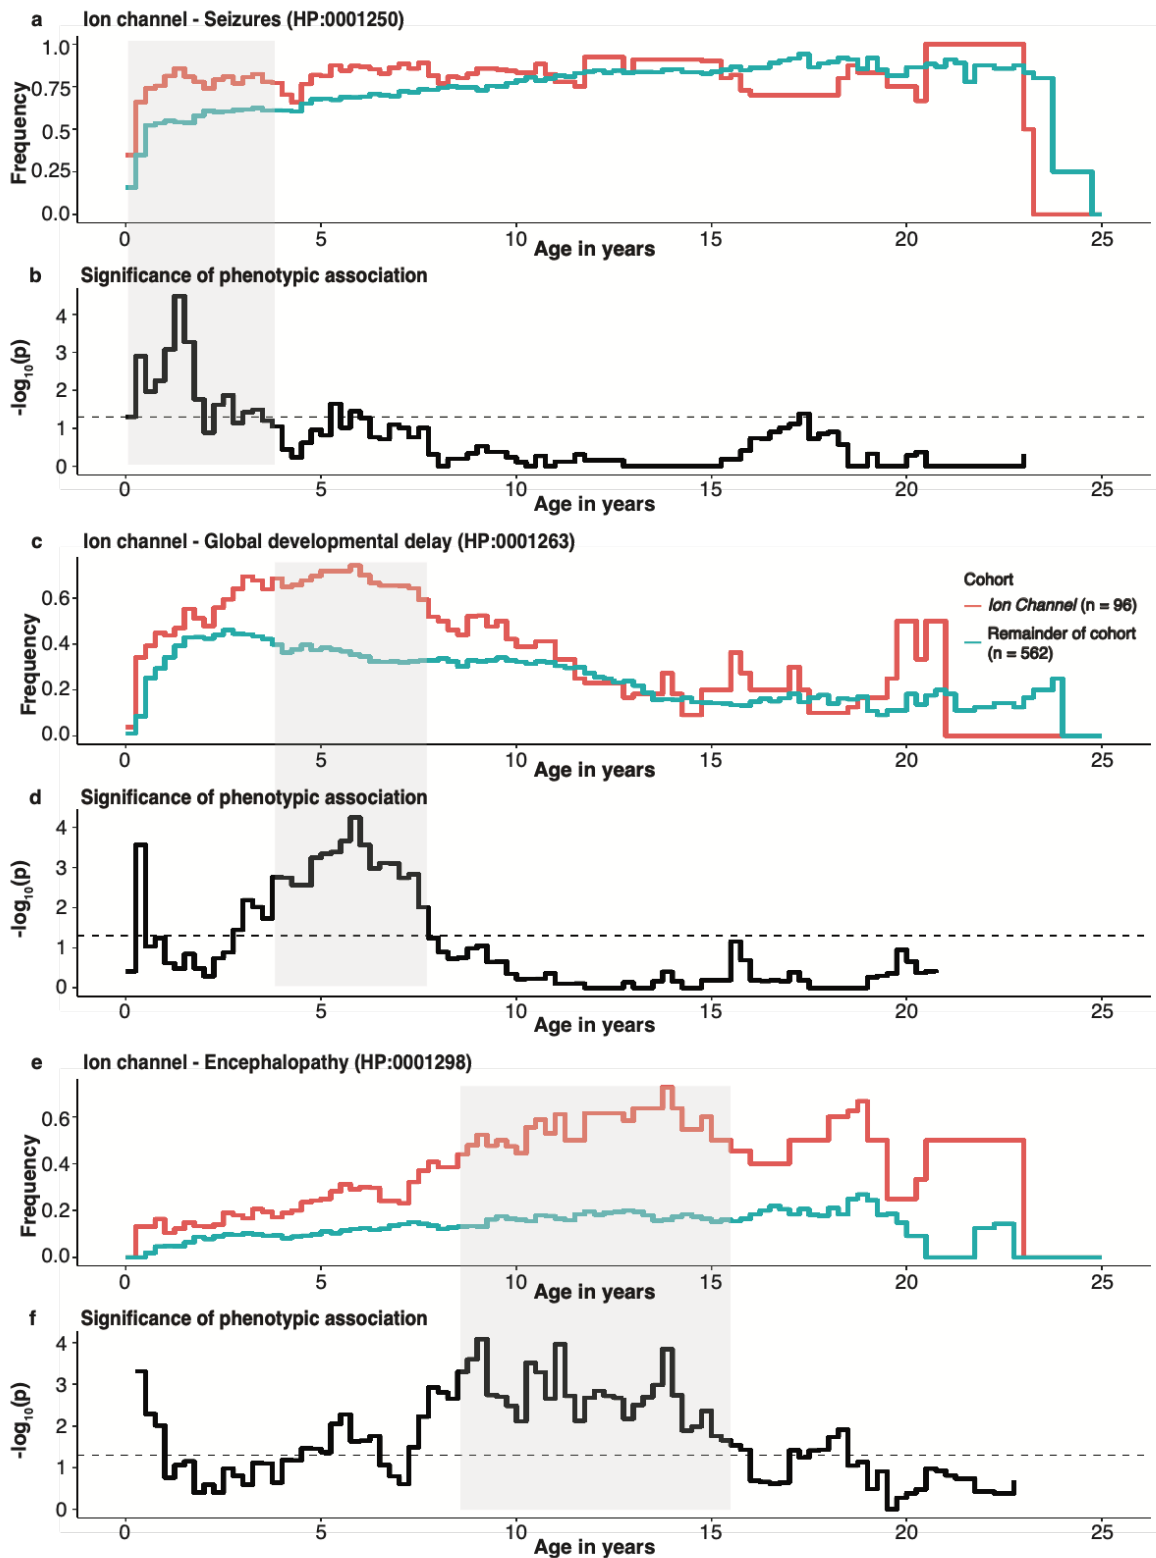

**Figure S8.** Associations between genetic etiologies with a GO term of “ion channel activity” (GO:0005216) and specific phenotypic terms differ over time, including “Seizures” (HP:0001250), “Global developmental delay” (HP:0001263), and “Spastic tetraplegia” (HP:0002510). Grey bars indicate age ranges when phenotypic associations are significant.

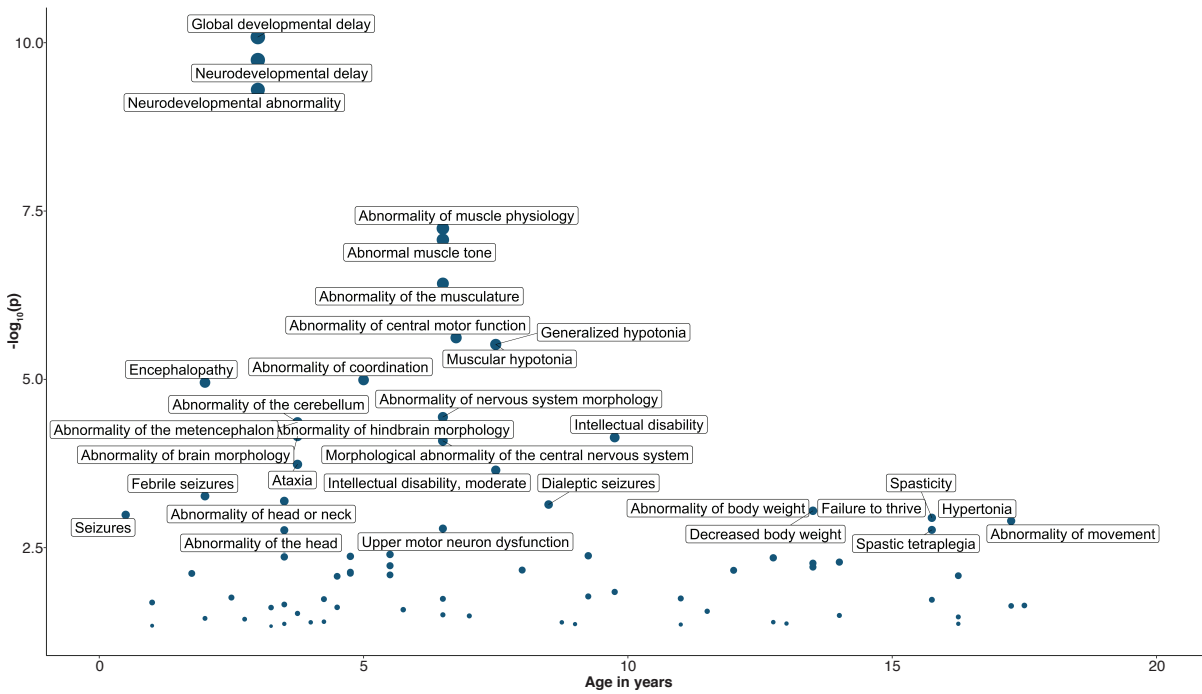

**Figure S9.** The HPO terms associated with all genetic etiologies in our cohort (102 distinct genetic etiologies in a total of 232 individuals) are shown with only the time interval with the most significant association for each HPO term displayed. X-axis denotes patient age, y-axis denotes  $-\log_{10}$  of the p-value (Fisher's exact test). HPO term annotations for the most significant associations with  $-\log_{10}(p)$ -value greater than 2.5 are shown.

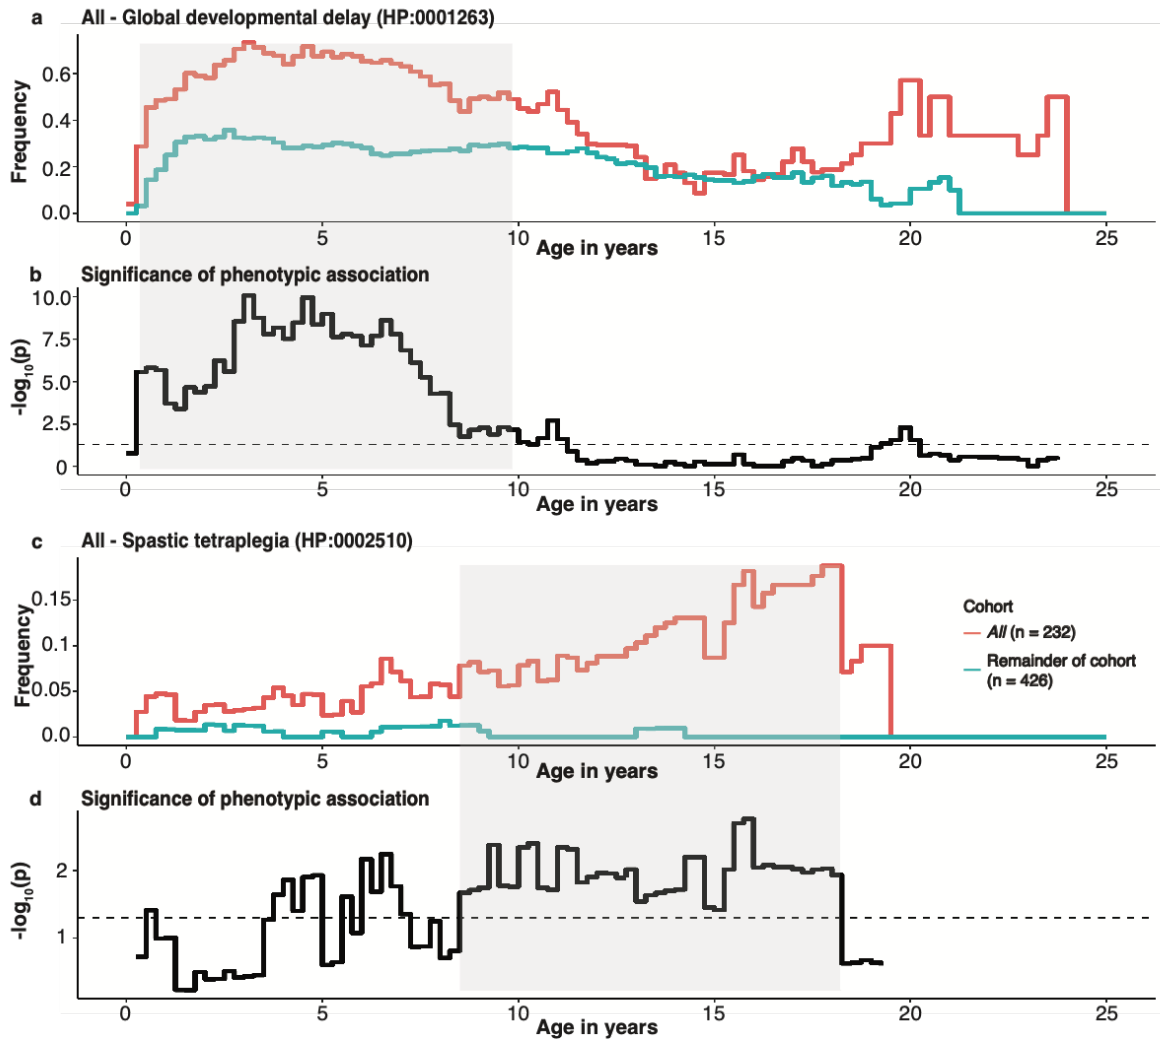

**Figure S10.** Associations between all genetic etiologies (232 individuals, 102 genetic etiologies) and “Global developmental delay” (HP:0001263) and “Spastic tetraplegia (HP:0002510). Grey bar indicates age range when the phenotypic association is significant.



Additional supplementary figures as cited in main manuscript

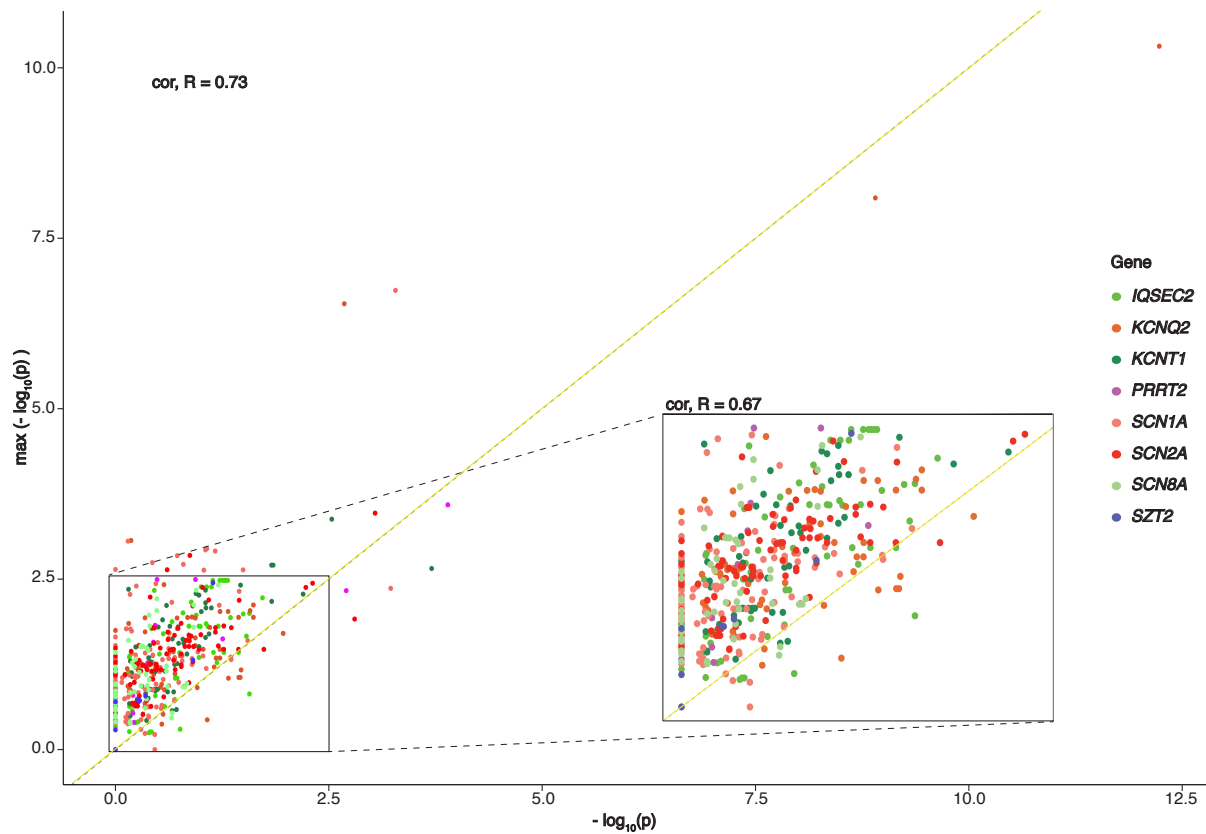

**Figure S11.** The correlation between time-dependent and collapsed genotype-phenotype information is moderate. X-axis demonstrates the p-value for a phenotypic features per gene when data for all 100 time periods is collapsed. Y-axis demonstrates the most significant association between each gene and each phenotypic feature, selecting the time point with the highest significance. P-values are shown as  $-\log_{10}$ , color represents genes. Time-dependent associations are generally more significant than collapsed data, and there is an overall moderate correlation.

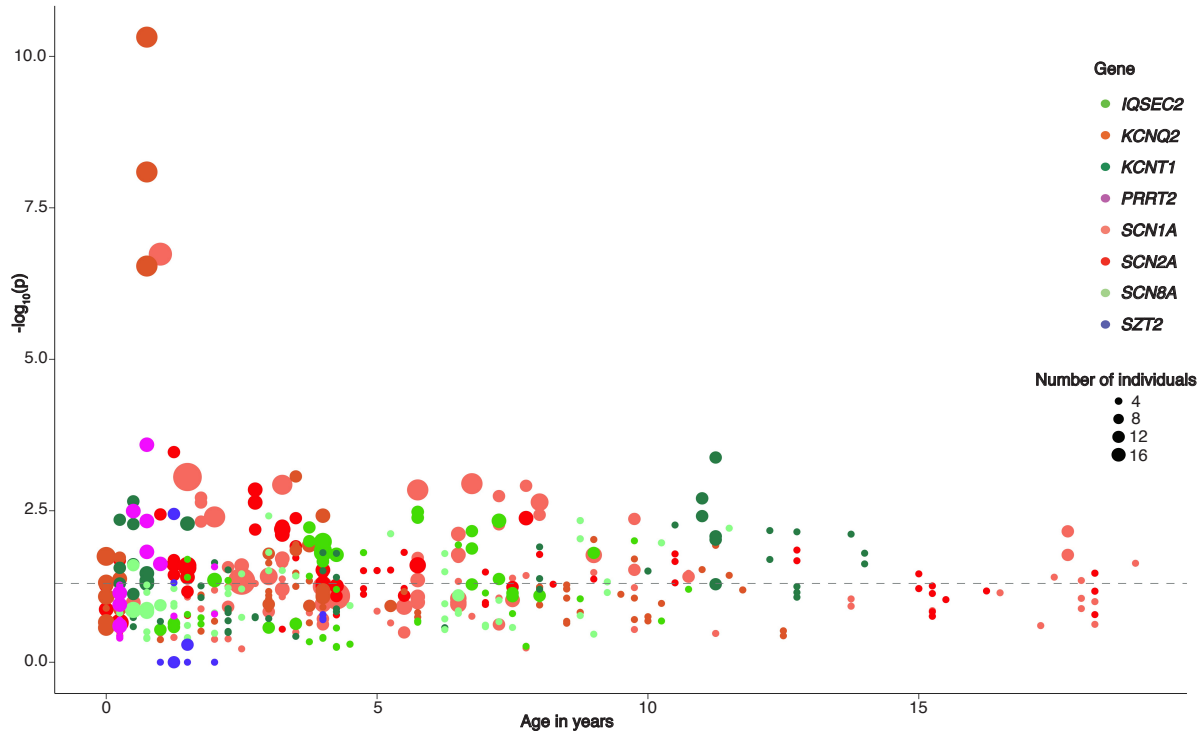

**Figure S12.** Patterns of significant gene-phenotype associations differ over time and are dependent on the number of individuals with a distinct gene. X-axis indicates age and y-axis indicates  $-\log_{10}$  for gene-phenotype associations. Size of the bubble indicates number of individuals with a specific gene and color indicates gene. While significant associations require a larger number of individuals, non-significant associations are also observed with an equal number of individuals. Over time, both the significance as well as the number of individuals per gene decrease. We did not find a general bias towards more significant associations in time intervals with a higher number of individuals across all 528 terms.

## Supplementary References

1. Resnik P, editor. Using information content to evaluate semantic similarity in a taxonomy. 14th International Joint Conference on Artificial Intelligence; 1995; Montreal: Morgan Kaufmann Publishers Inc. San Francisco, CA, USA.
2. Mignot C, McMahon AC, Bar C, et al. IQSEC2-related encephalopathy in males and females: a comparative study including 37 novel patients. *Genet Med.* 2019 Apr;21(4):837-49.
3. Radley JA, O'Sullivan RBG, Turton SE, et al. Deep phenotyping of 14 new patients with IQSEC2 variants, including monozygotic twins of discordant phenotype. *Clin Genet.* 2019 Apr;95(4):496-506.
4. Claes L, Del-Favero J, Ceulemans B, Lagae L, Van Broeckhoven C, De Jonghe P. De novo mutations in the sodium-channel gene SCN1A cause severe myoclonic epilepsy of infancy. *Am J Hum Genet.* 2001 Jun;68(6):1327-32.
5. Miller IO, Sotero de Menezes MA. SCN1A Seizure Disorders. In: Adam MP, Ardinger HH, Pagon RA, Wallace SE, Bean LJH, Stephens K, et al., editors. *GeneReviews*((R)). Seattle (WA)1993.

## Additional supplementary figures

Phenotypic features associated with discrete genetic etiologies at specific time points when binned into 3-month intervals. Clinical terms associated with individual genes occur at different time intervals. The HPO terms associated with all the 36 genes identified in two or more individuals in our cohort are shown as an example with only the time interval with the most significant association for each HPO term shown. X-axis denotes patient age, y-axis denotes  $-\log_{10}$  of the p-value (Fisher's exact test).

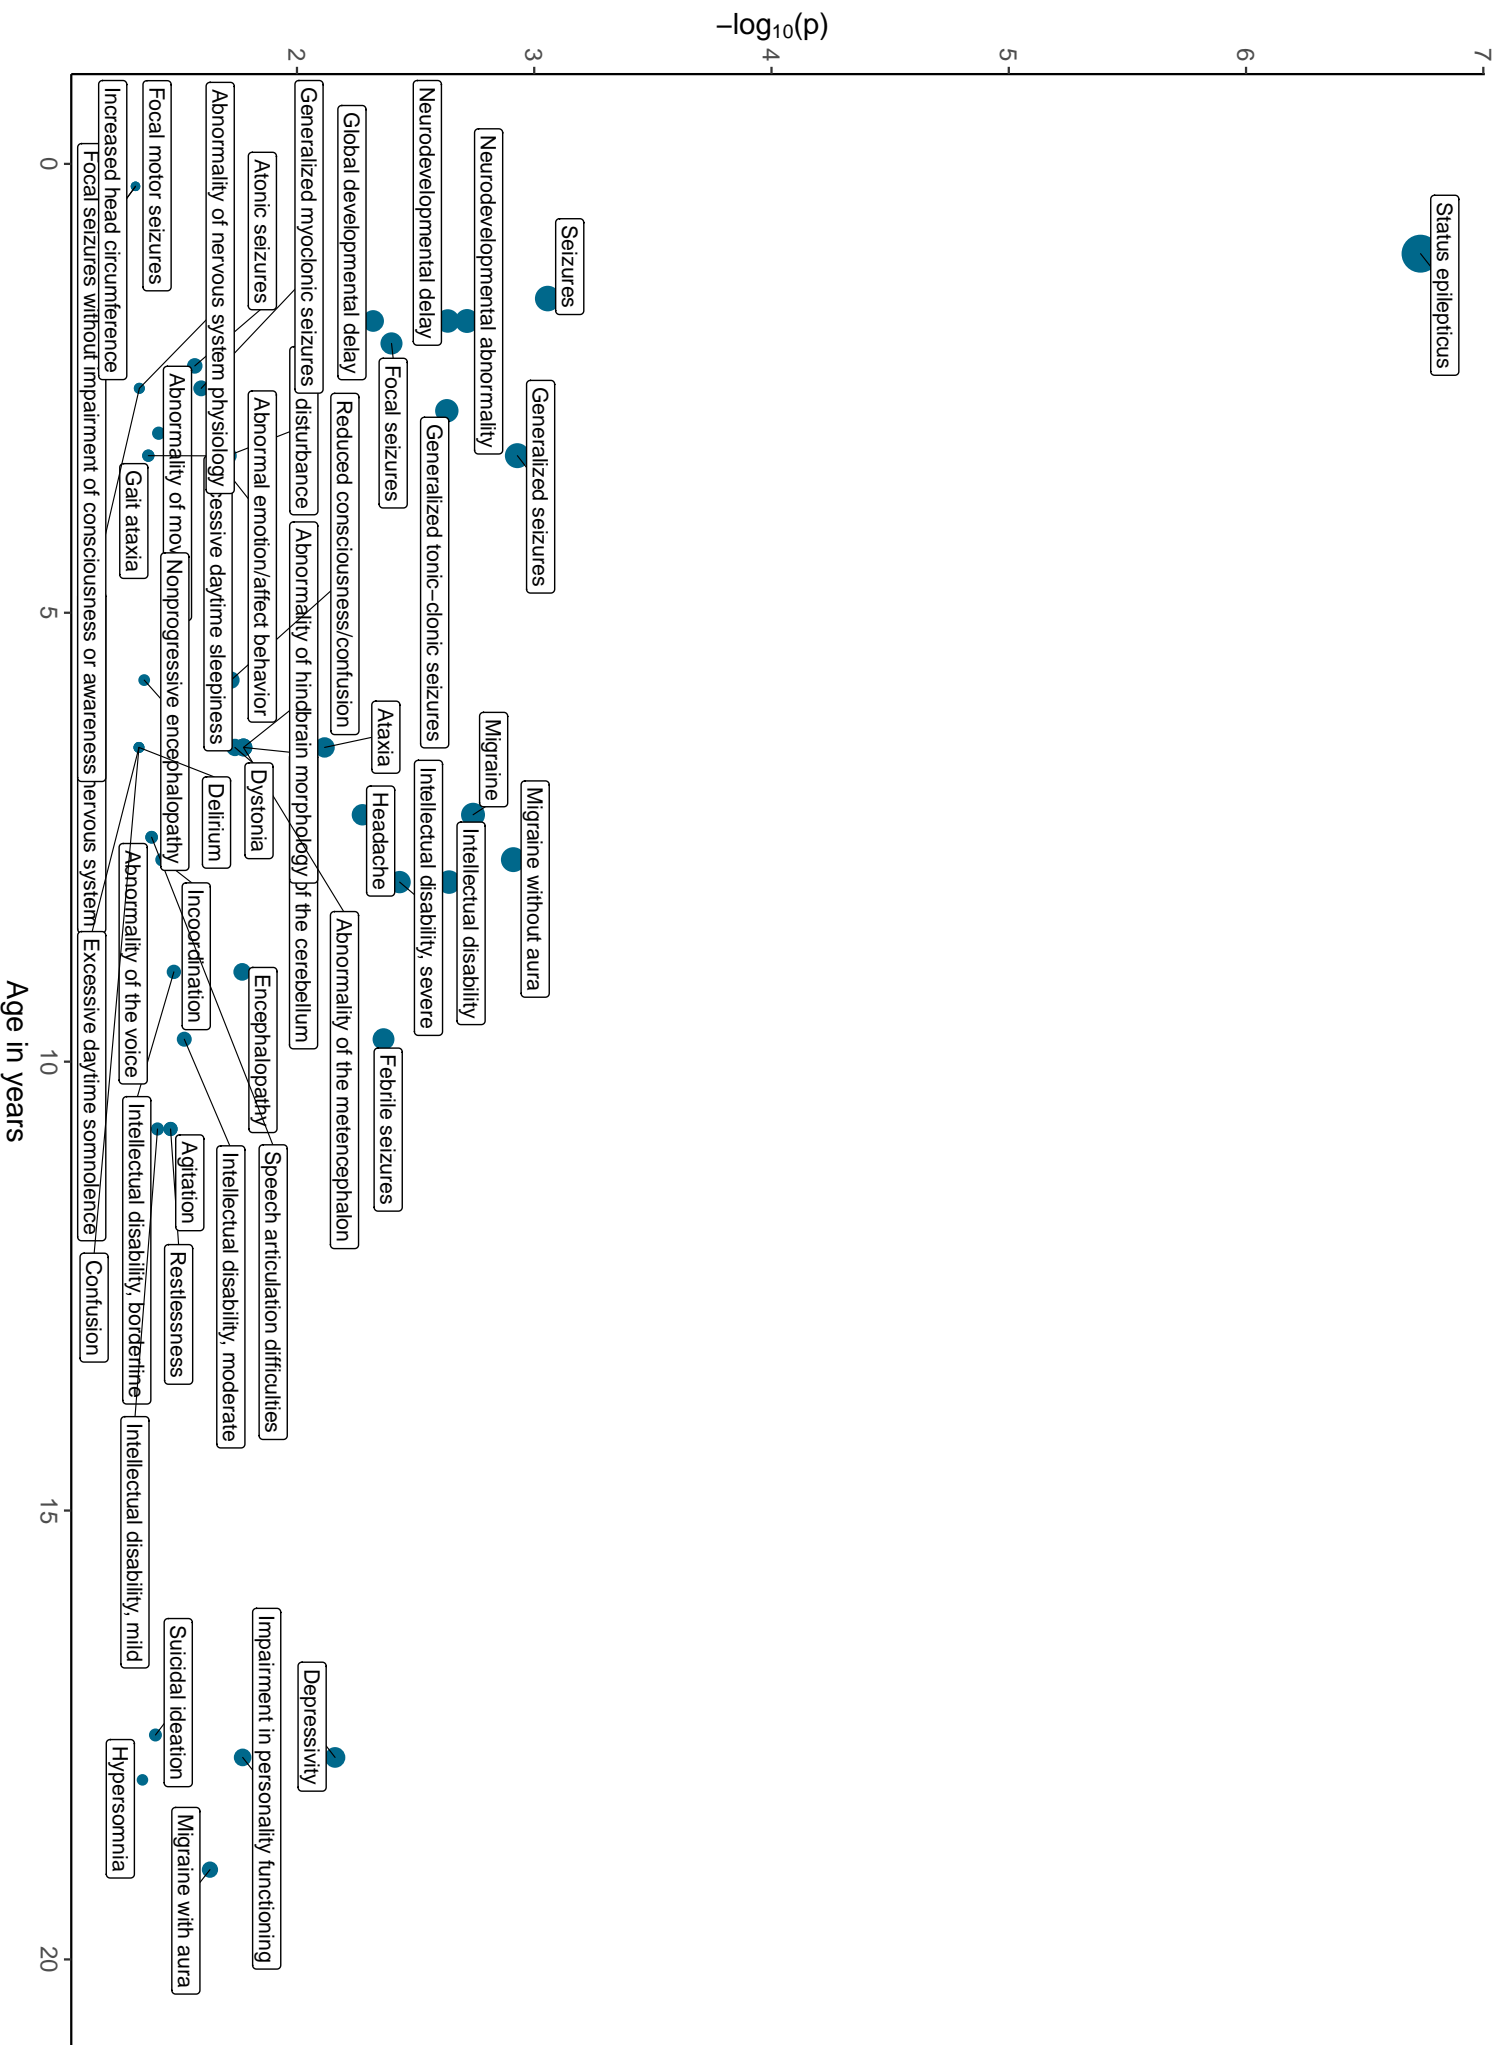

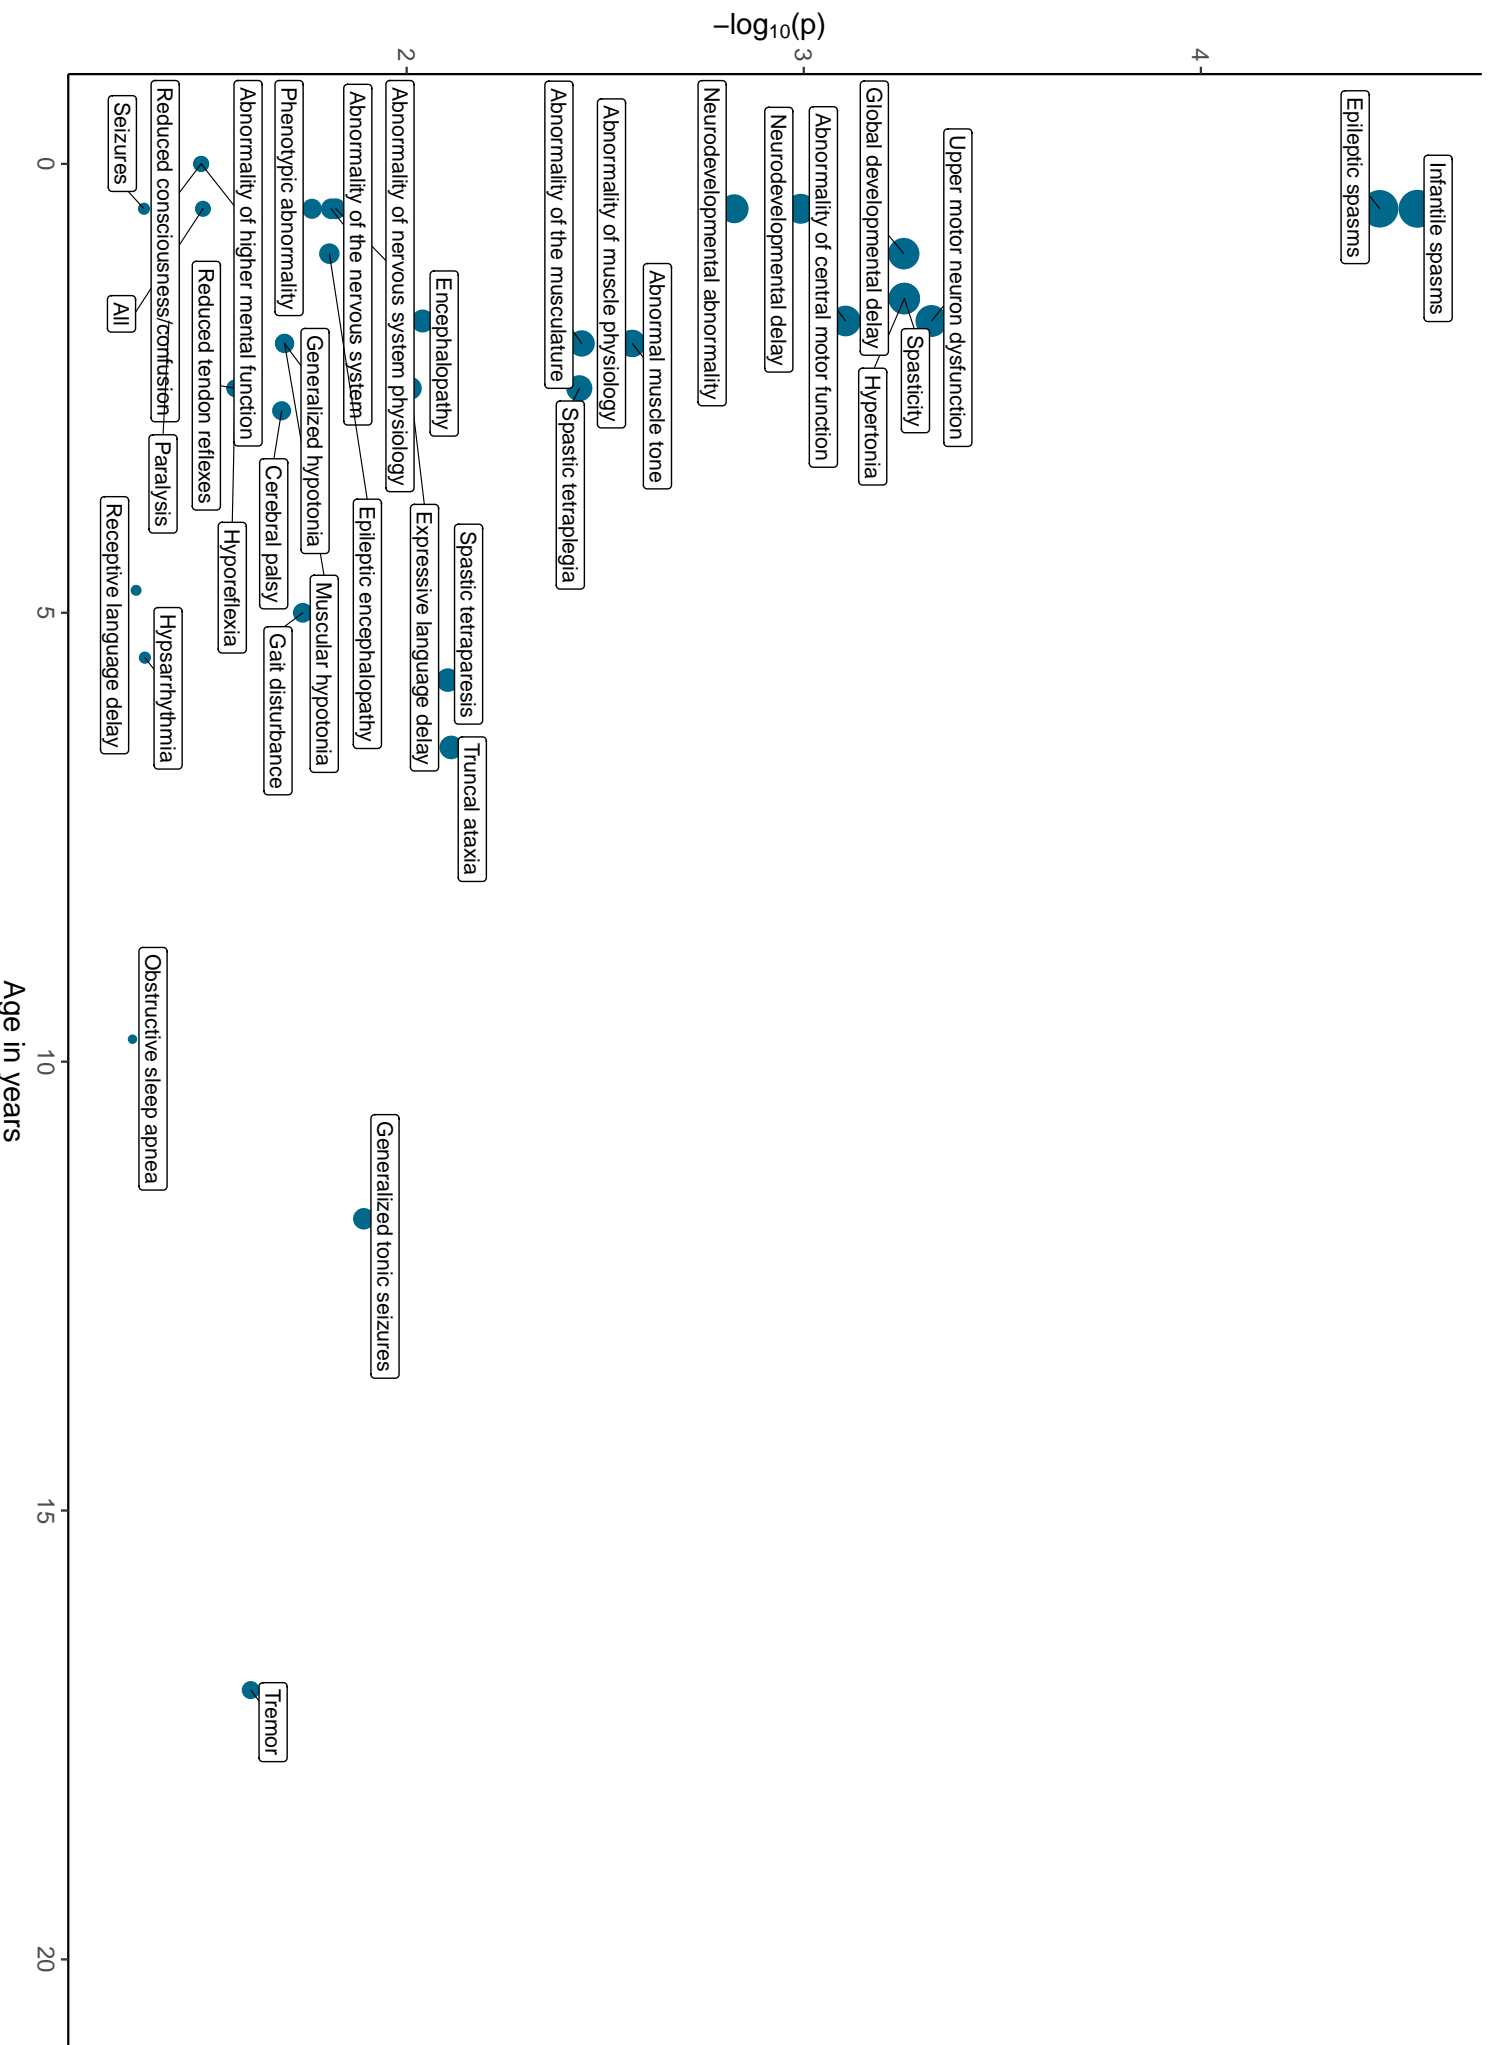

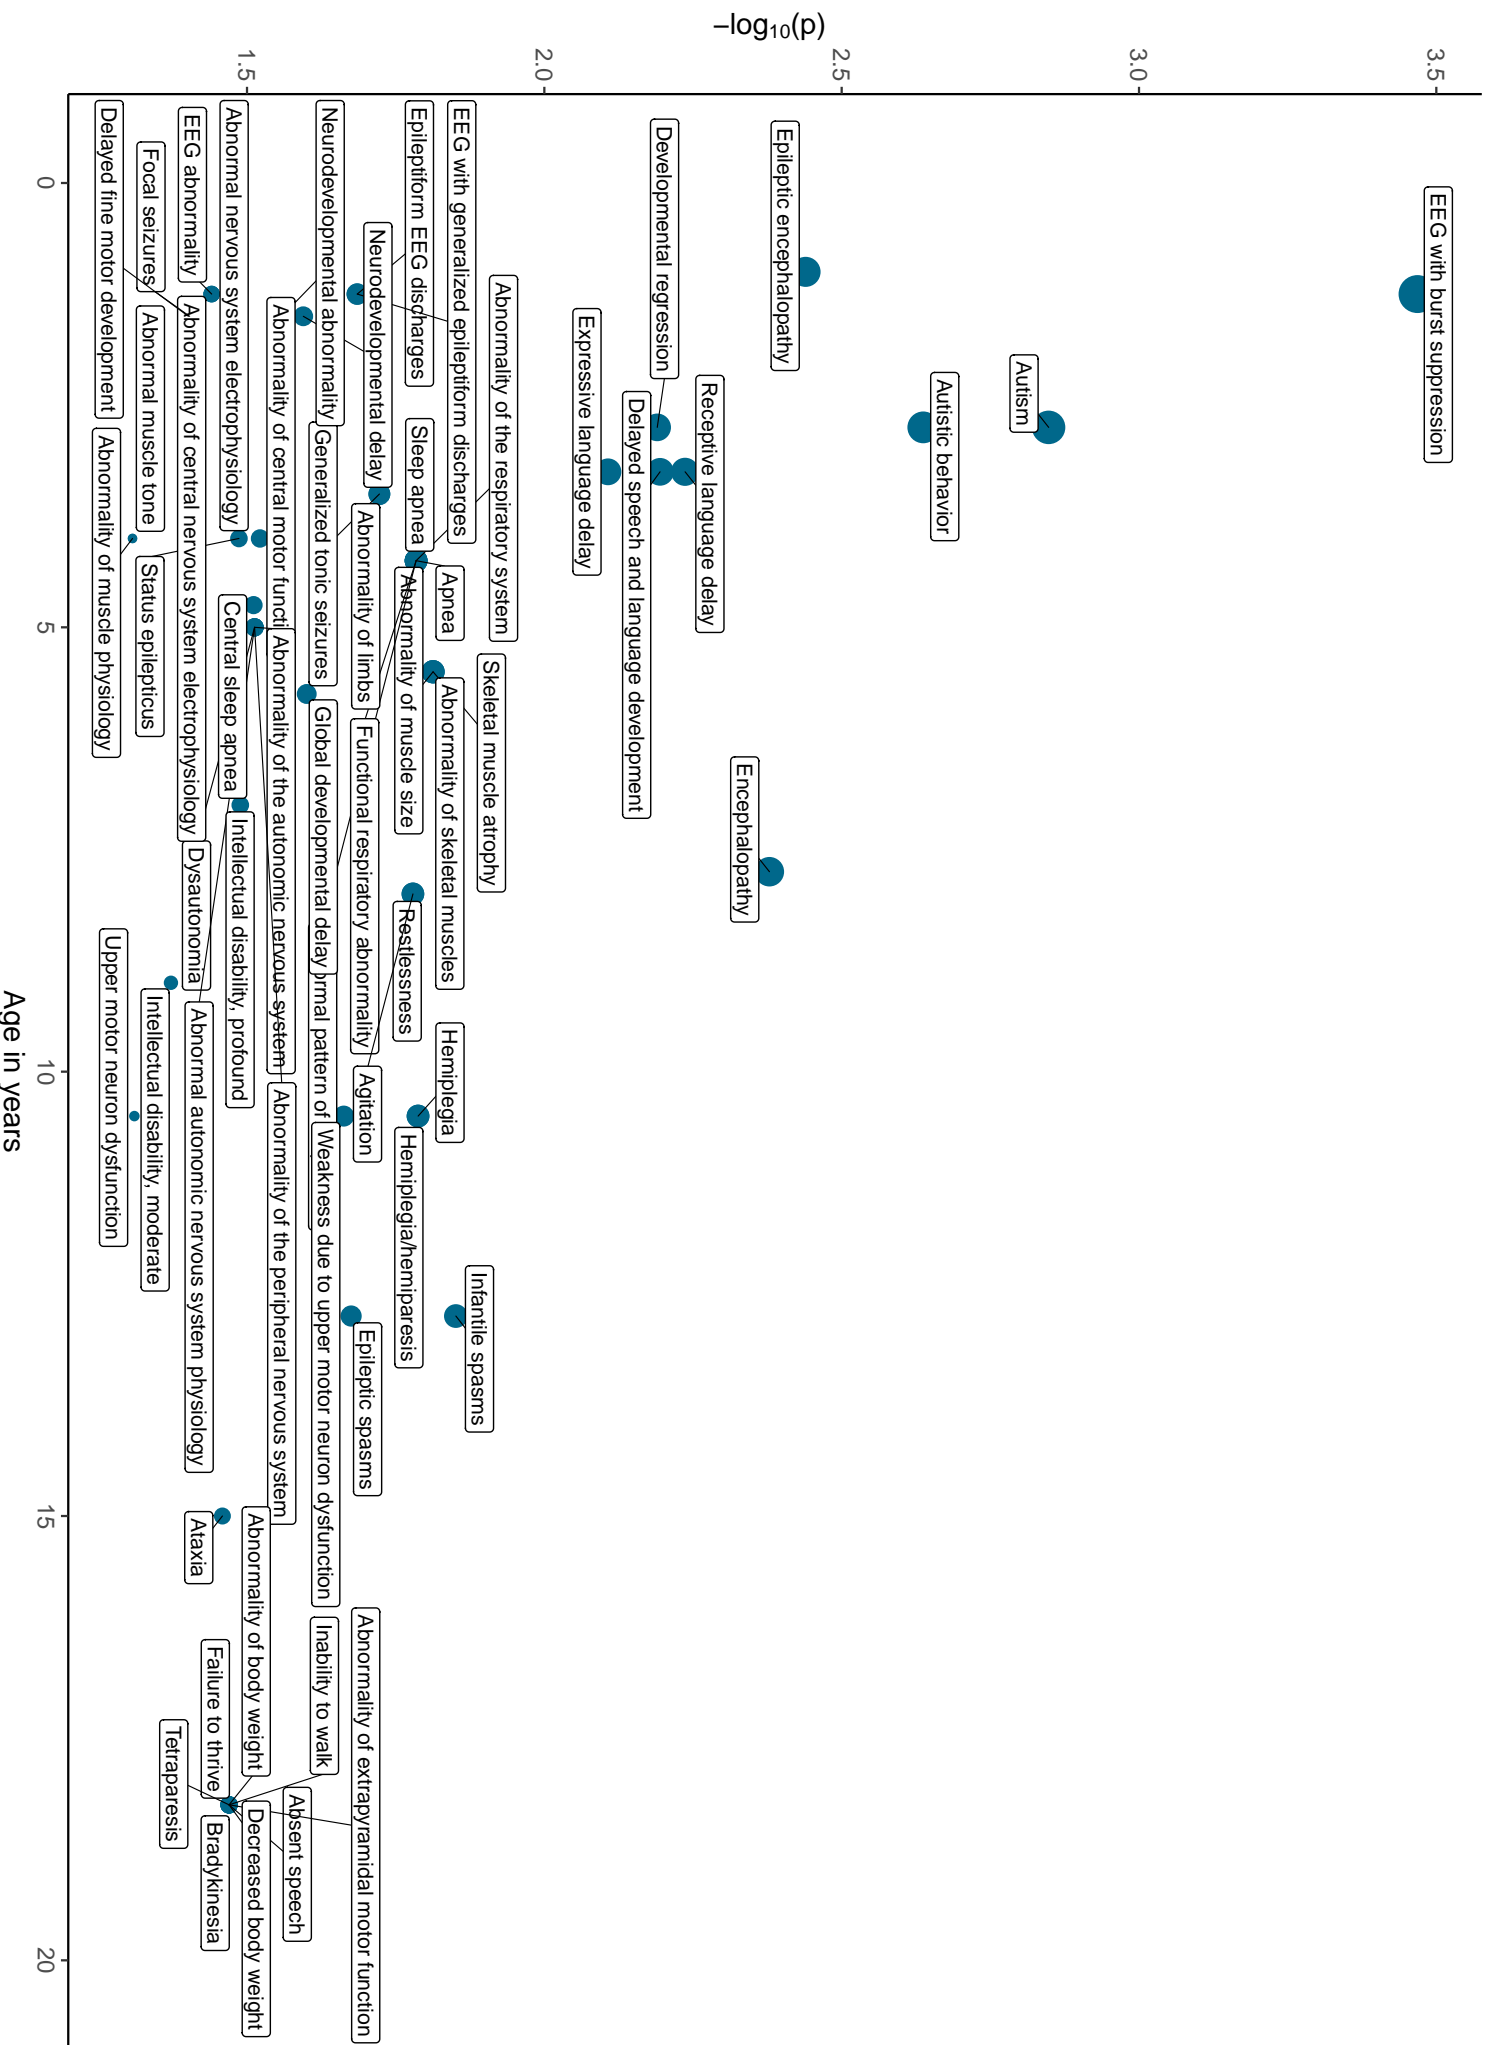

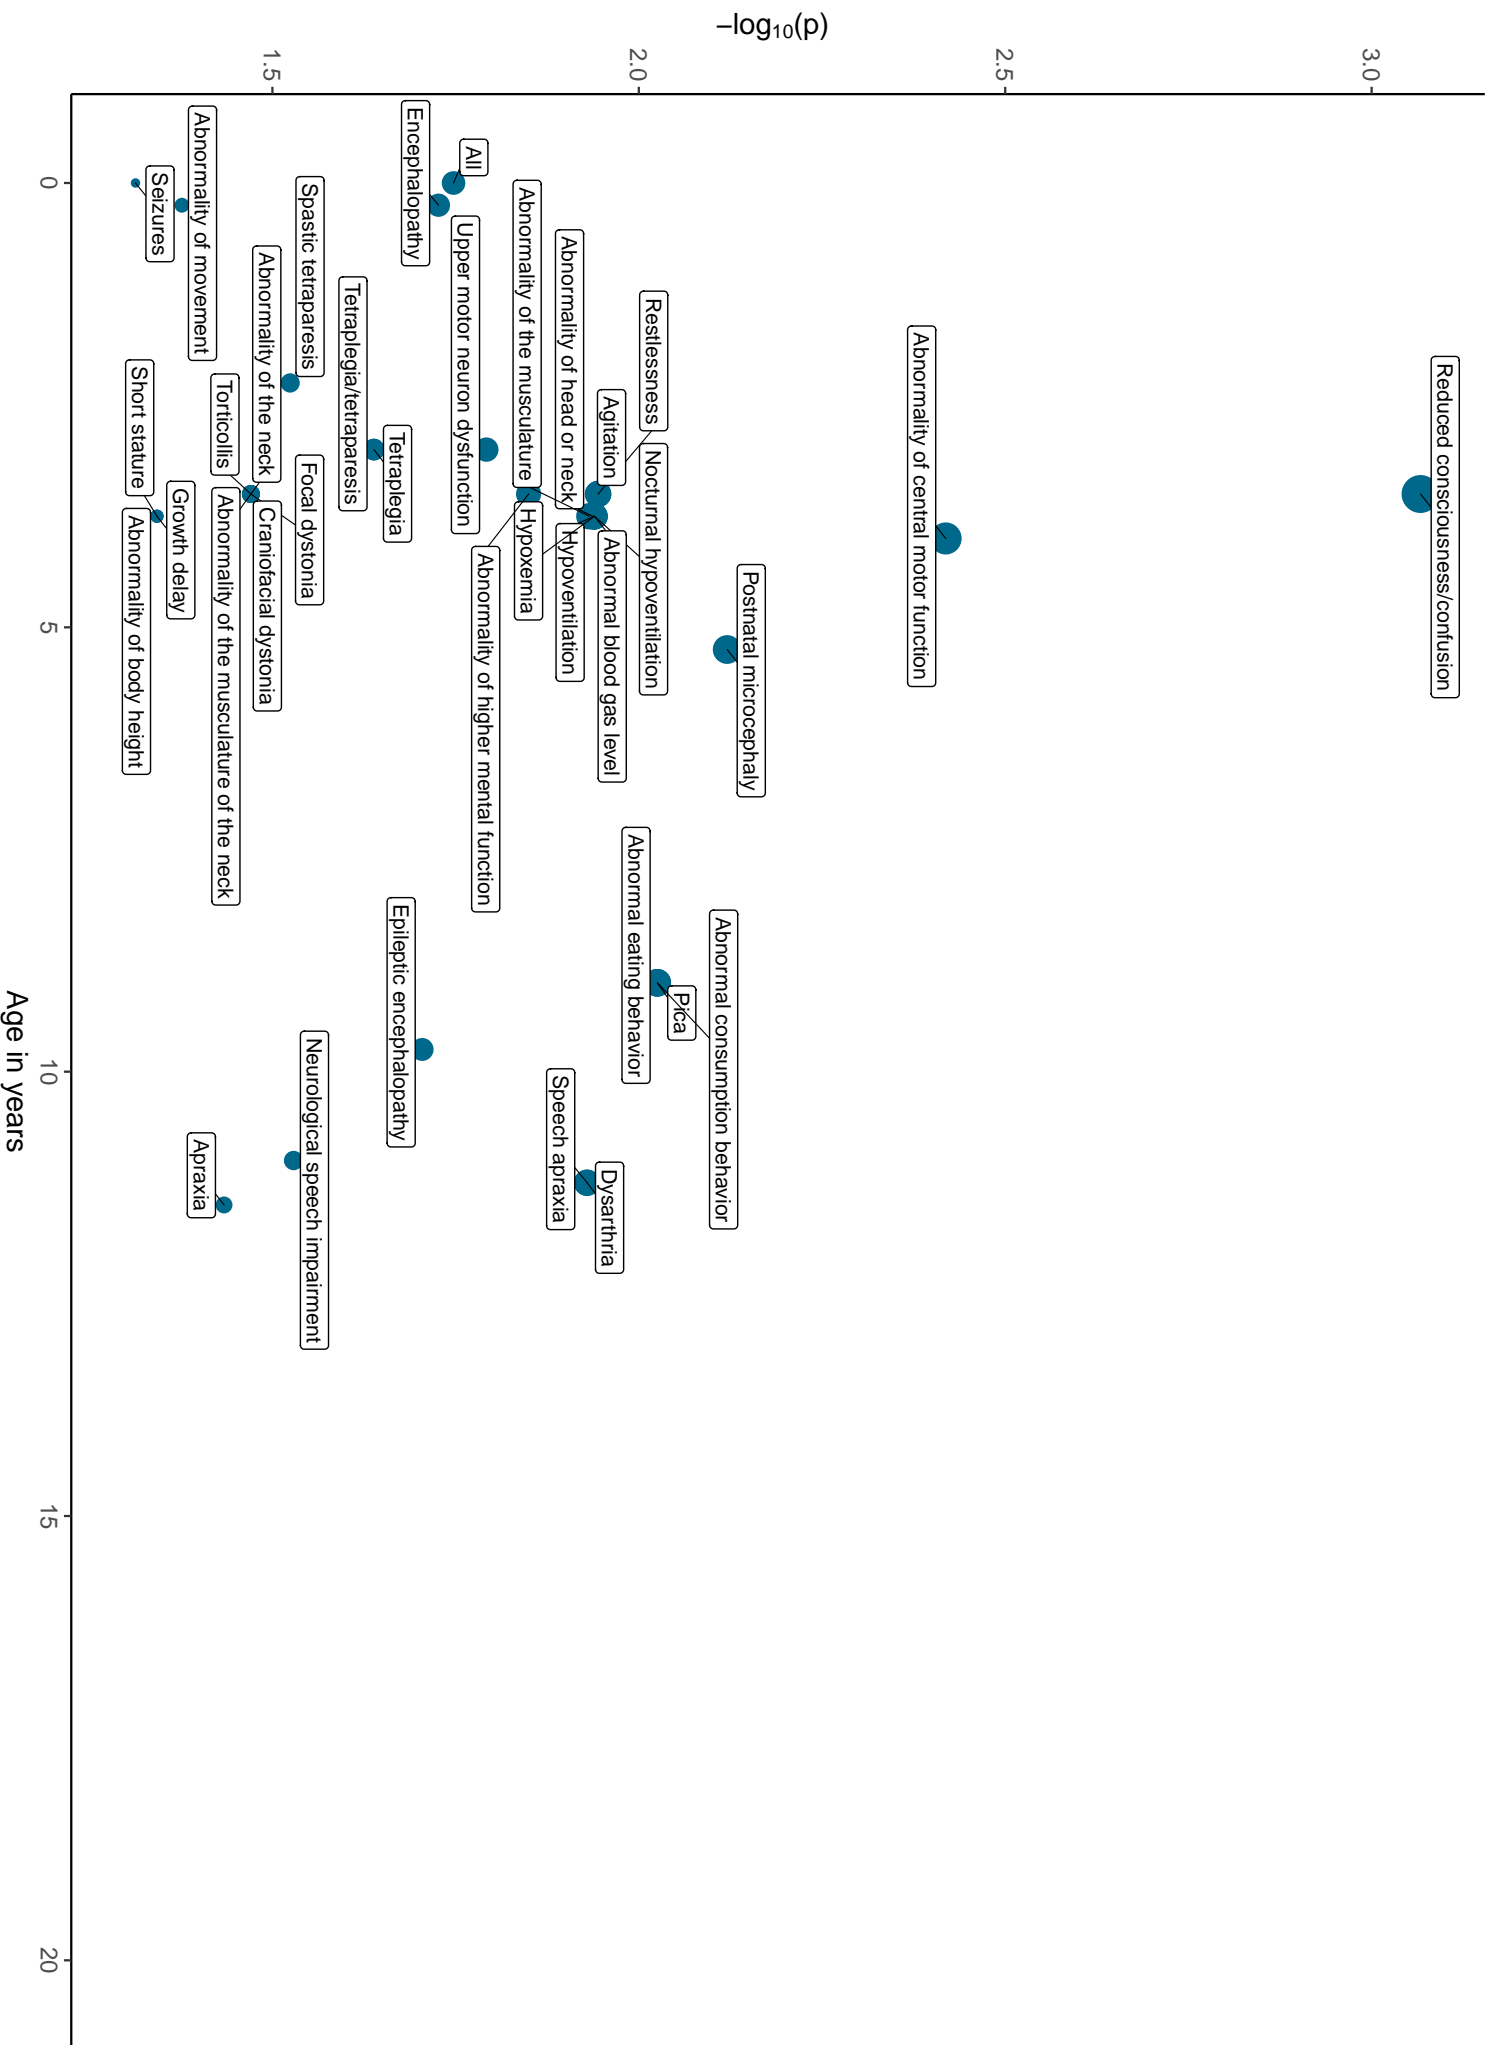



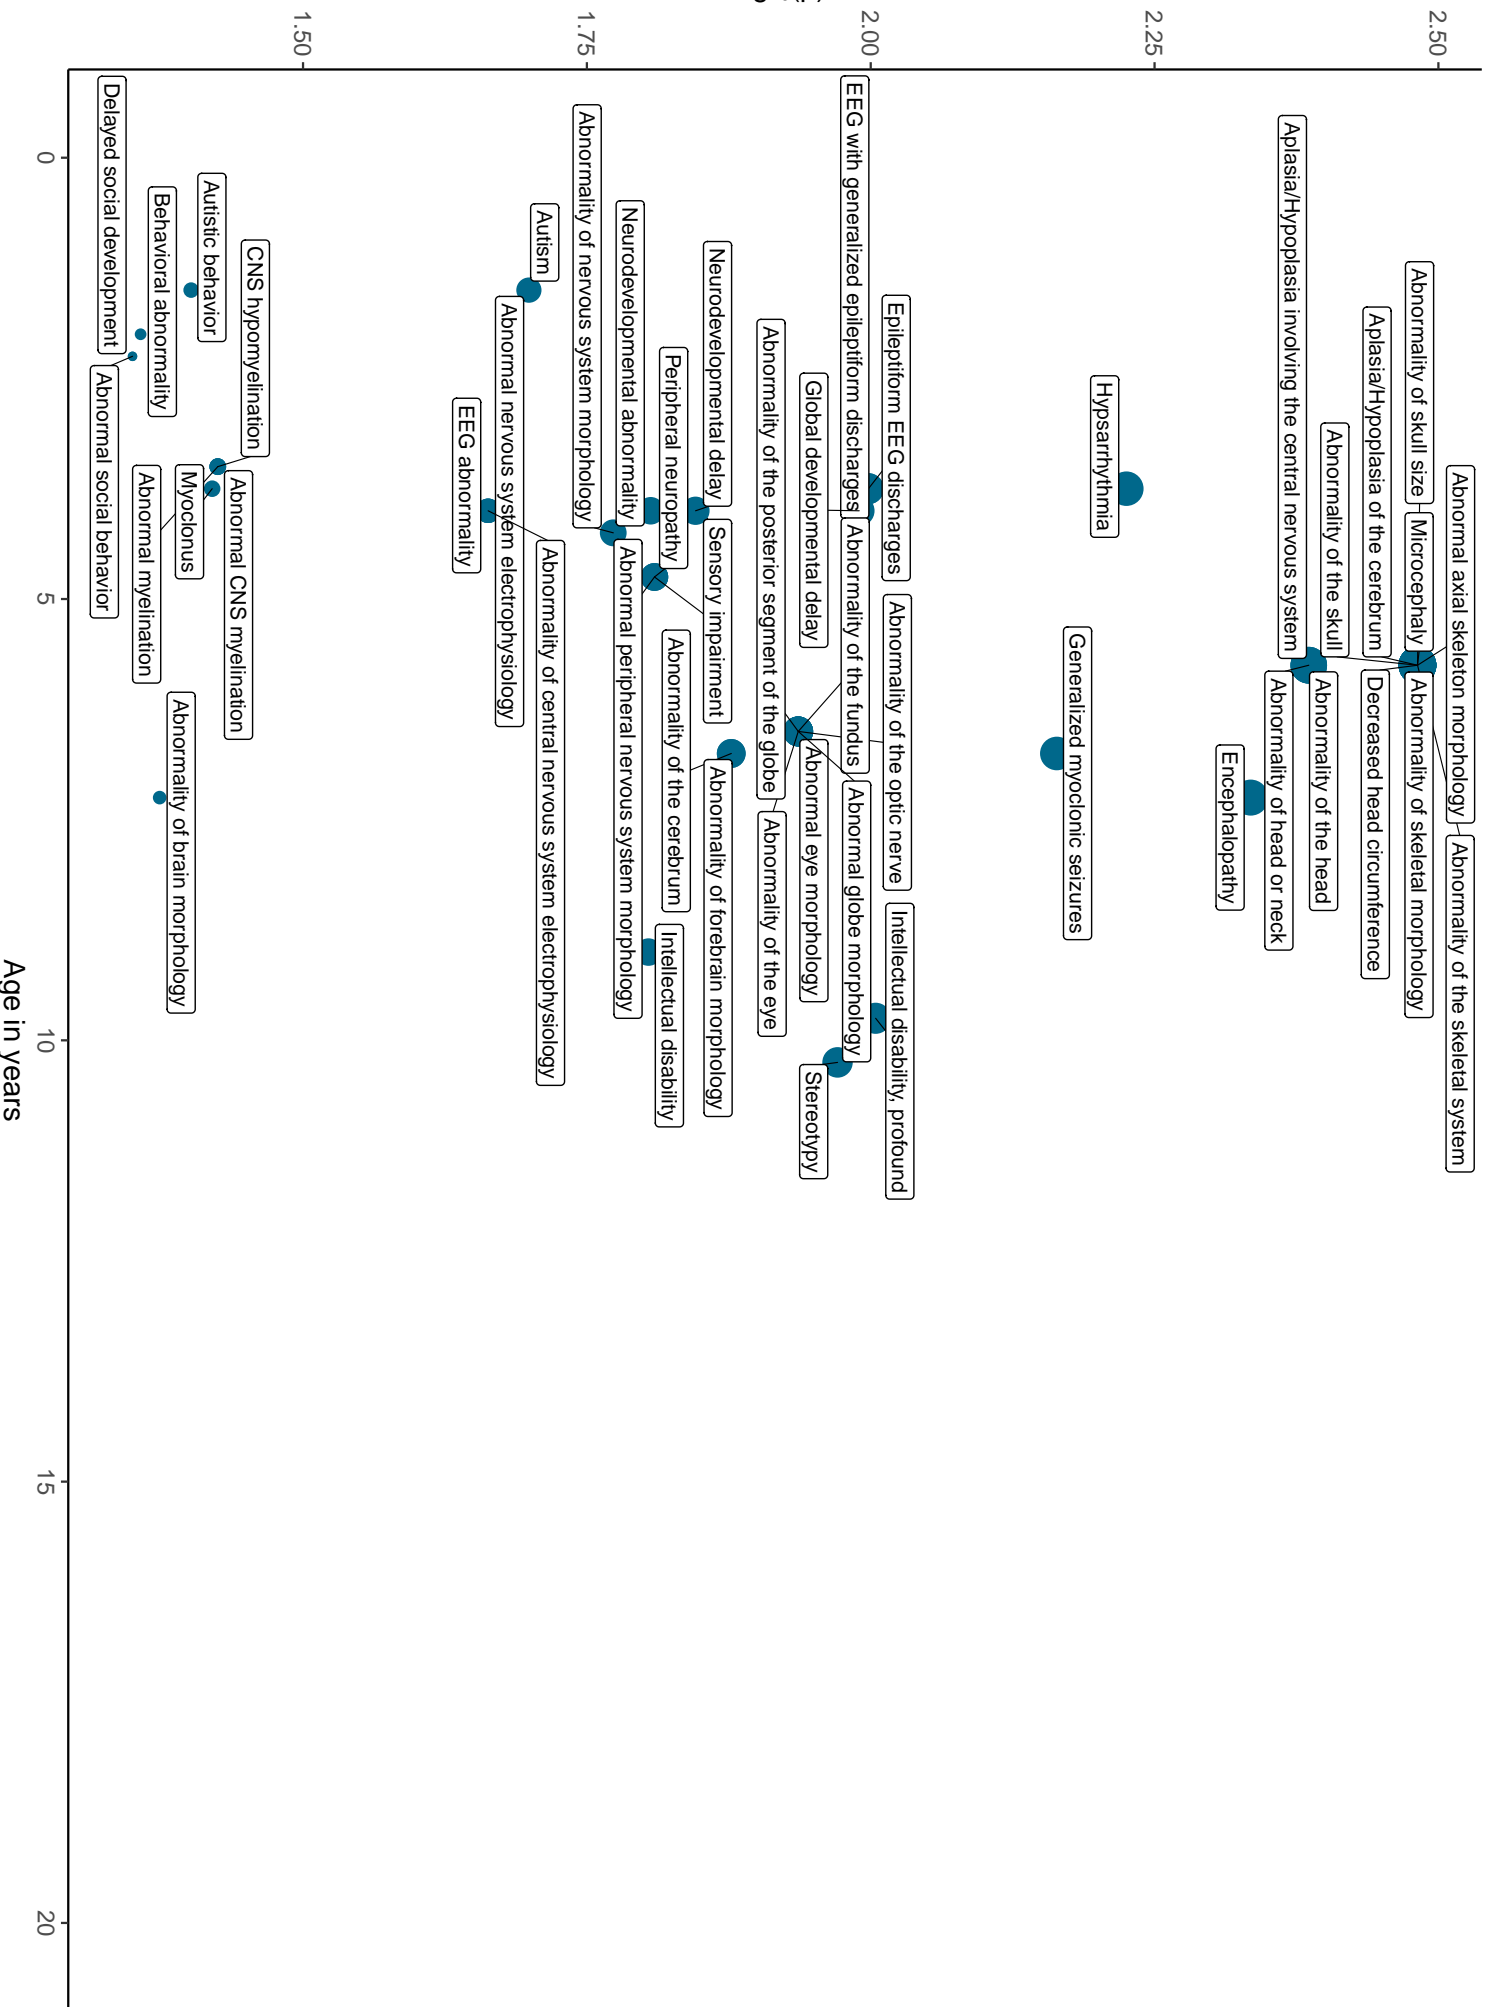

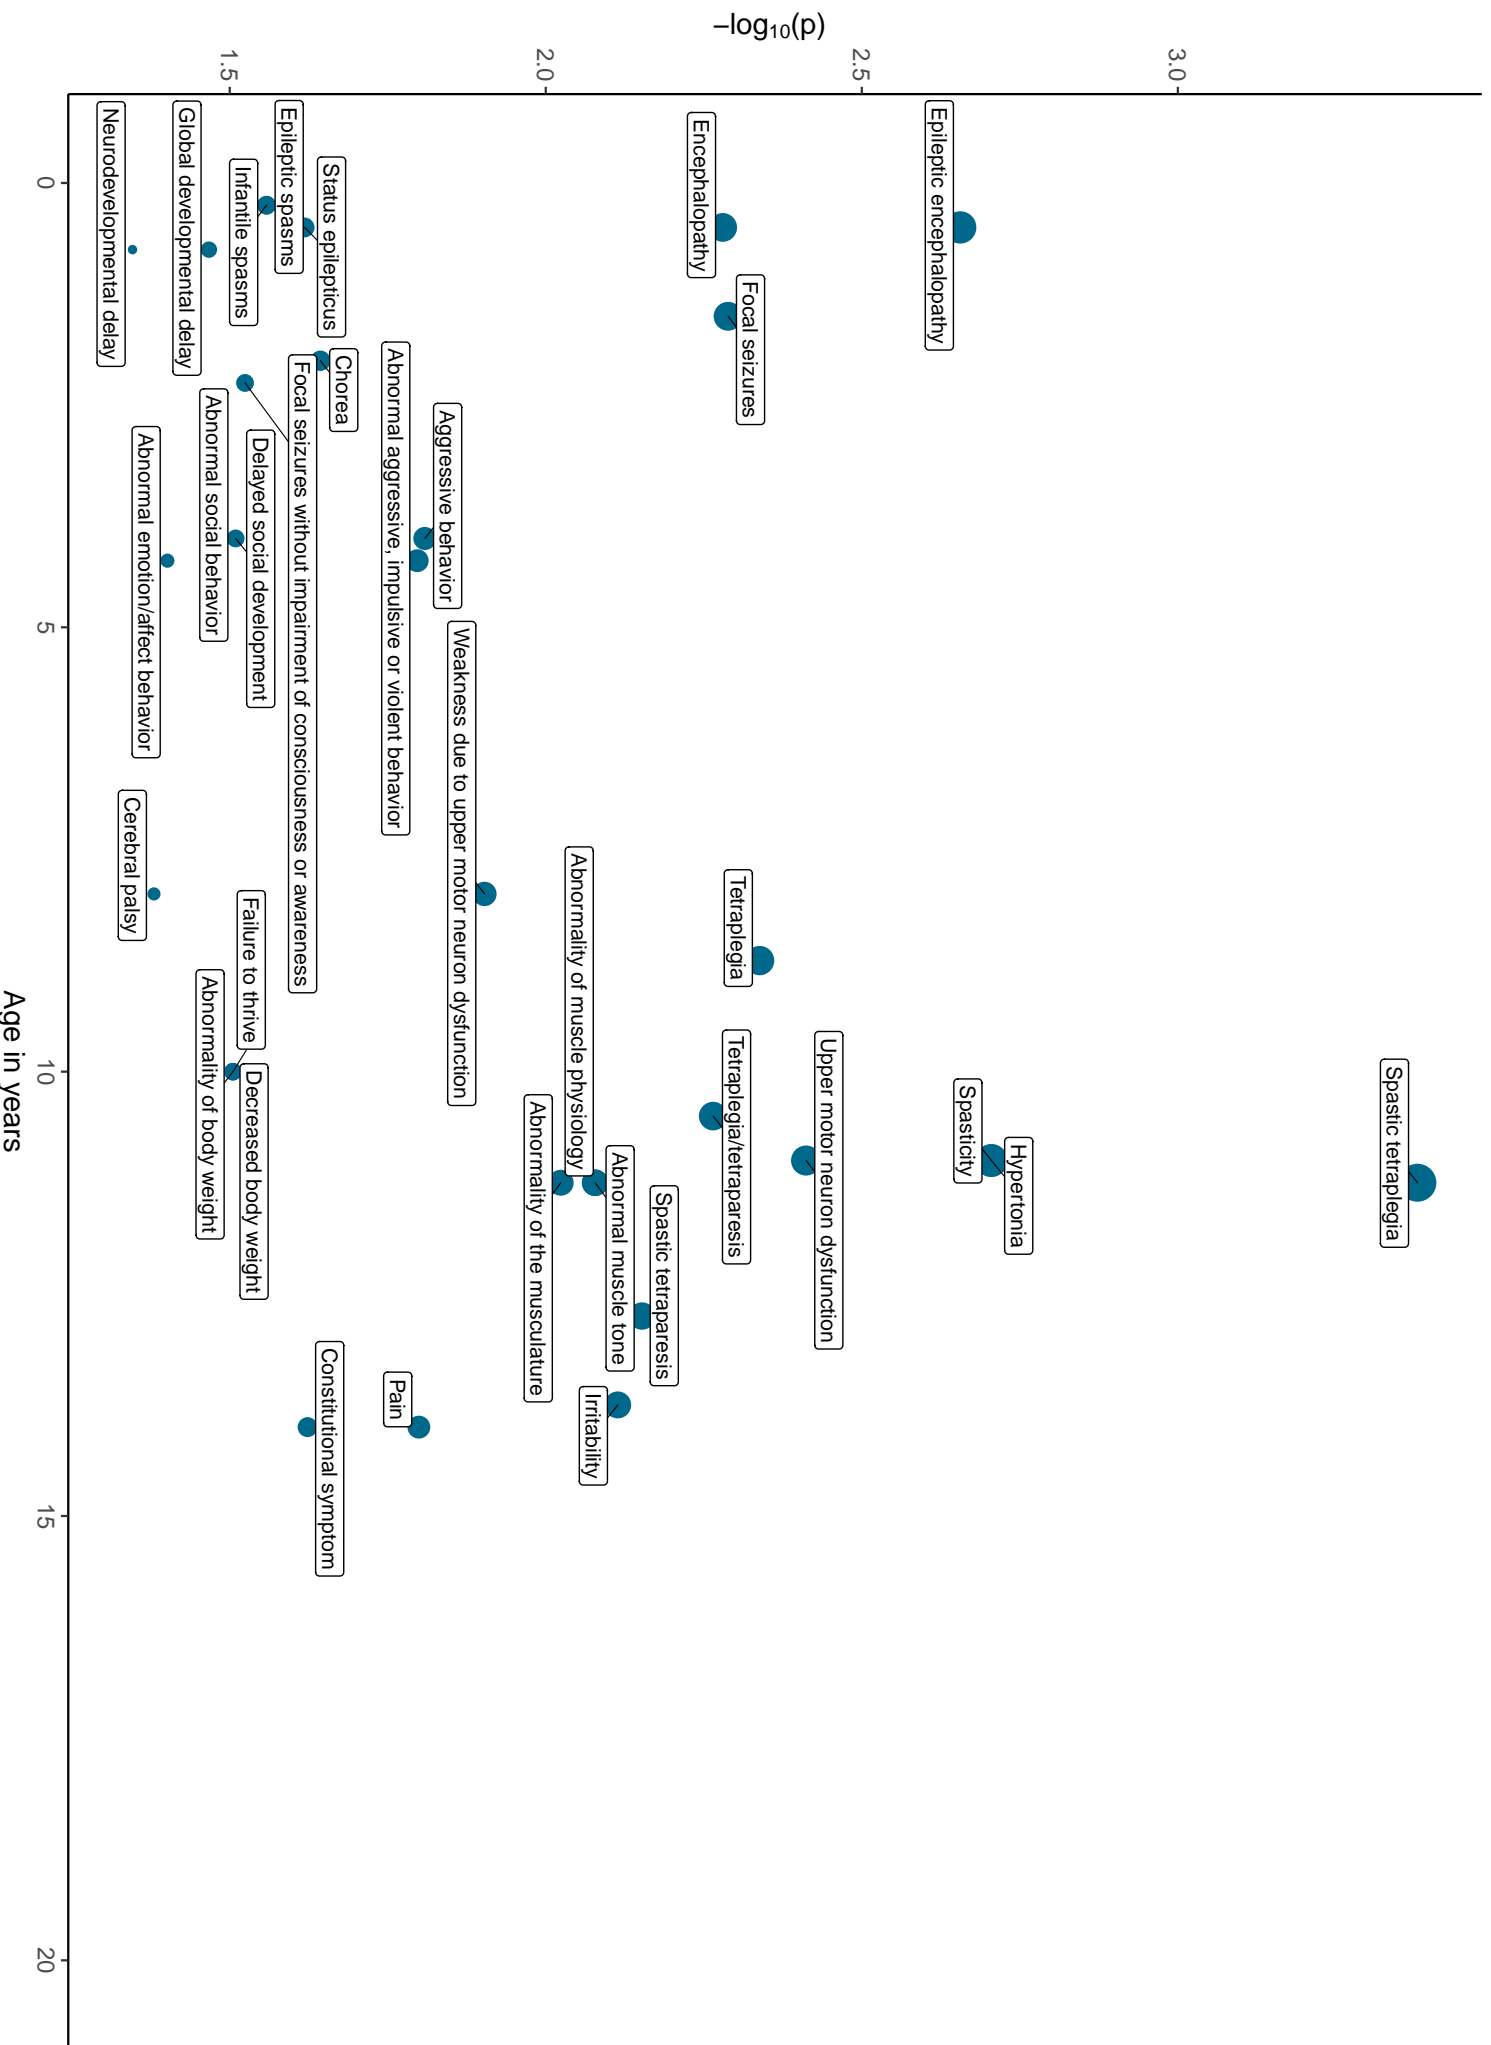

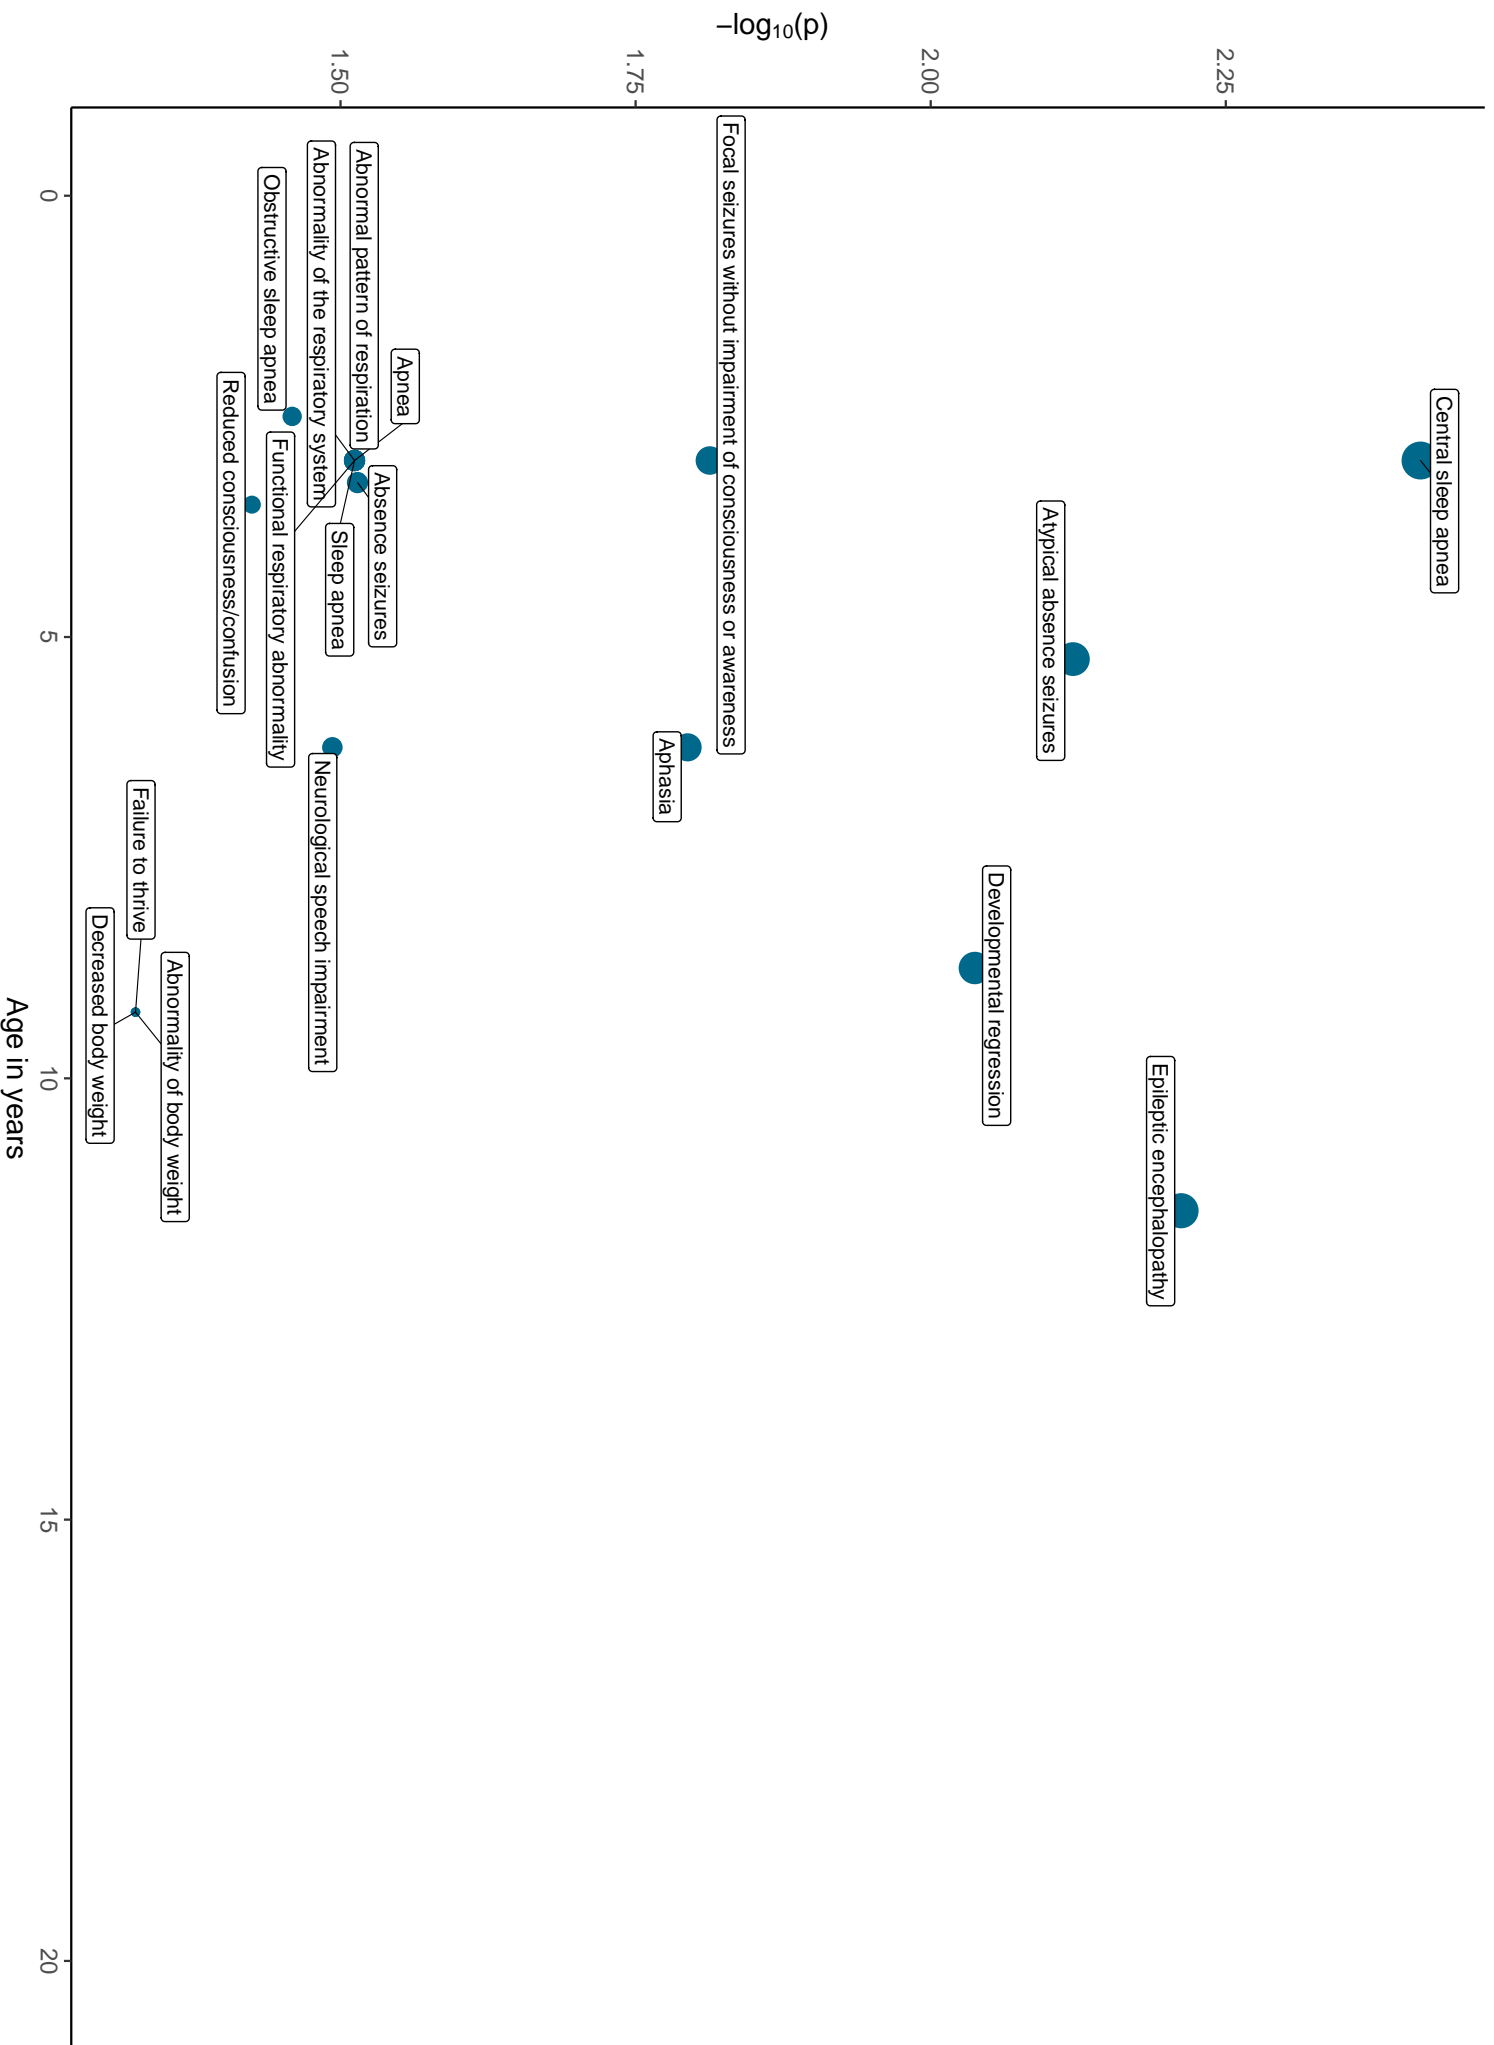

HPO terms associated with GRIN1

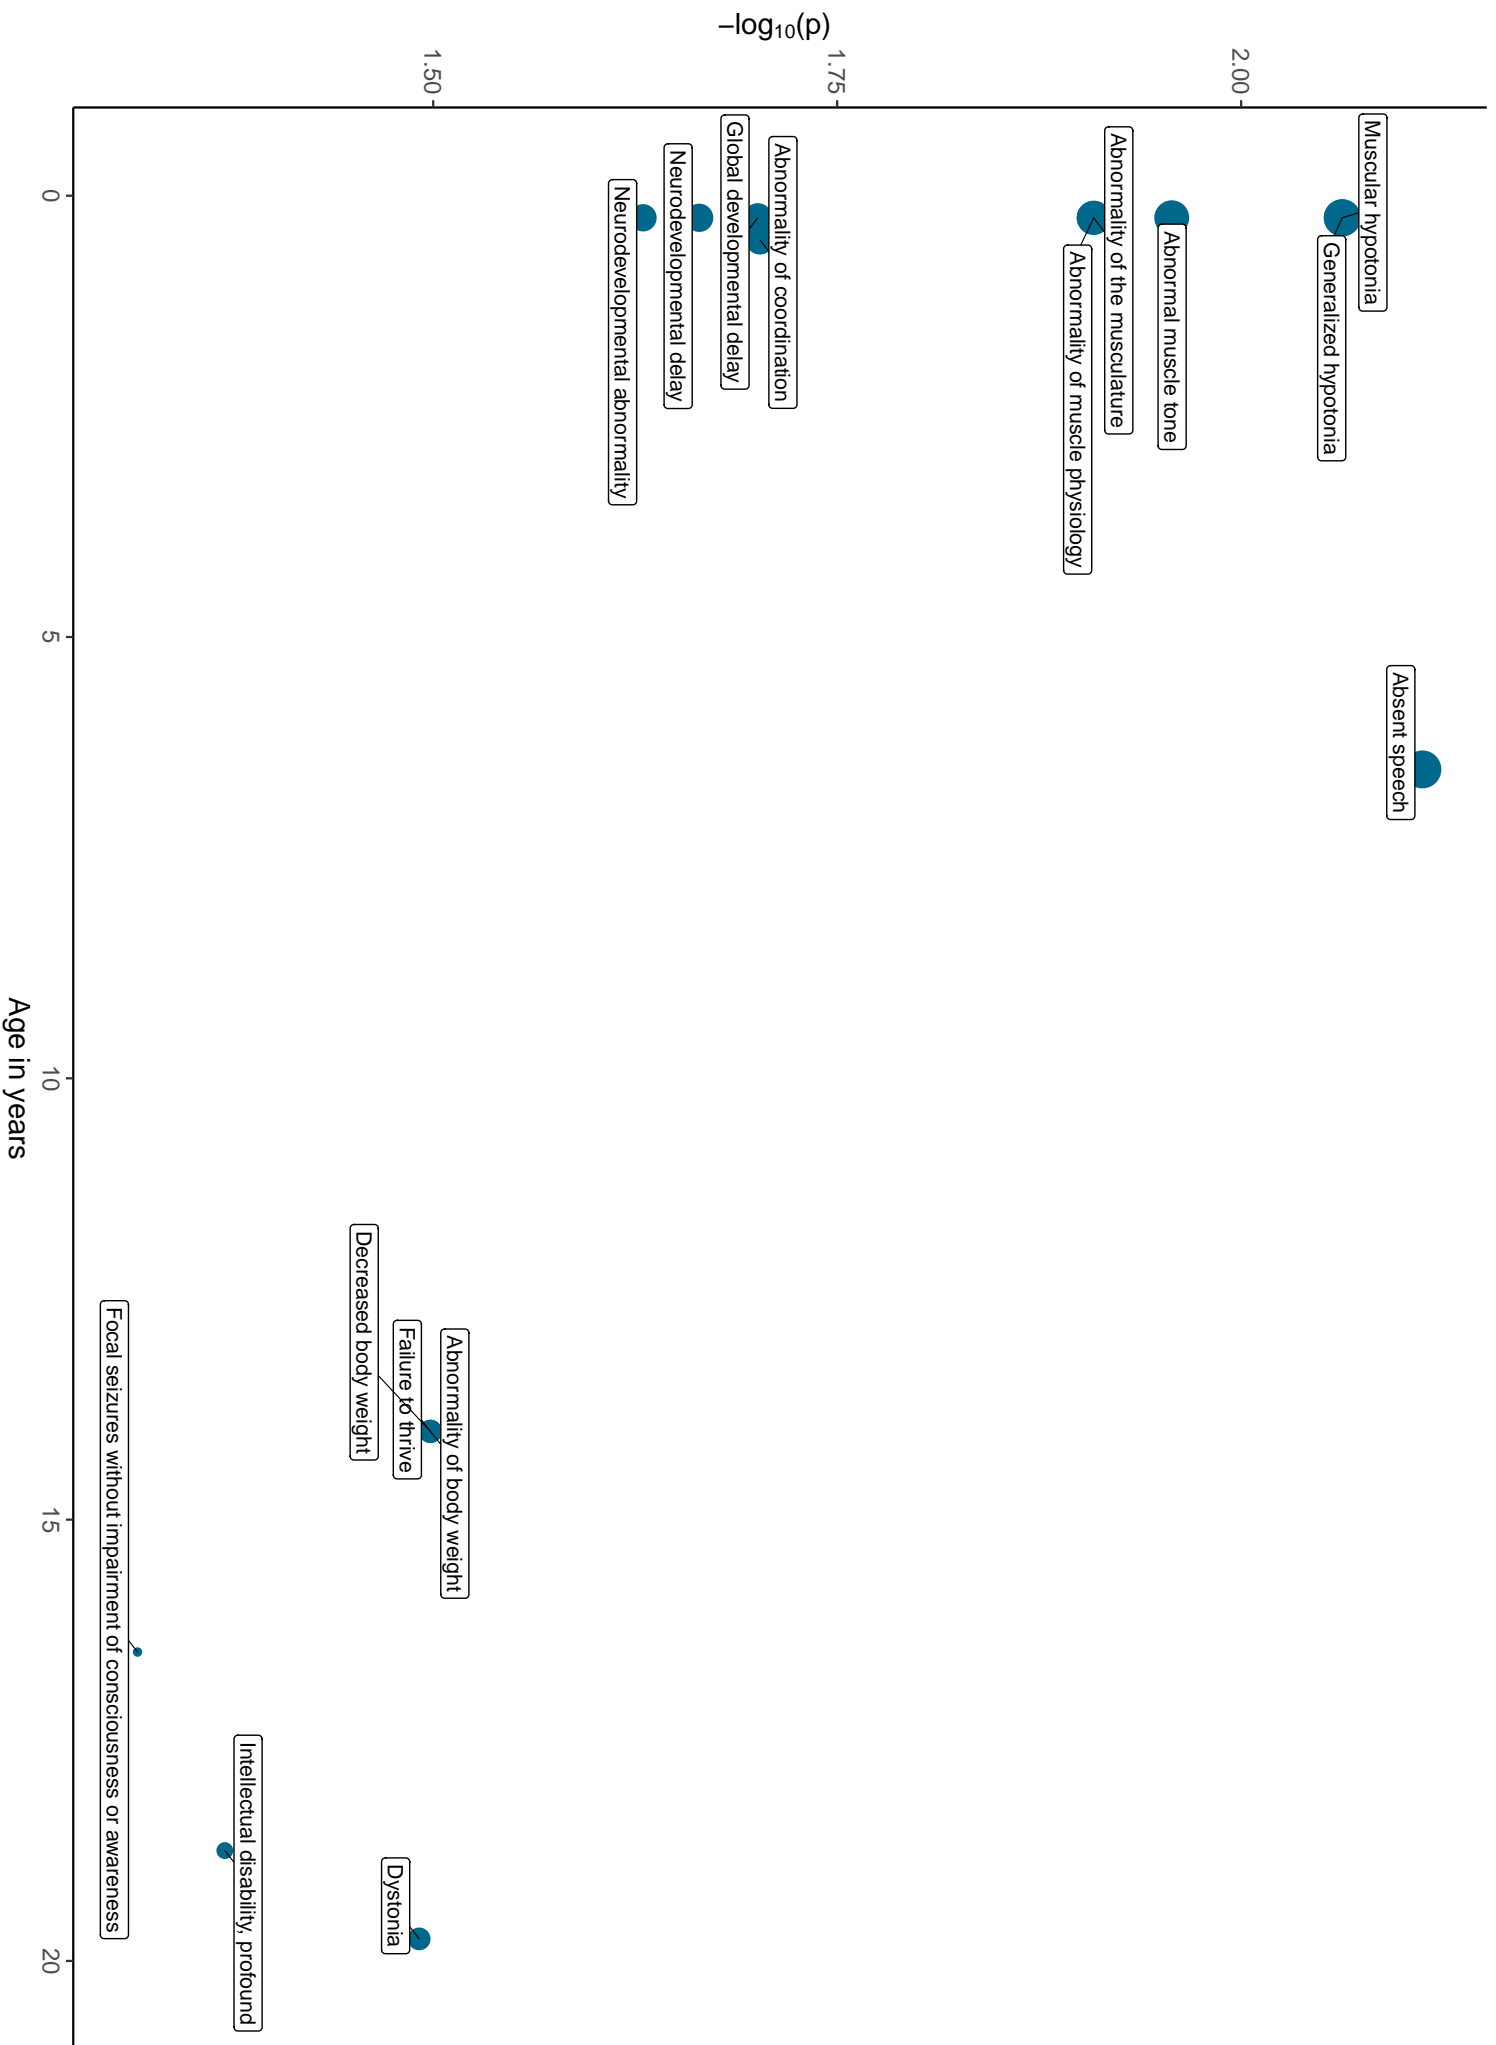

HPD terms associated with PCDH19

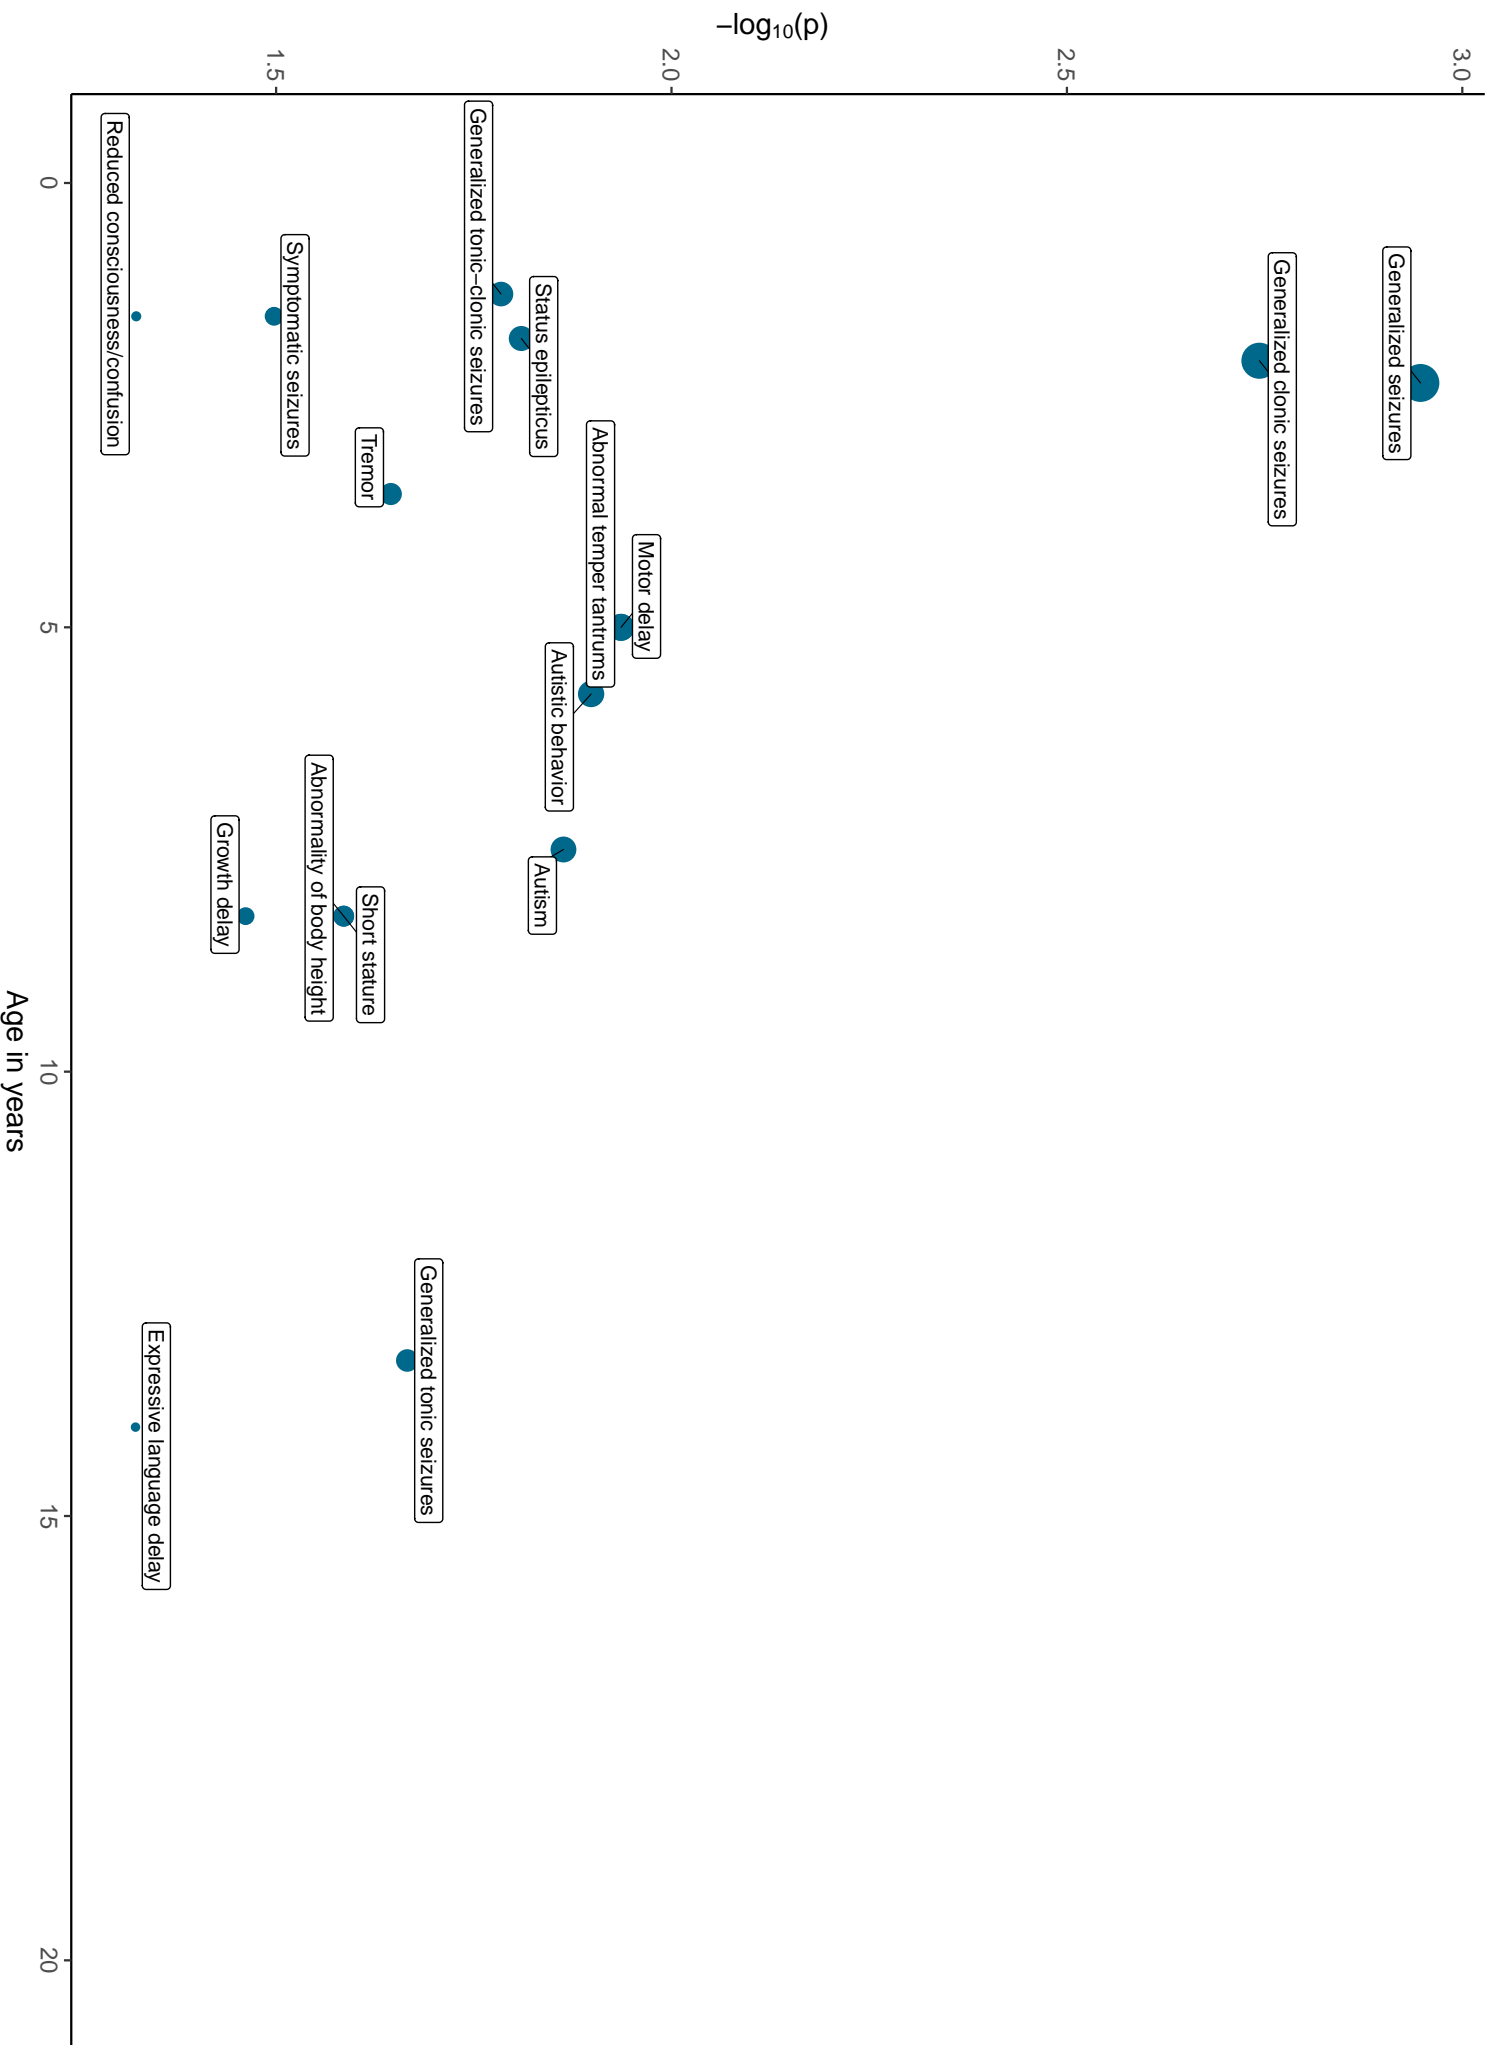

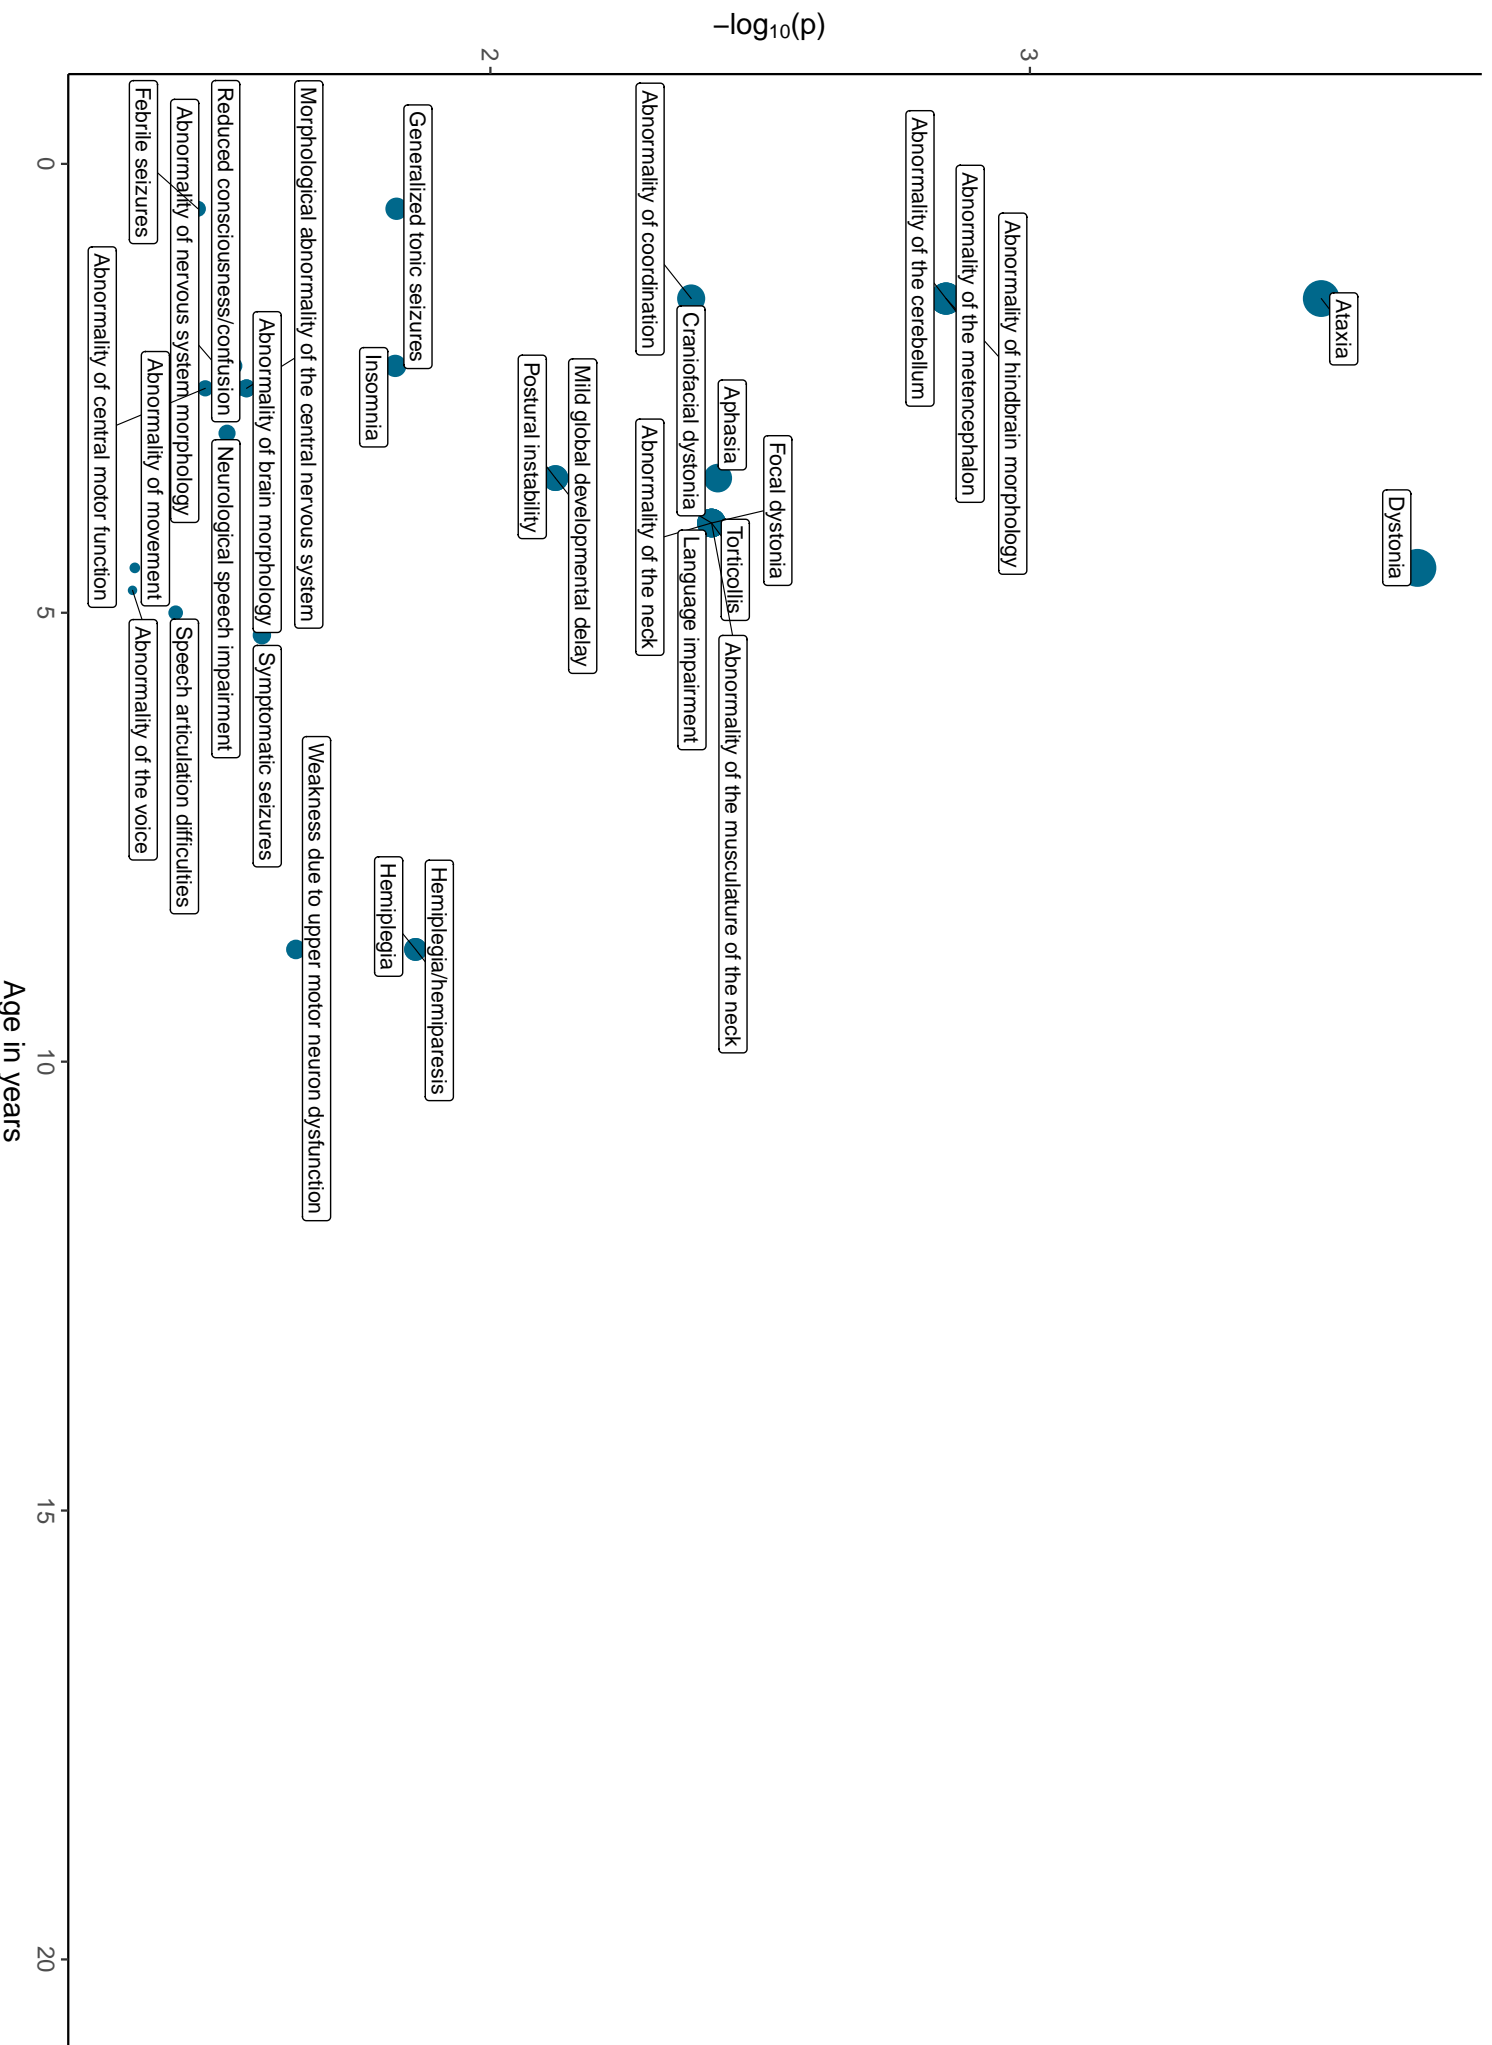

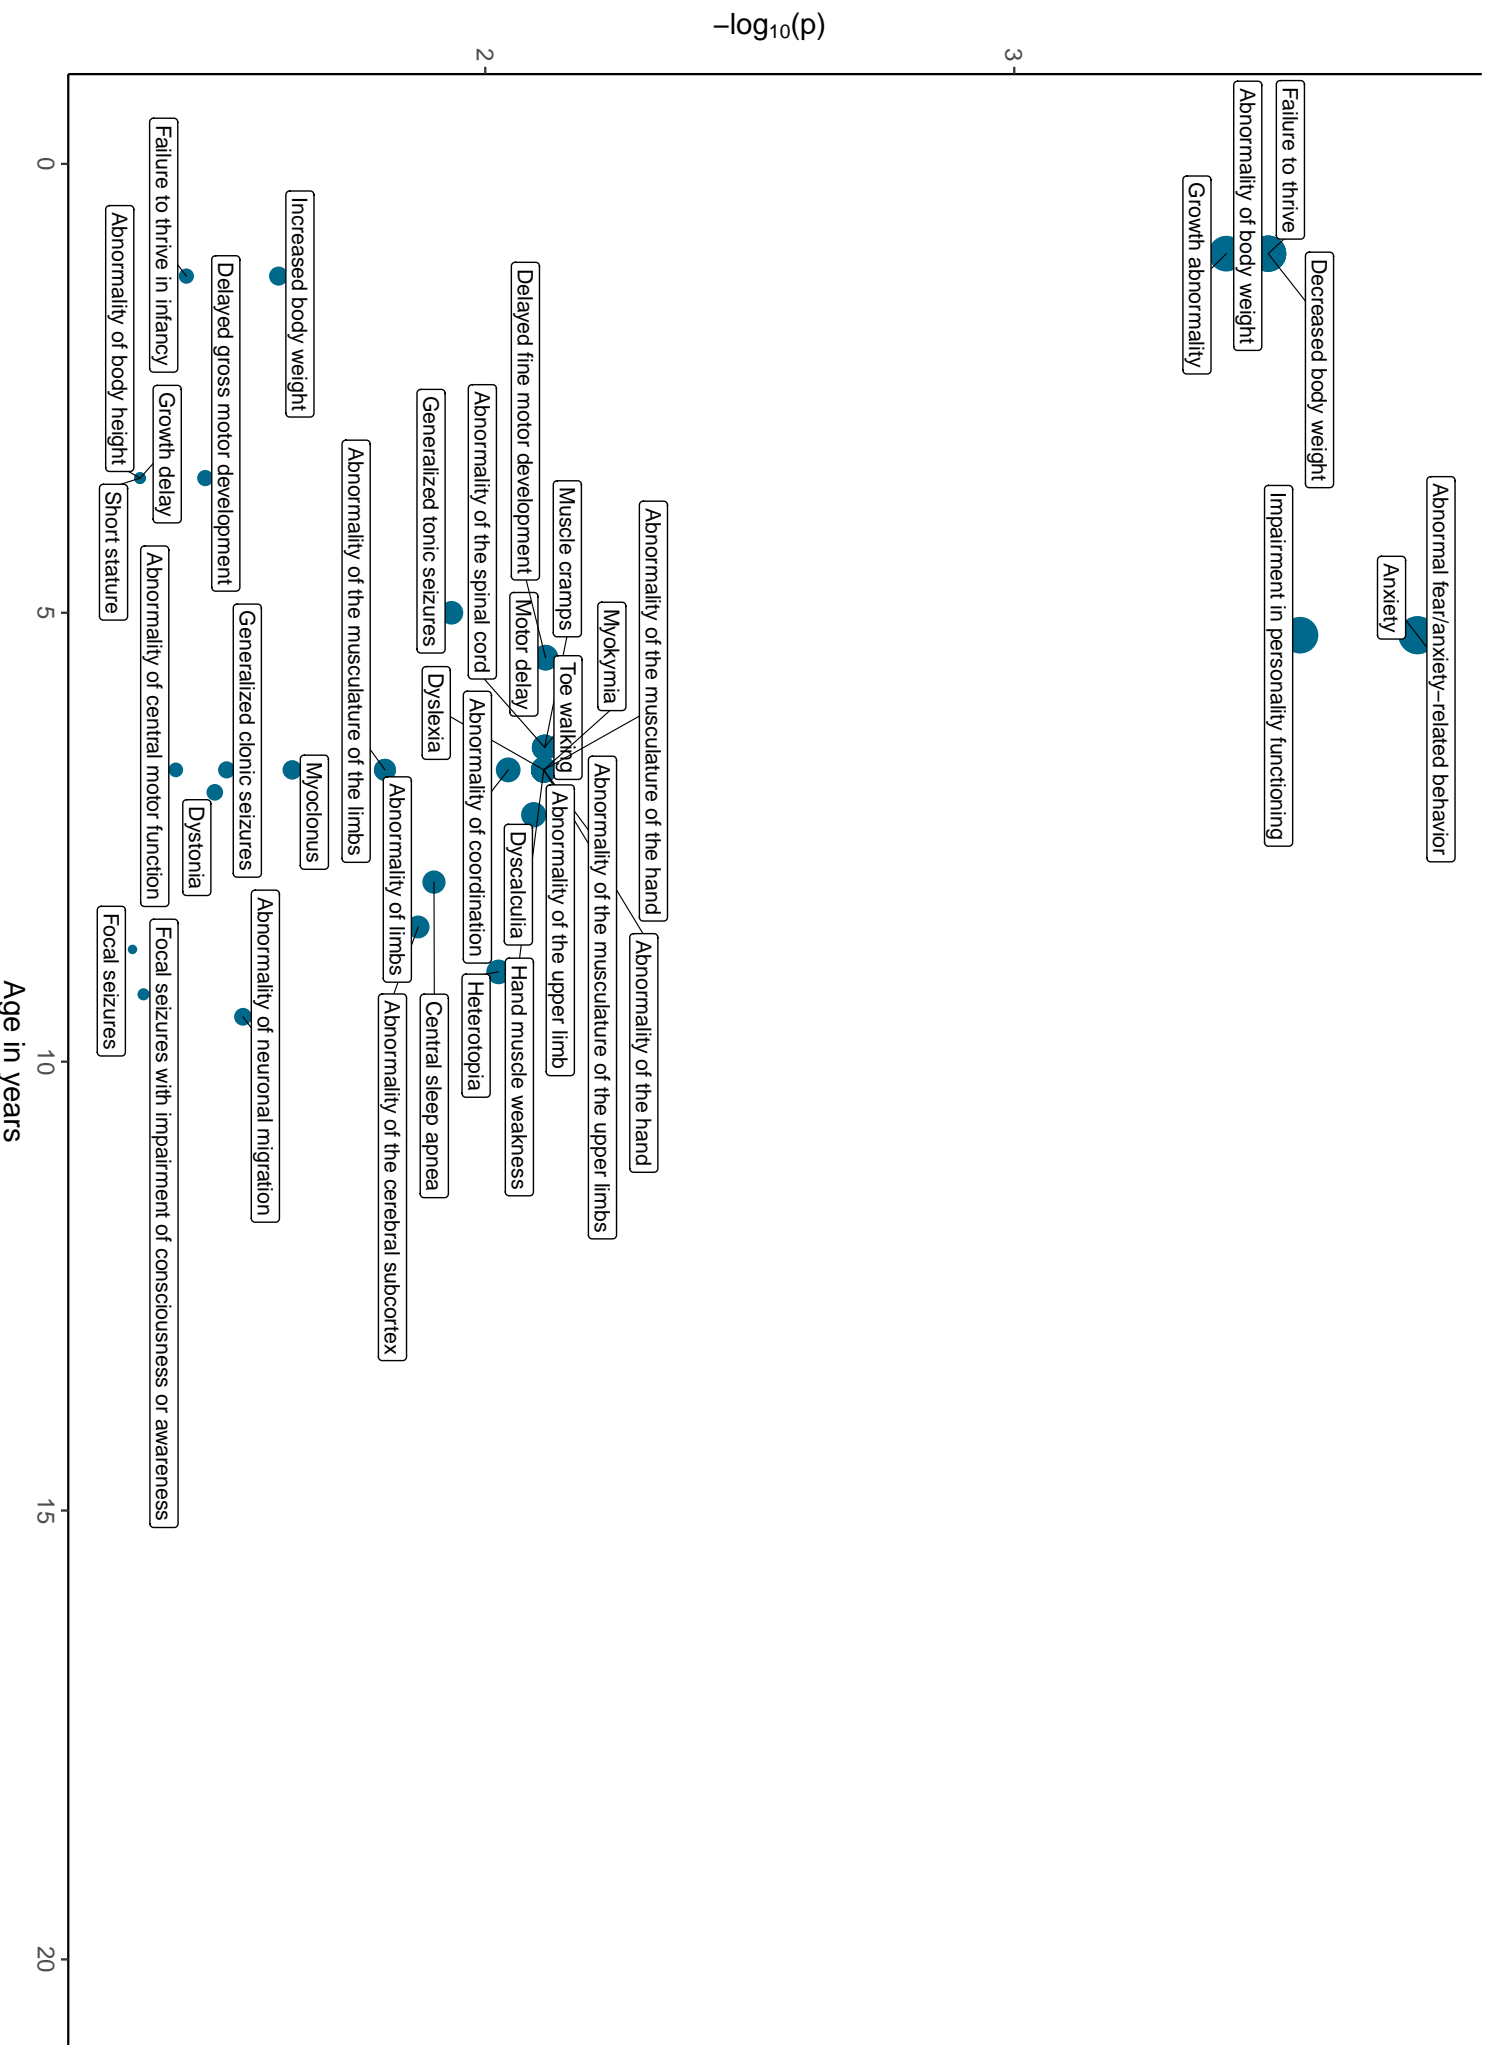

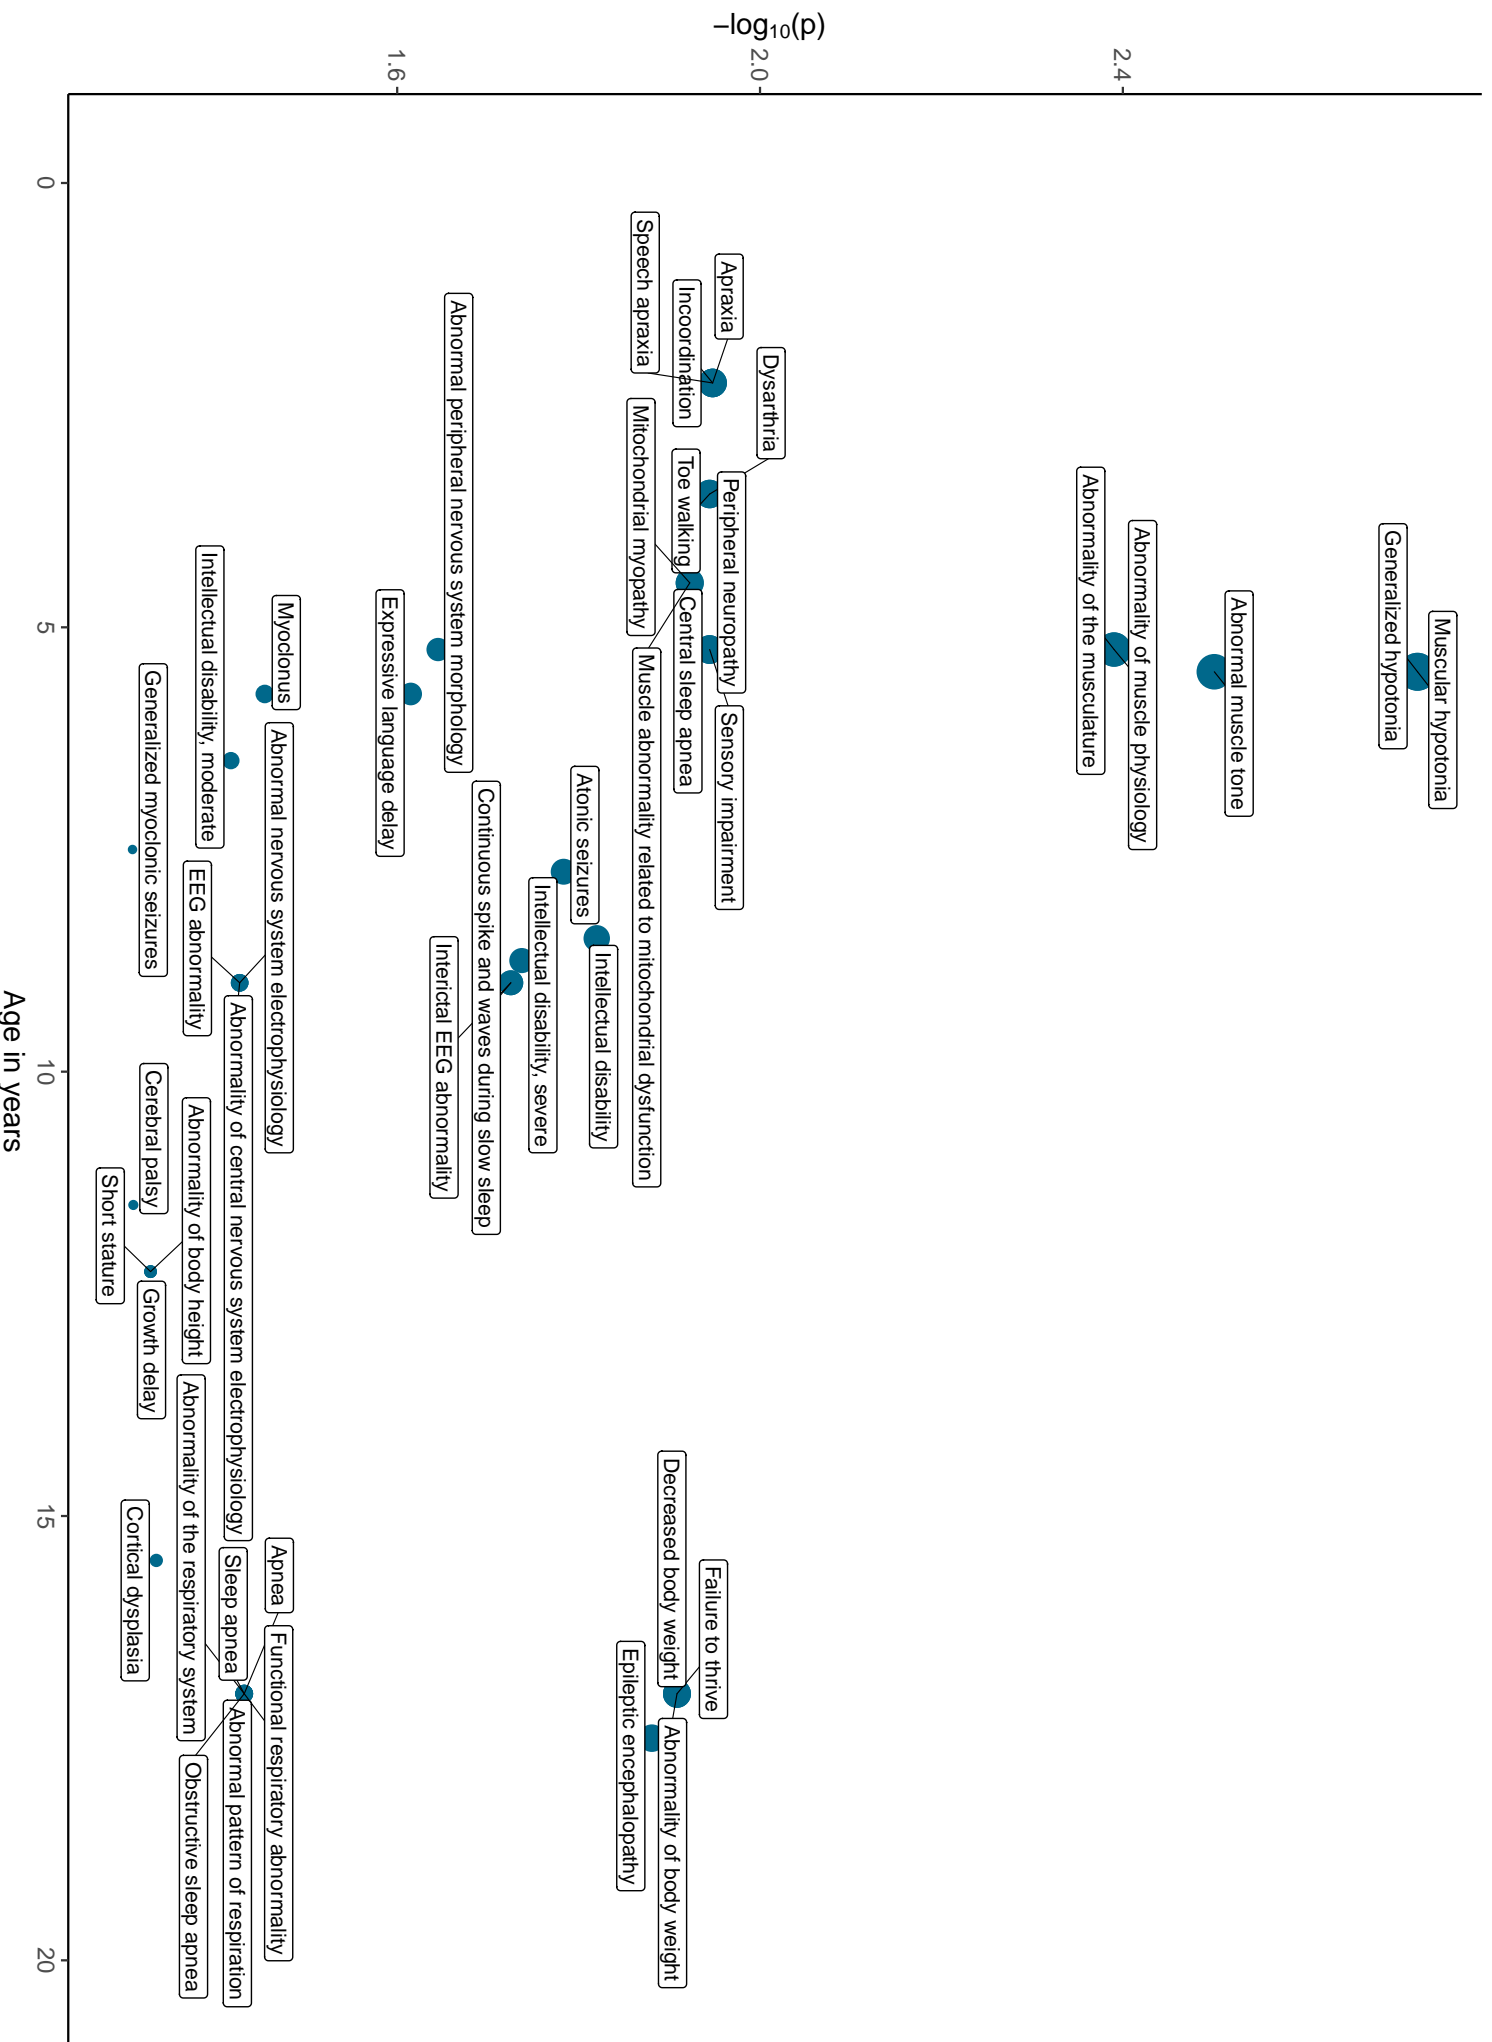



*HPO terms associated with PRR12*

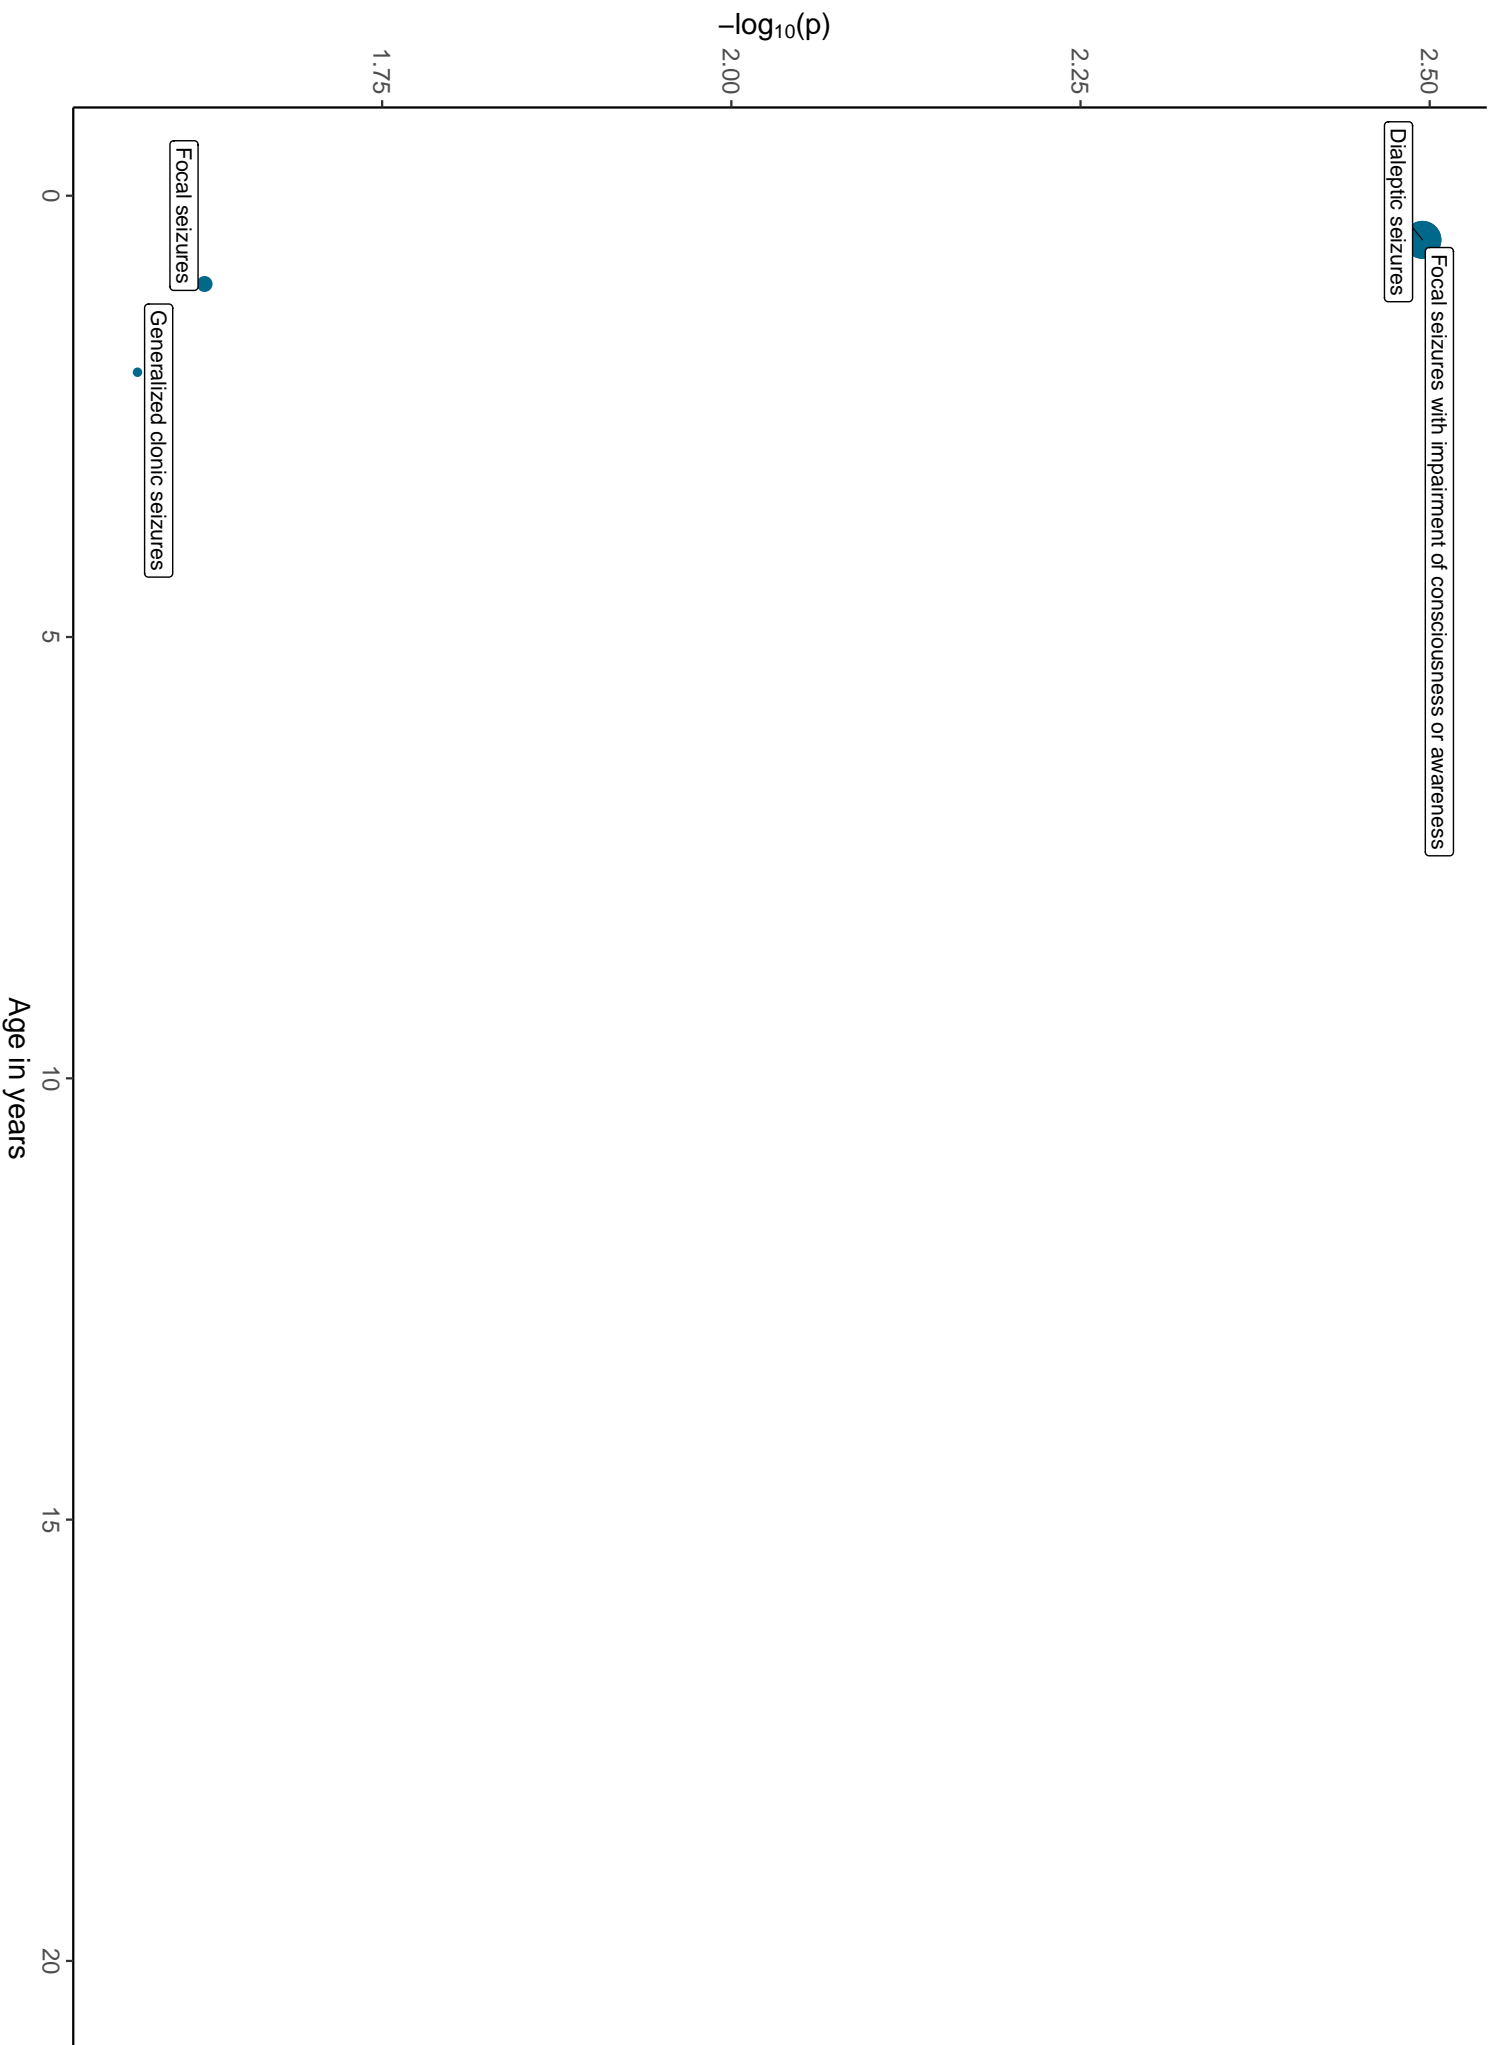

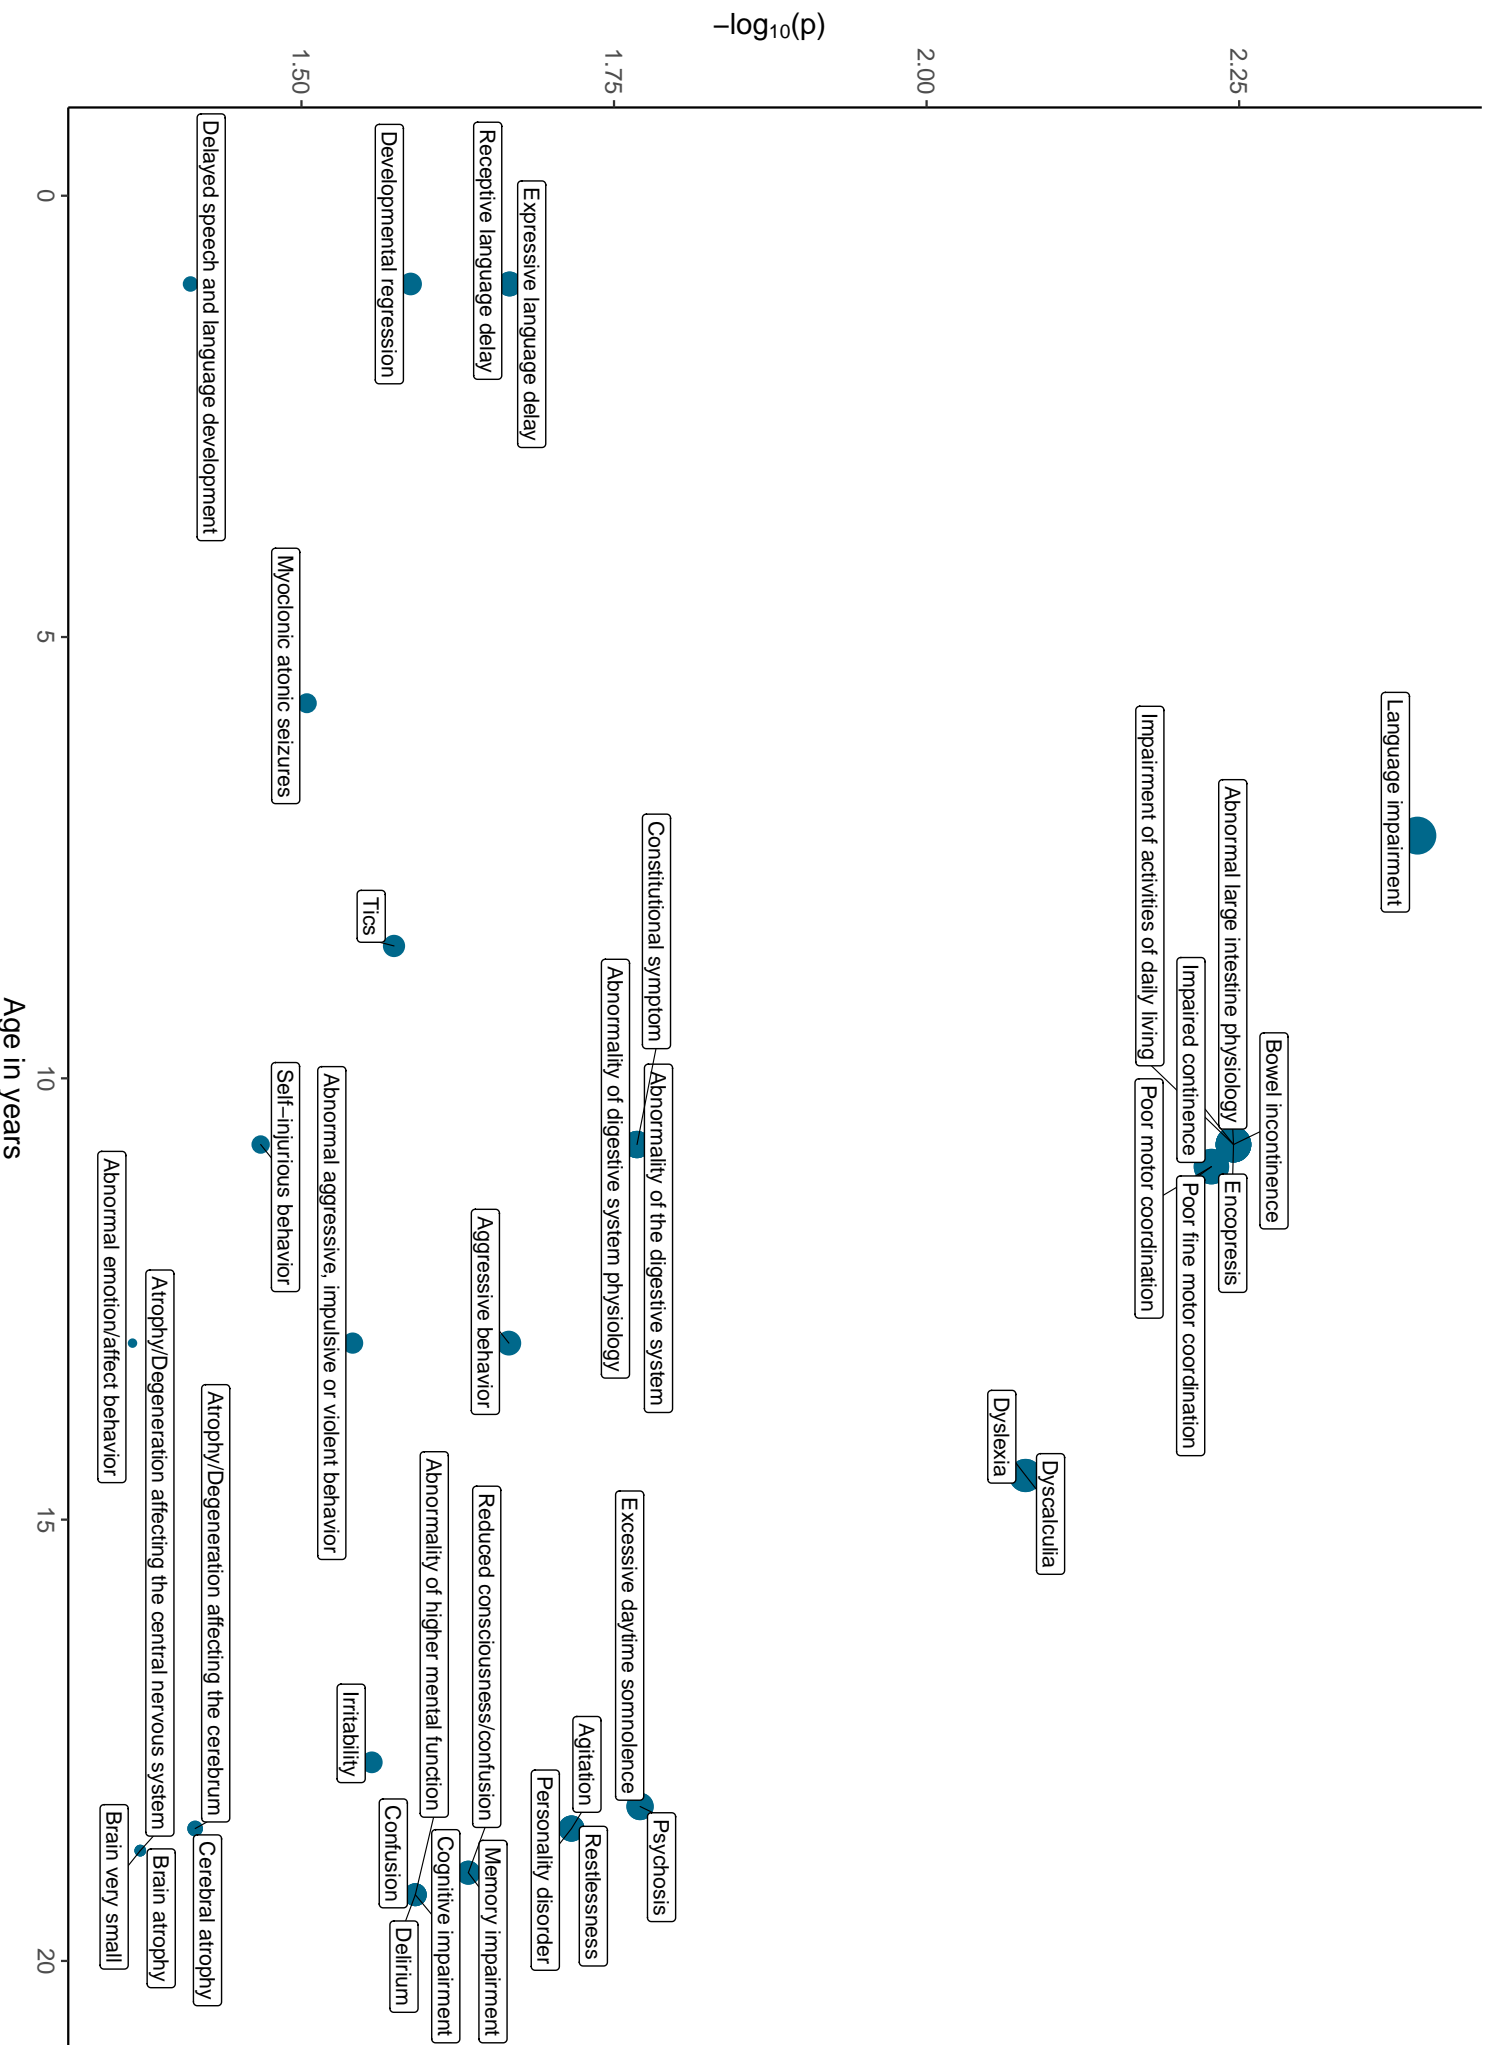

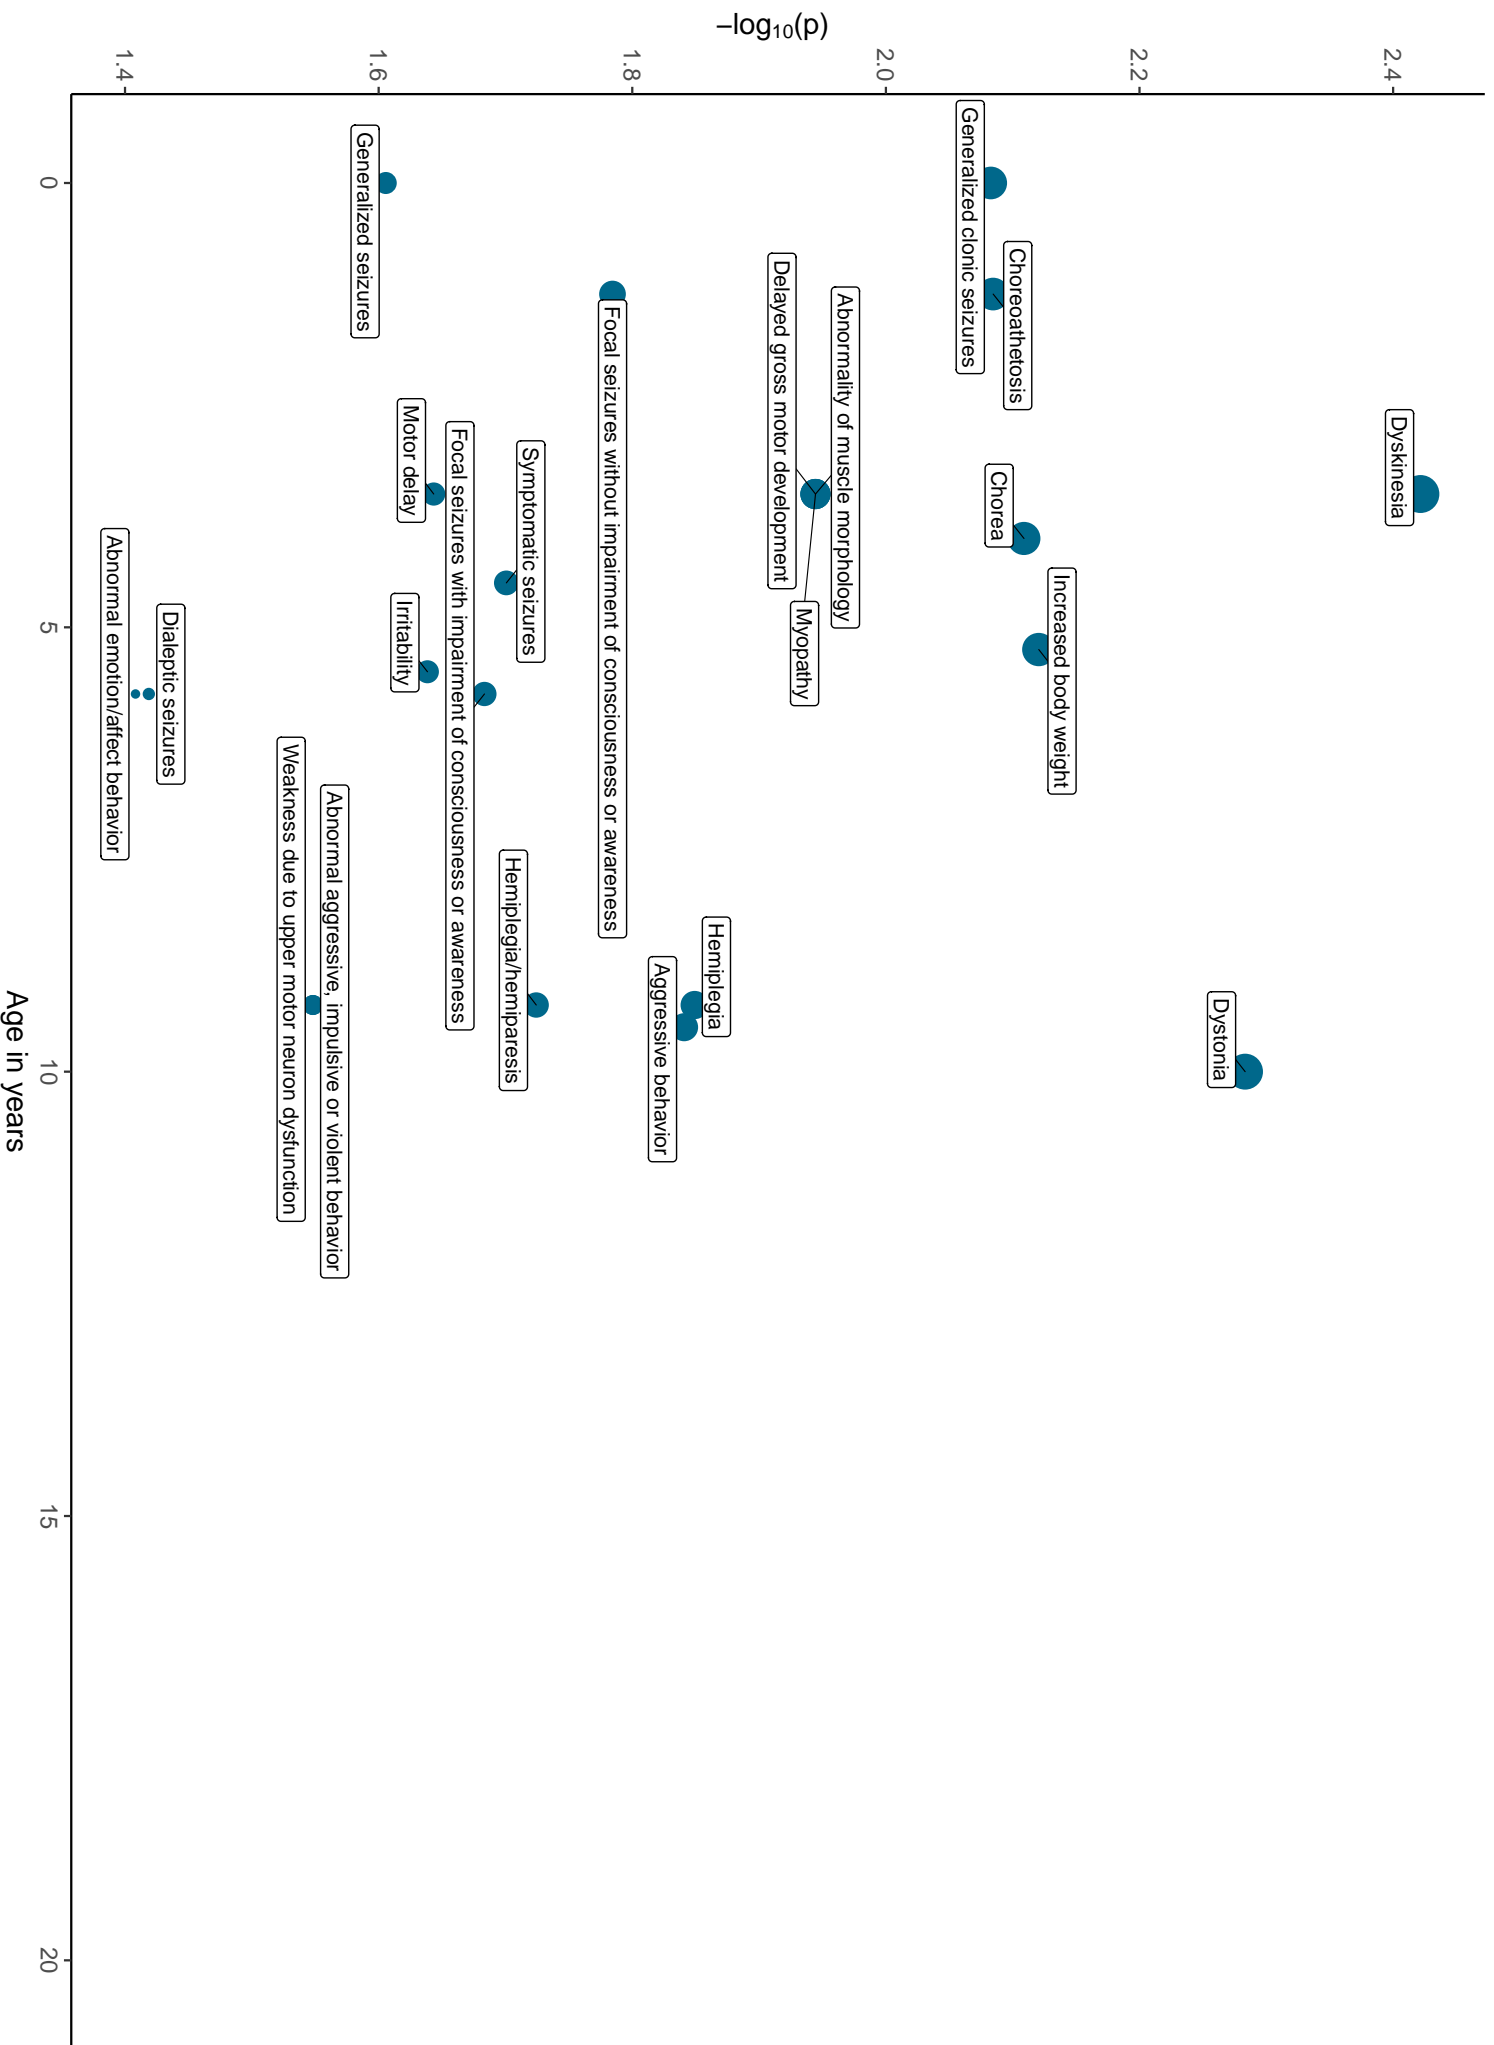

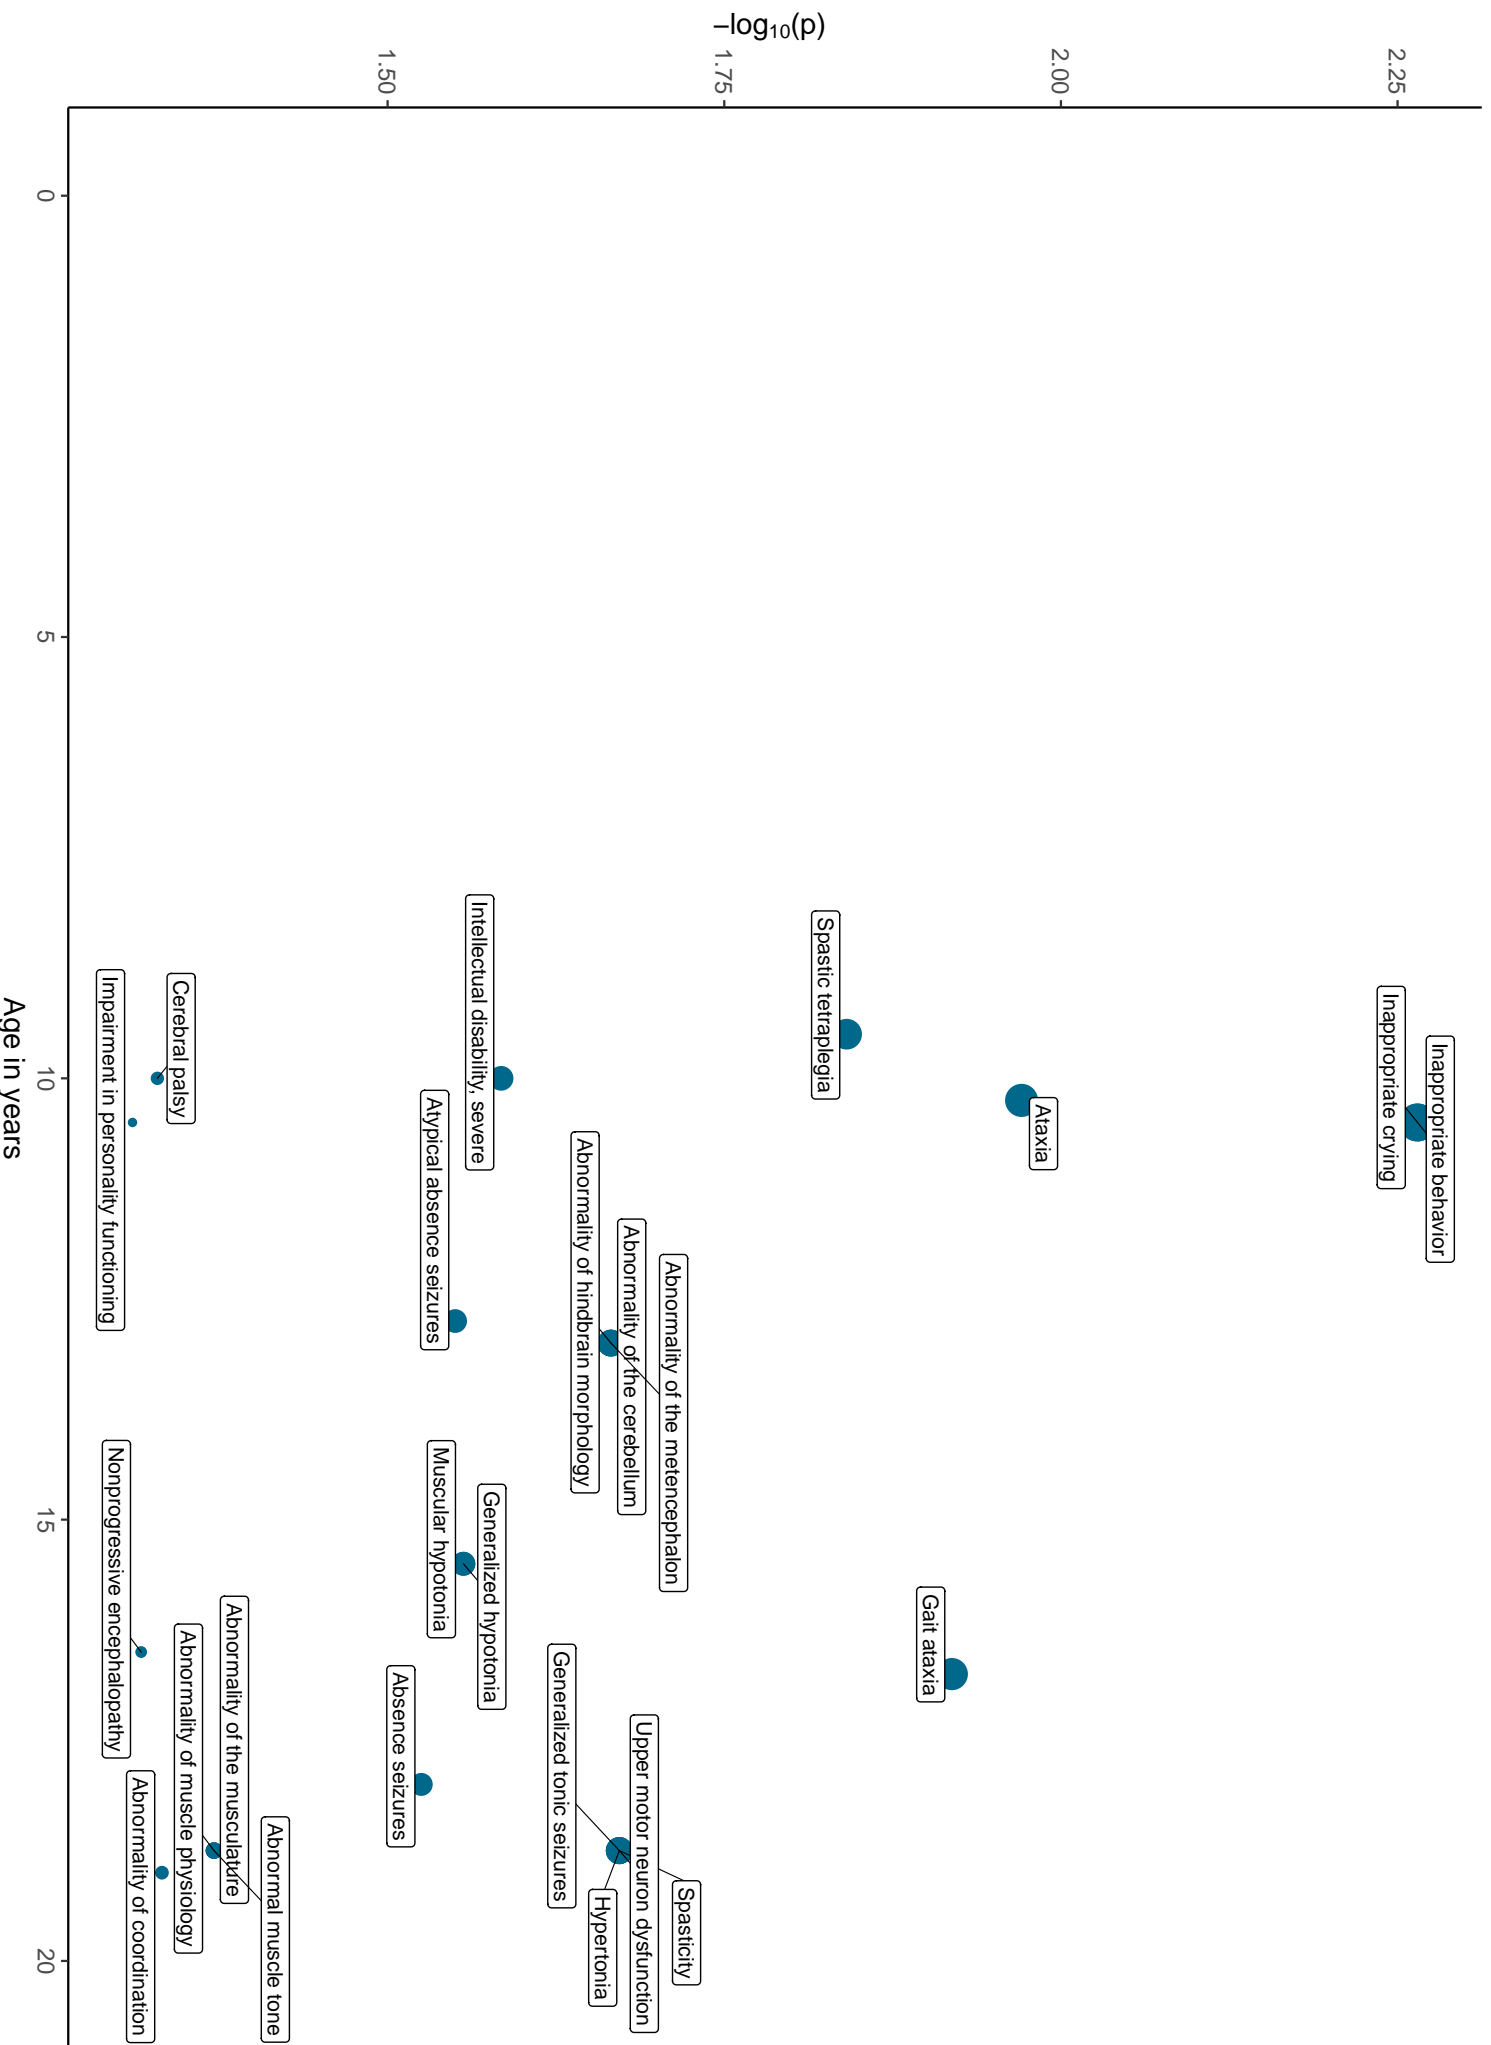

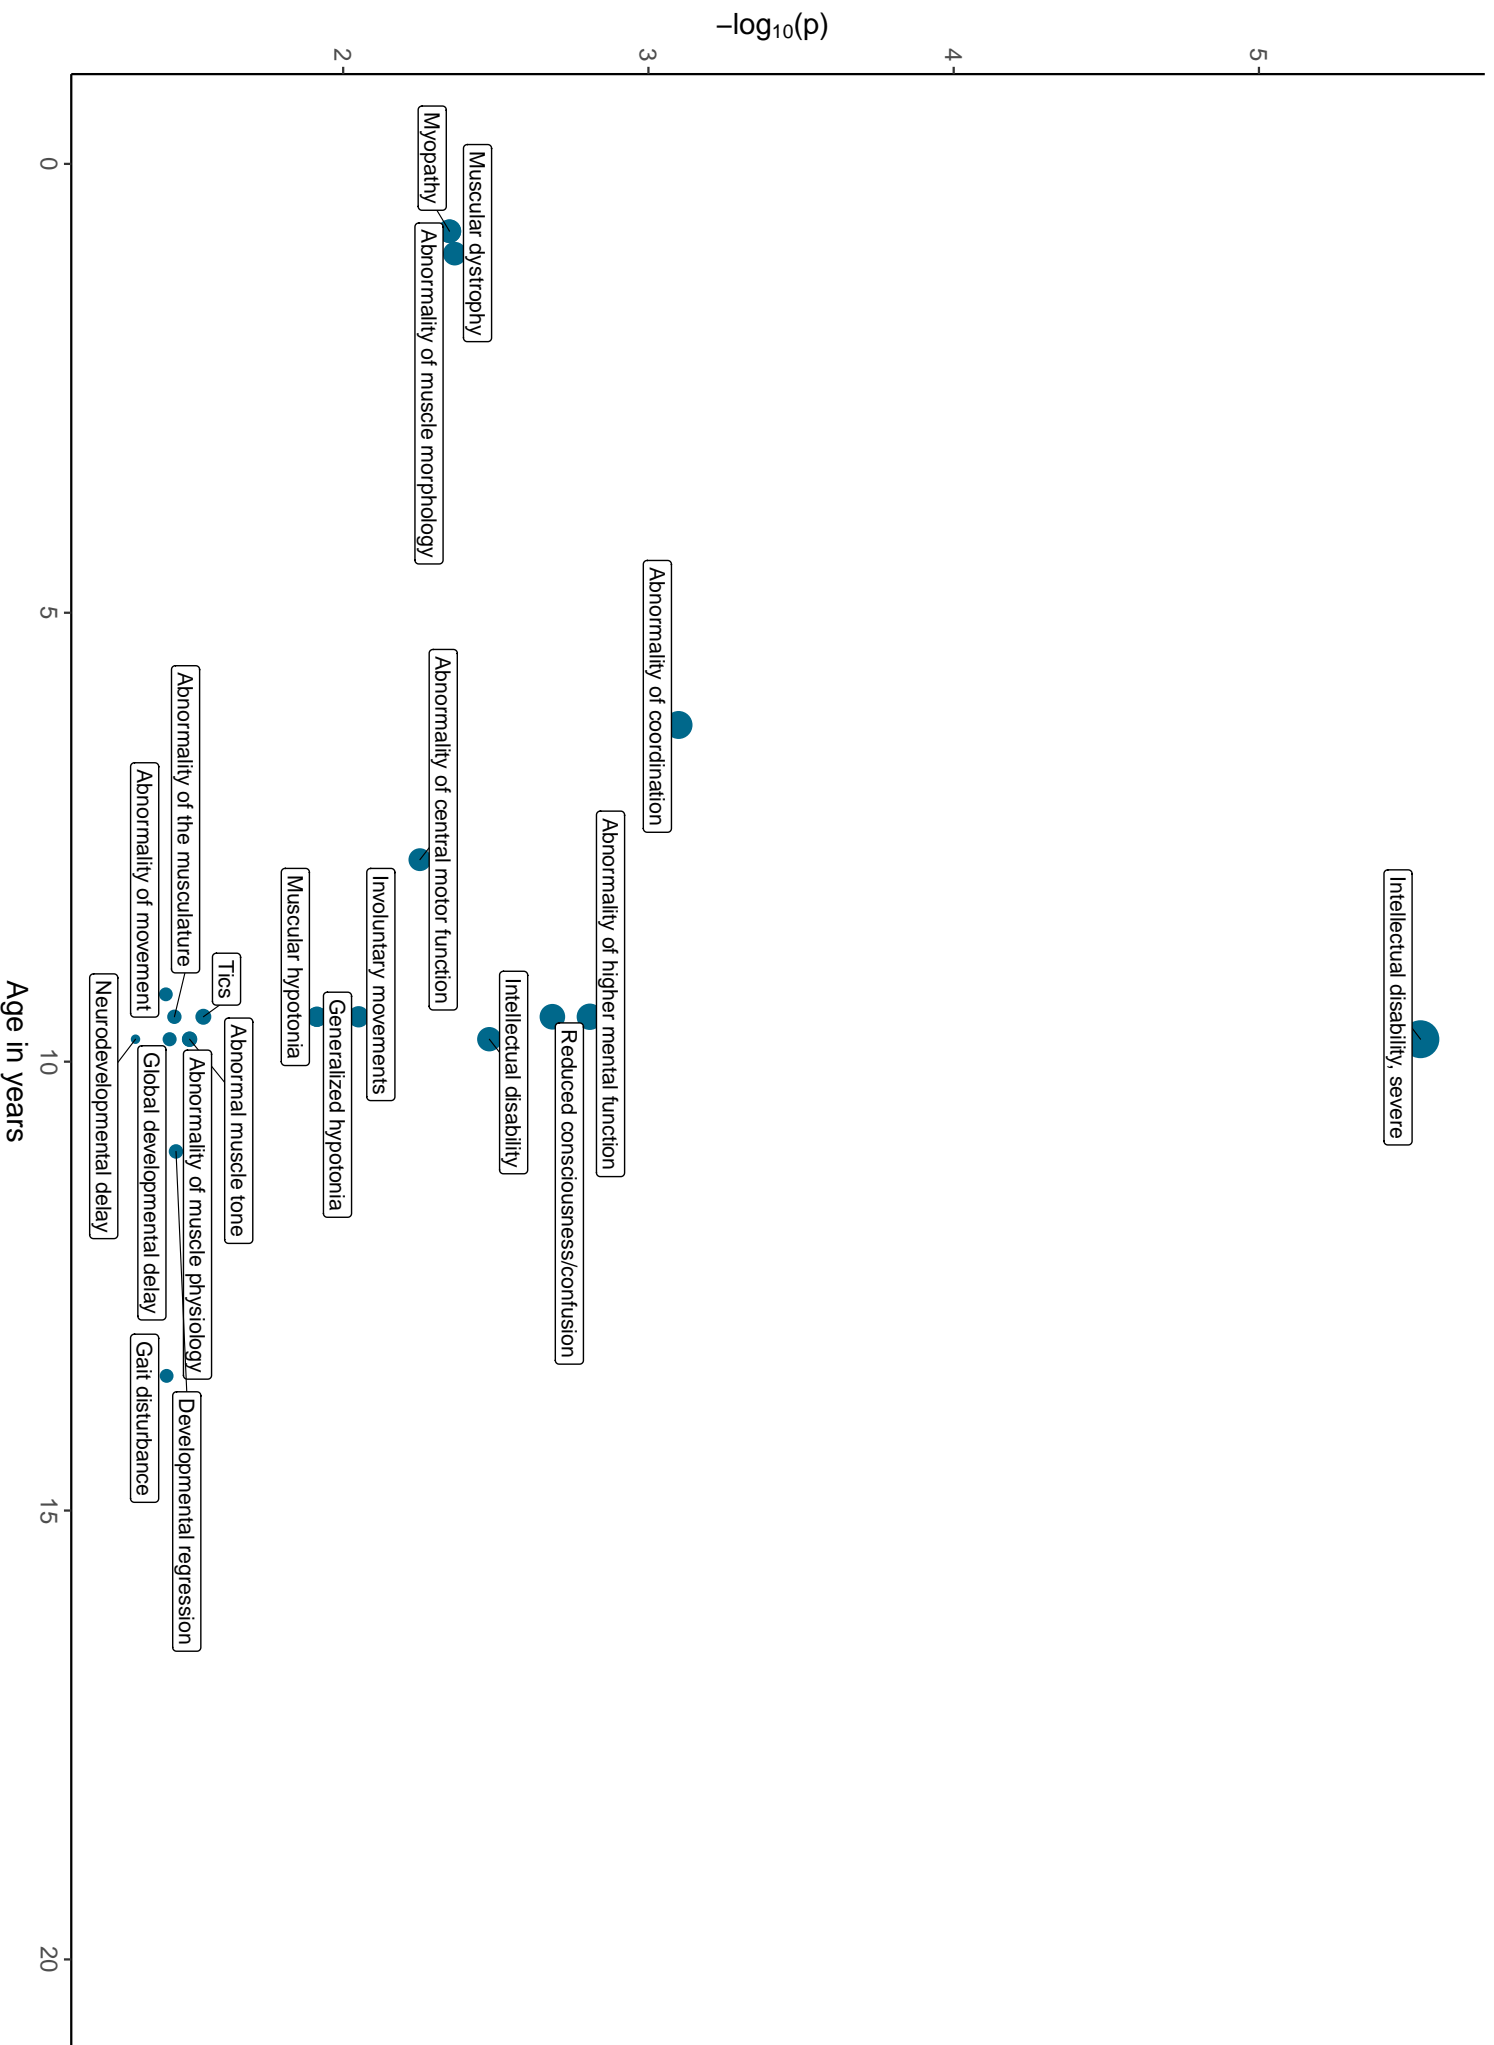

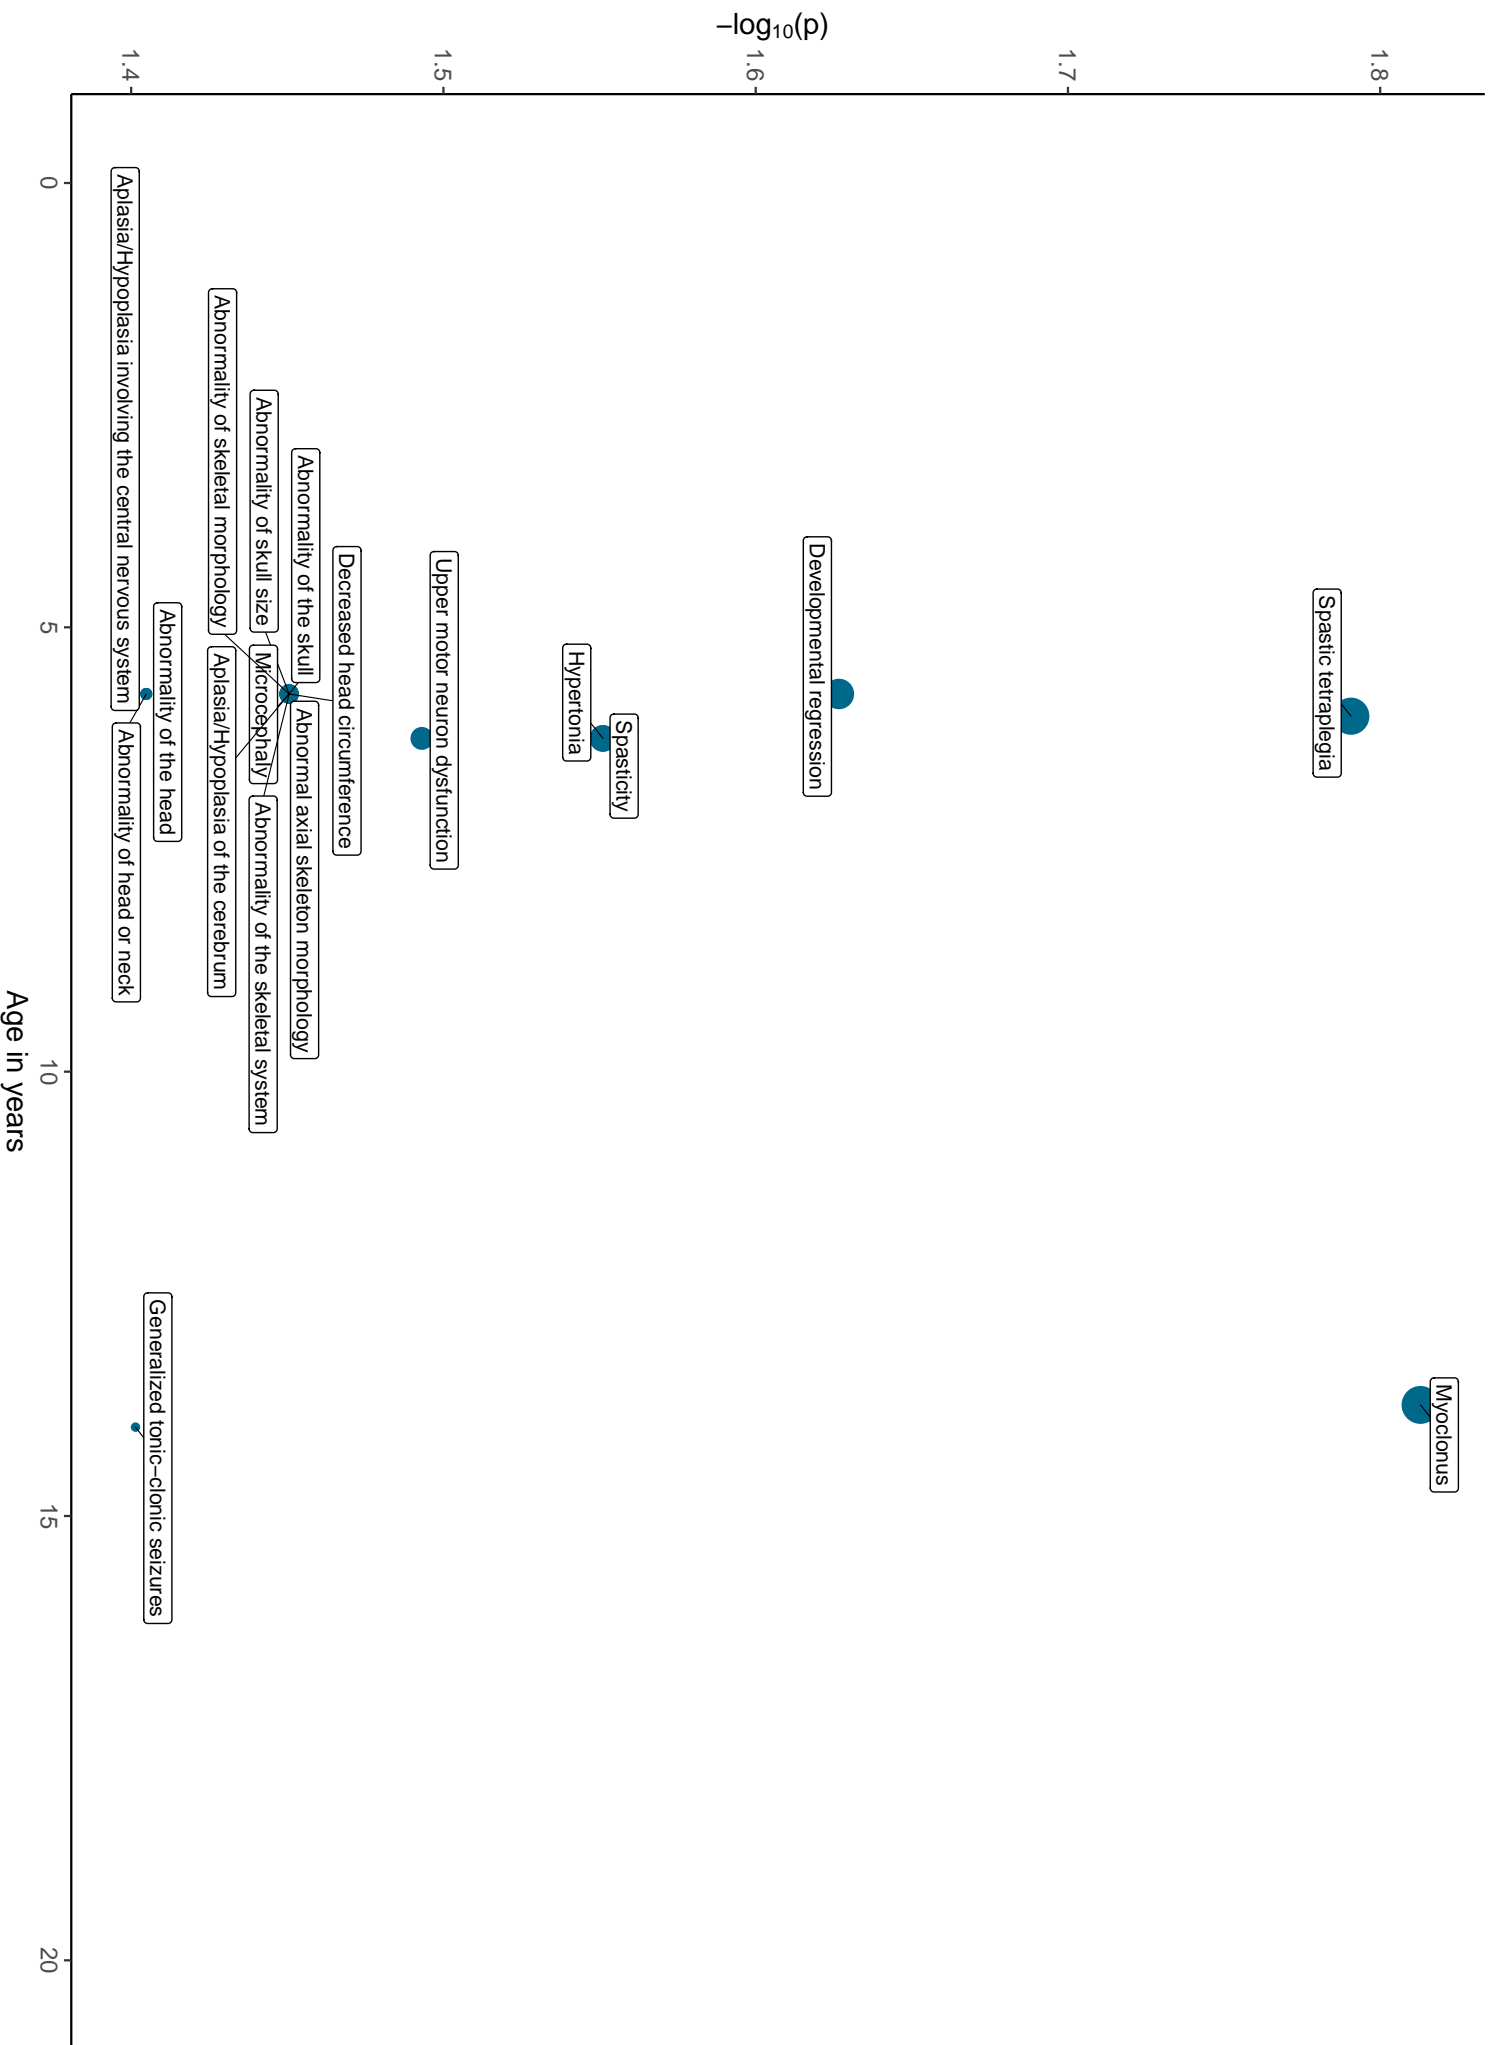

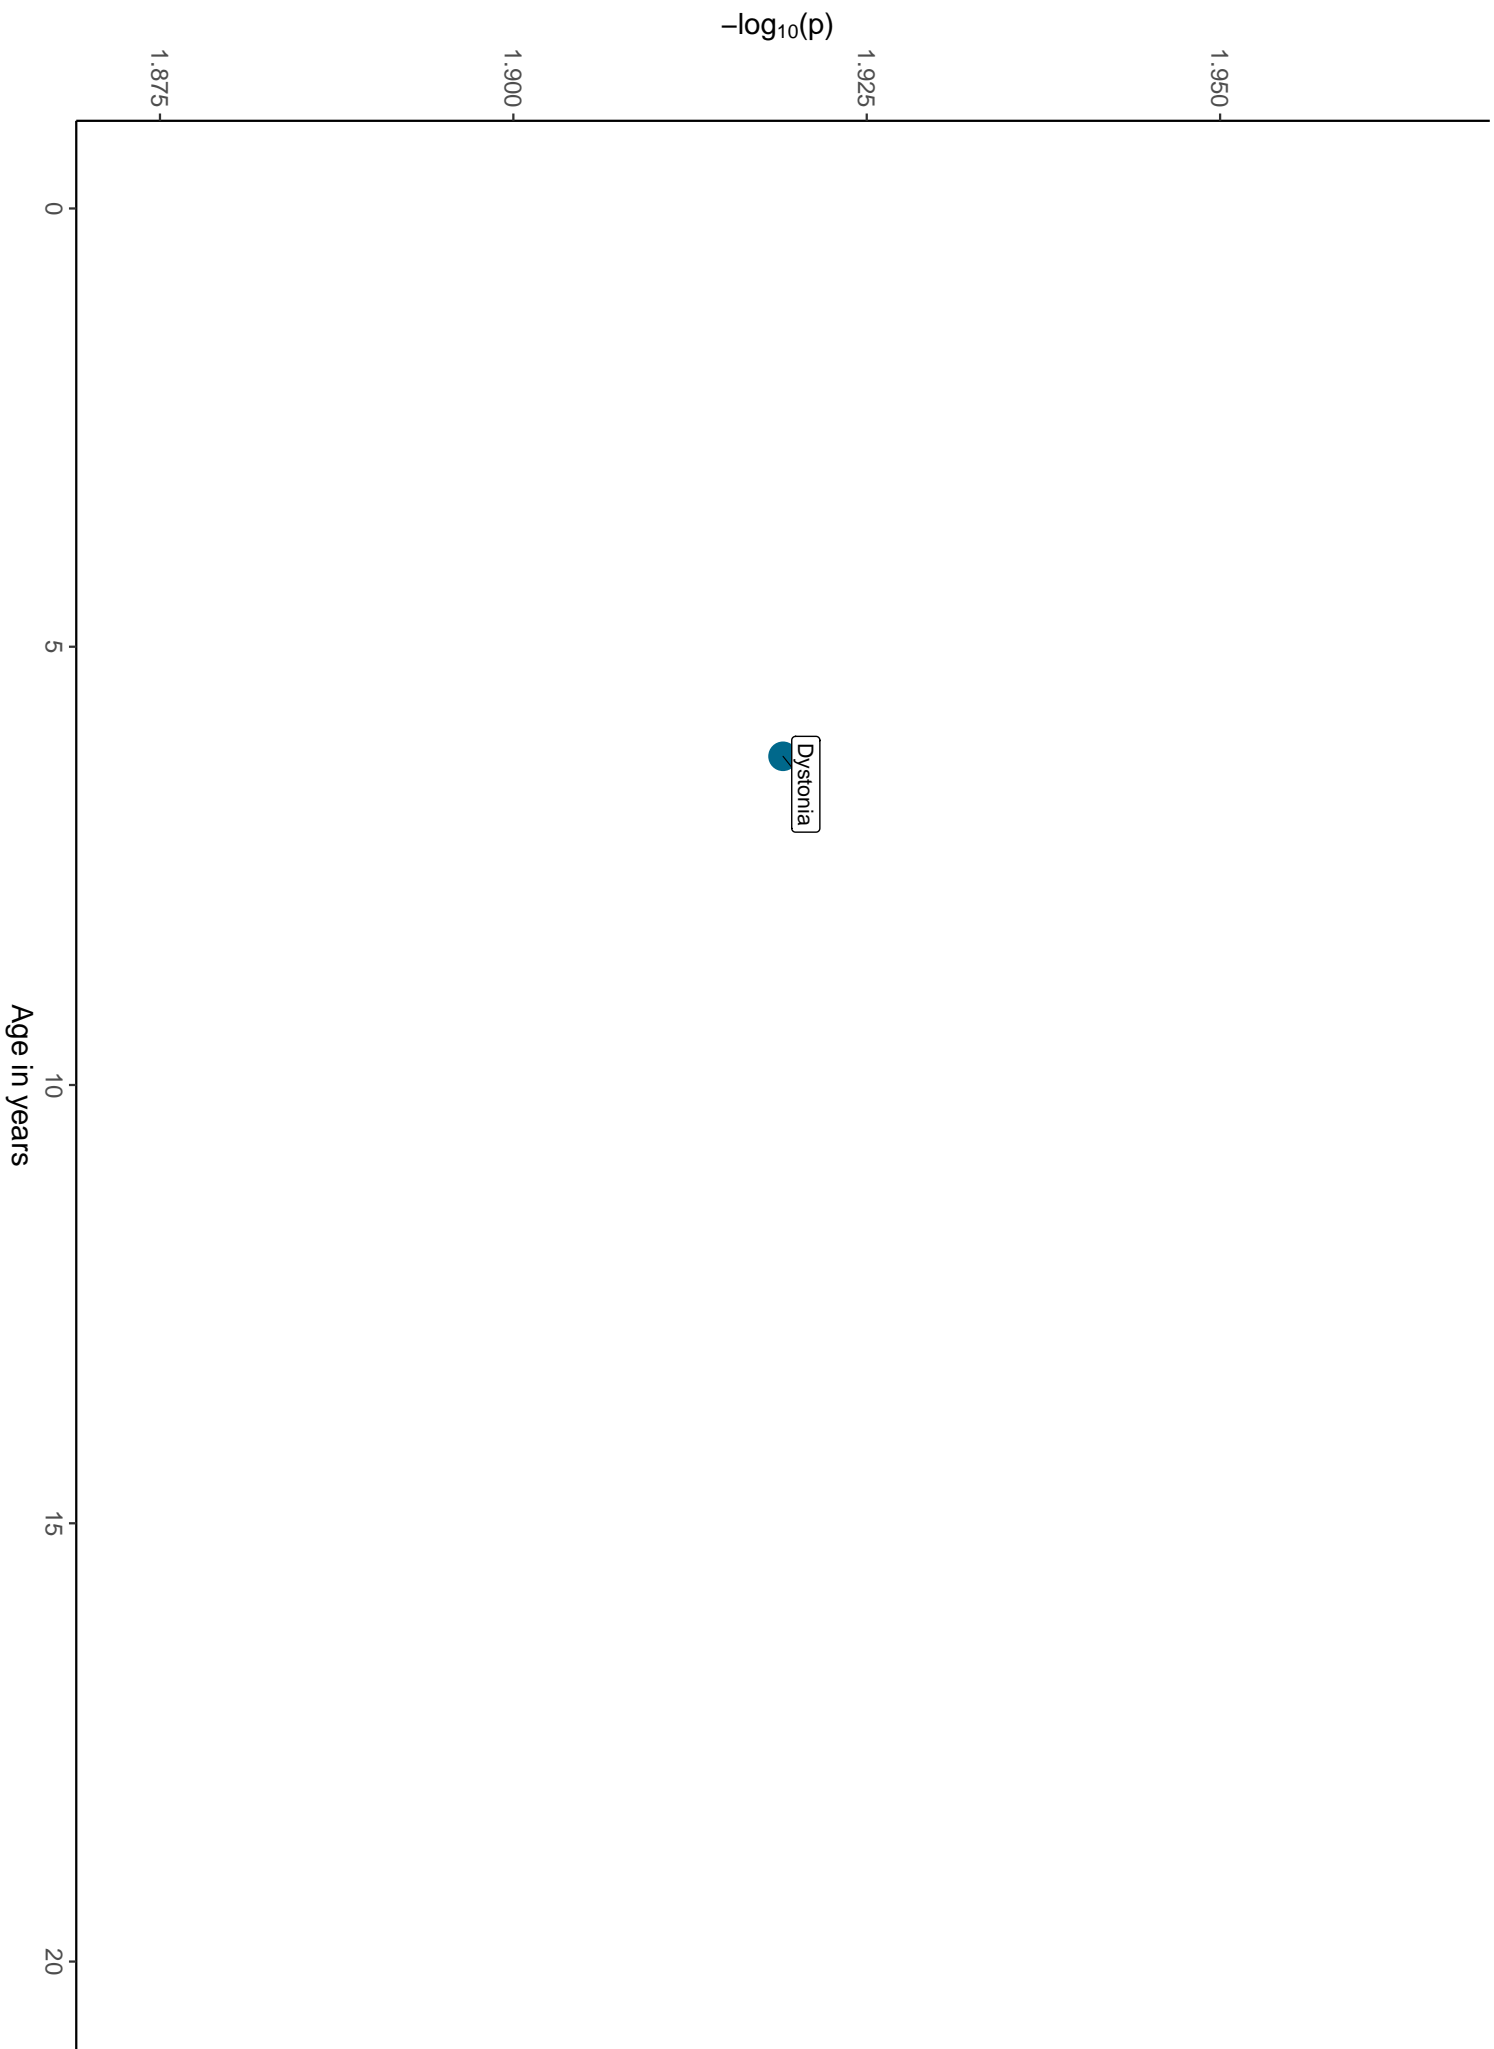

HPO terms associated with DYNC1H1

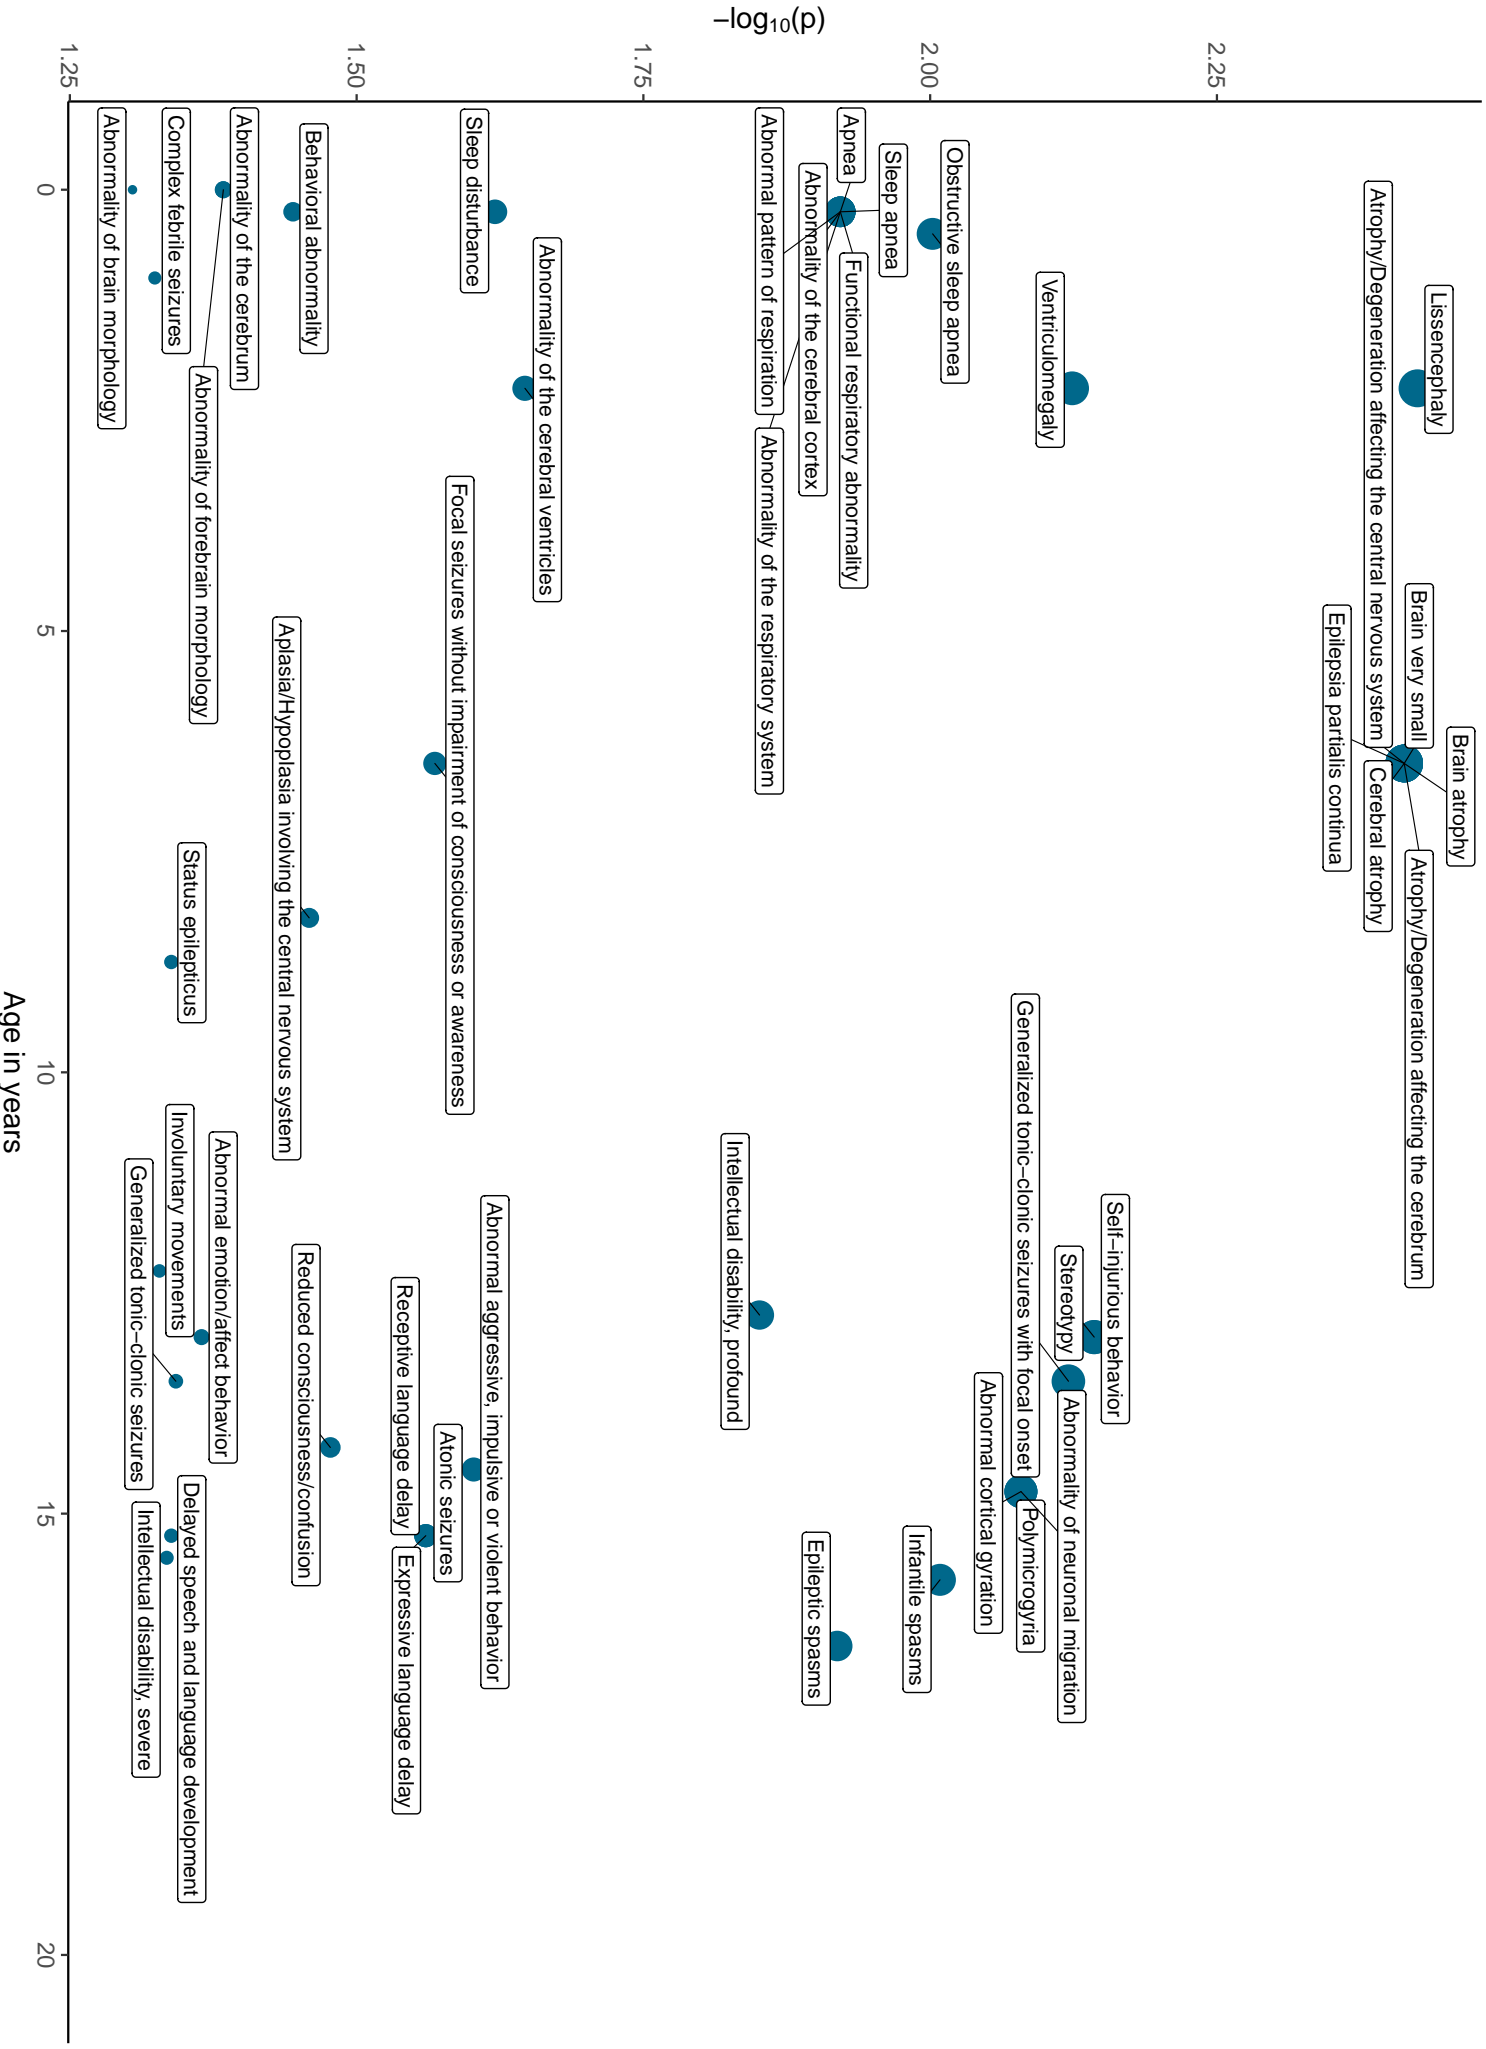



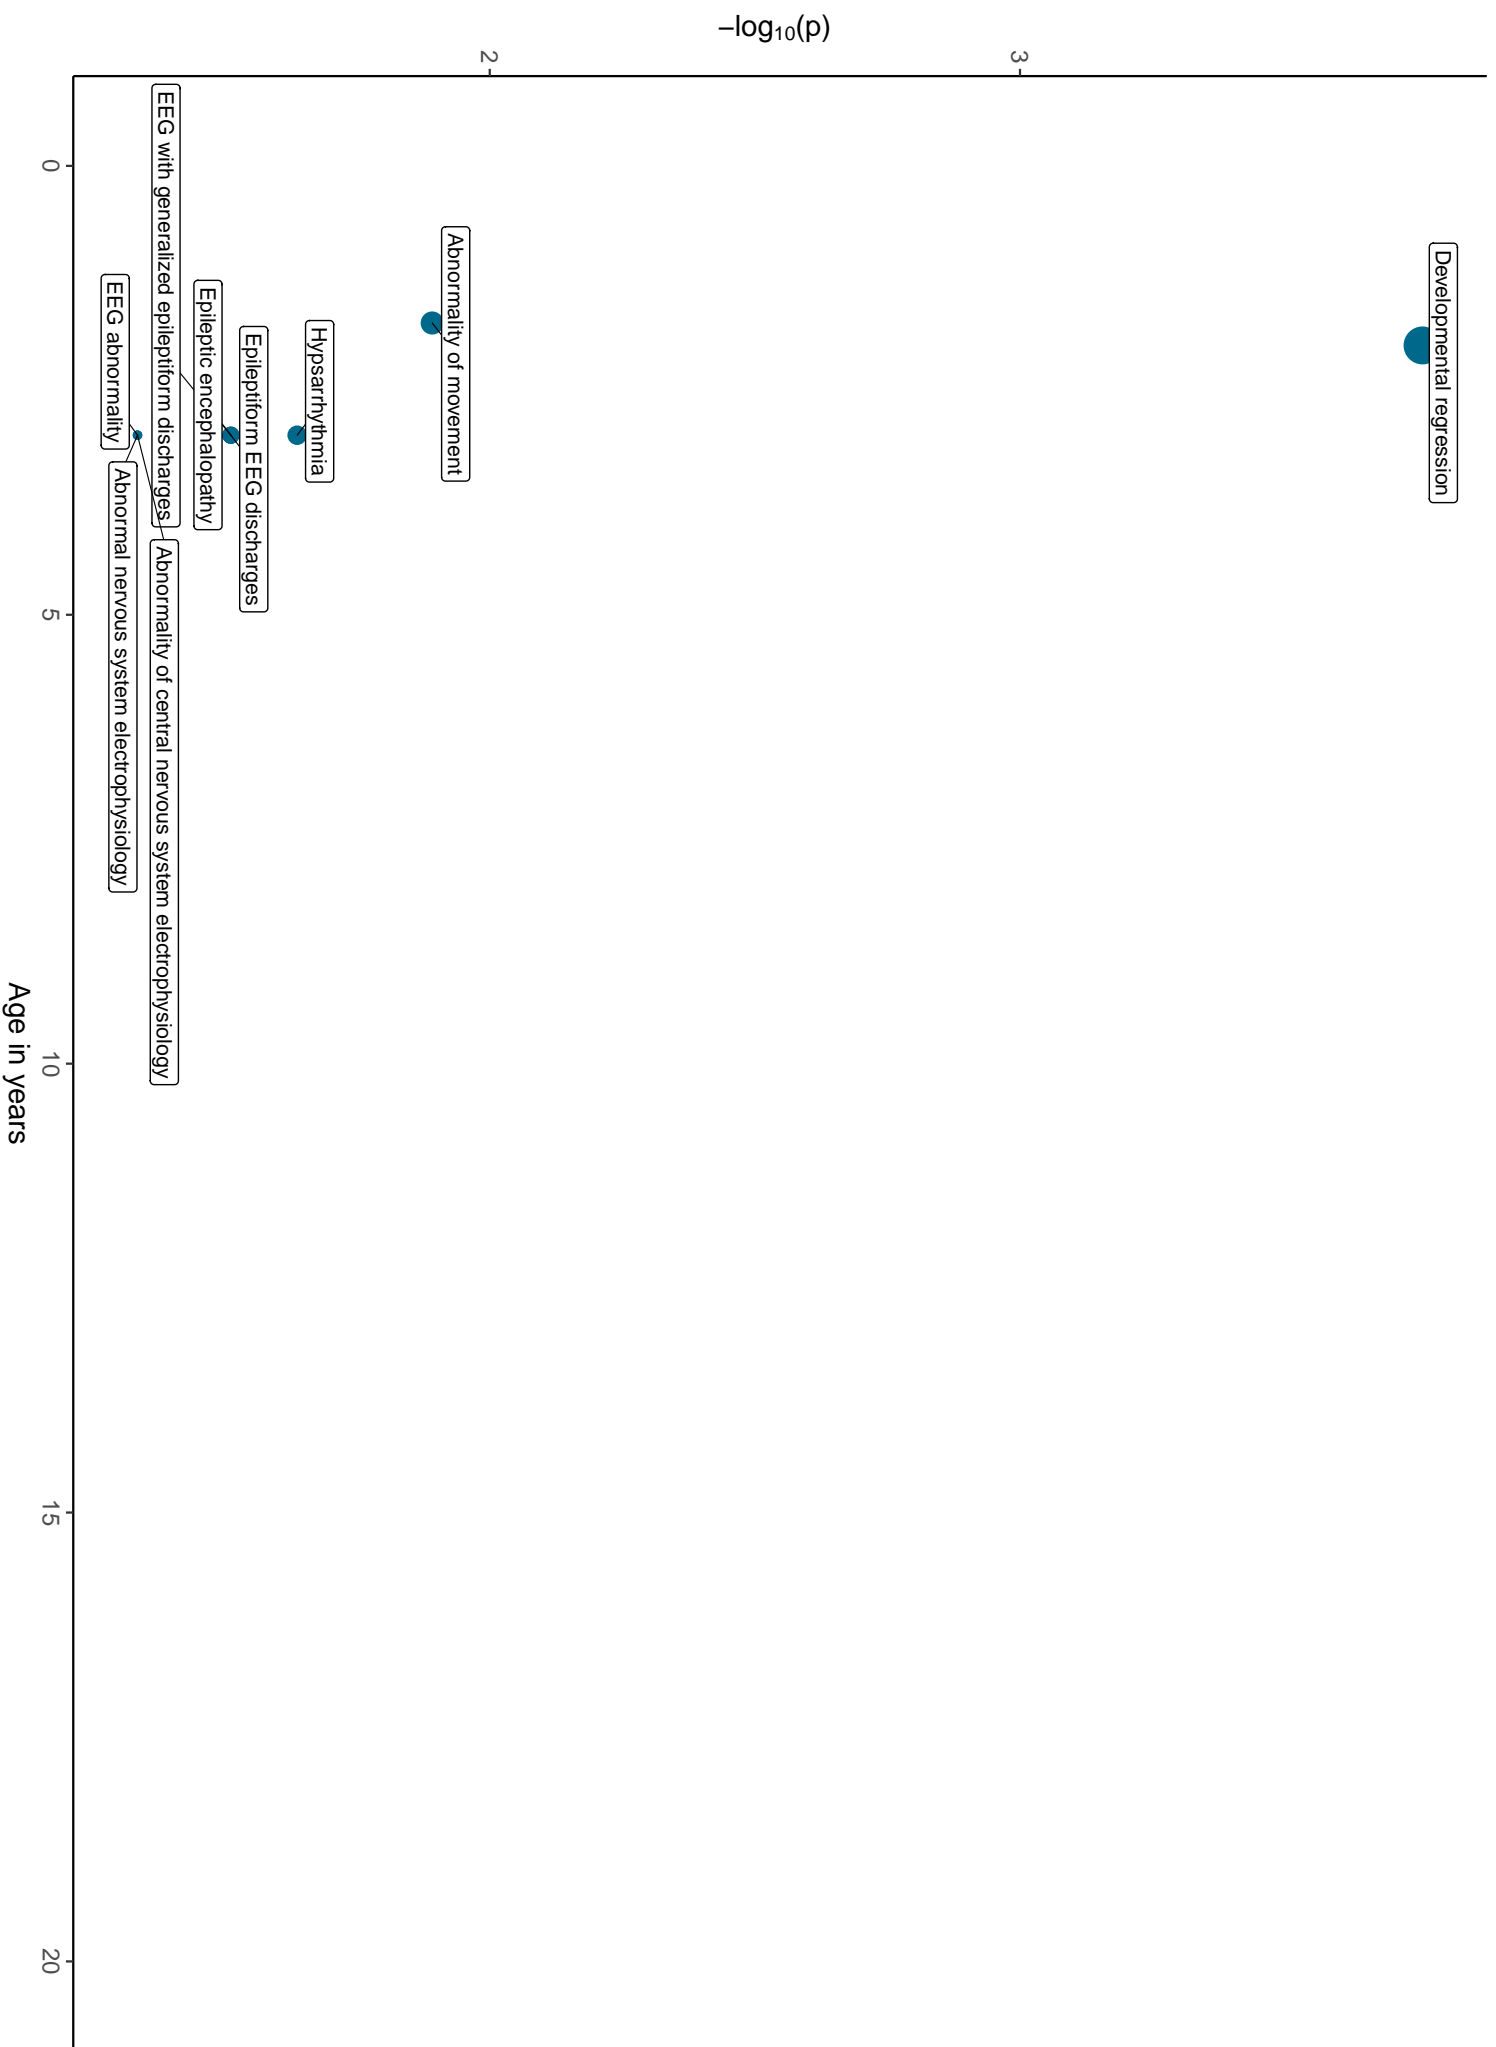

Developmental regression

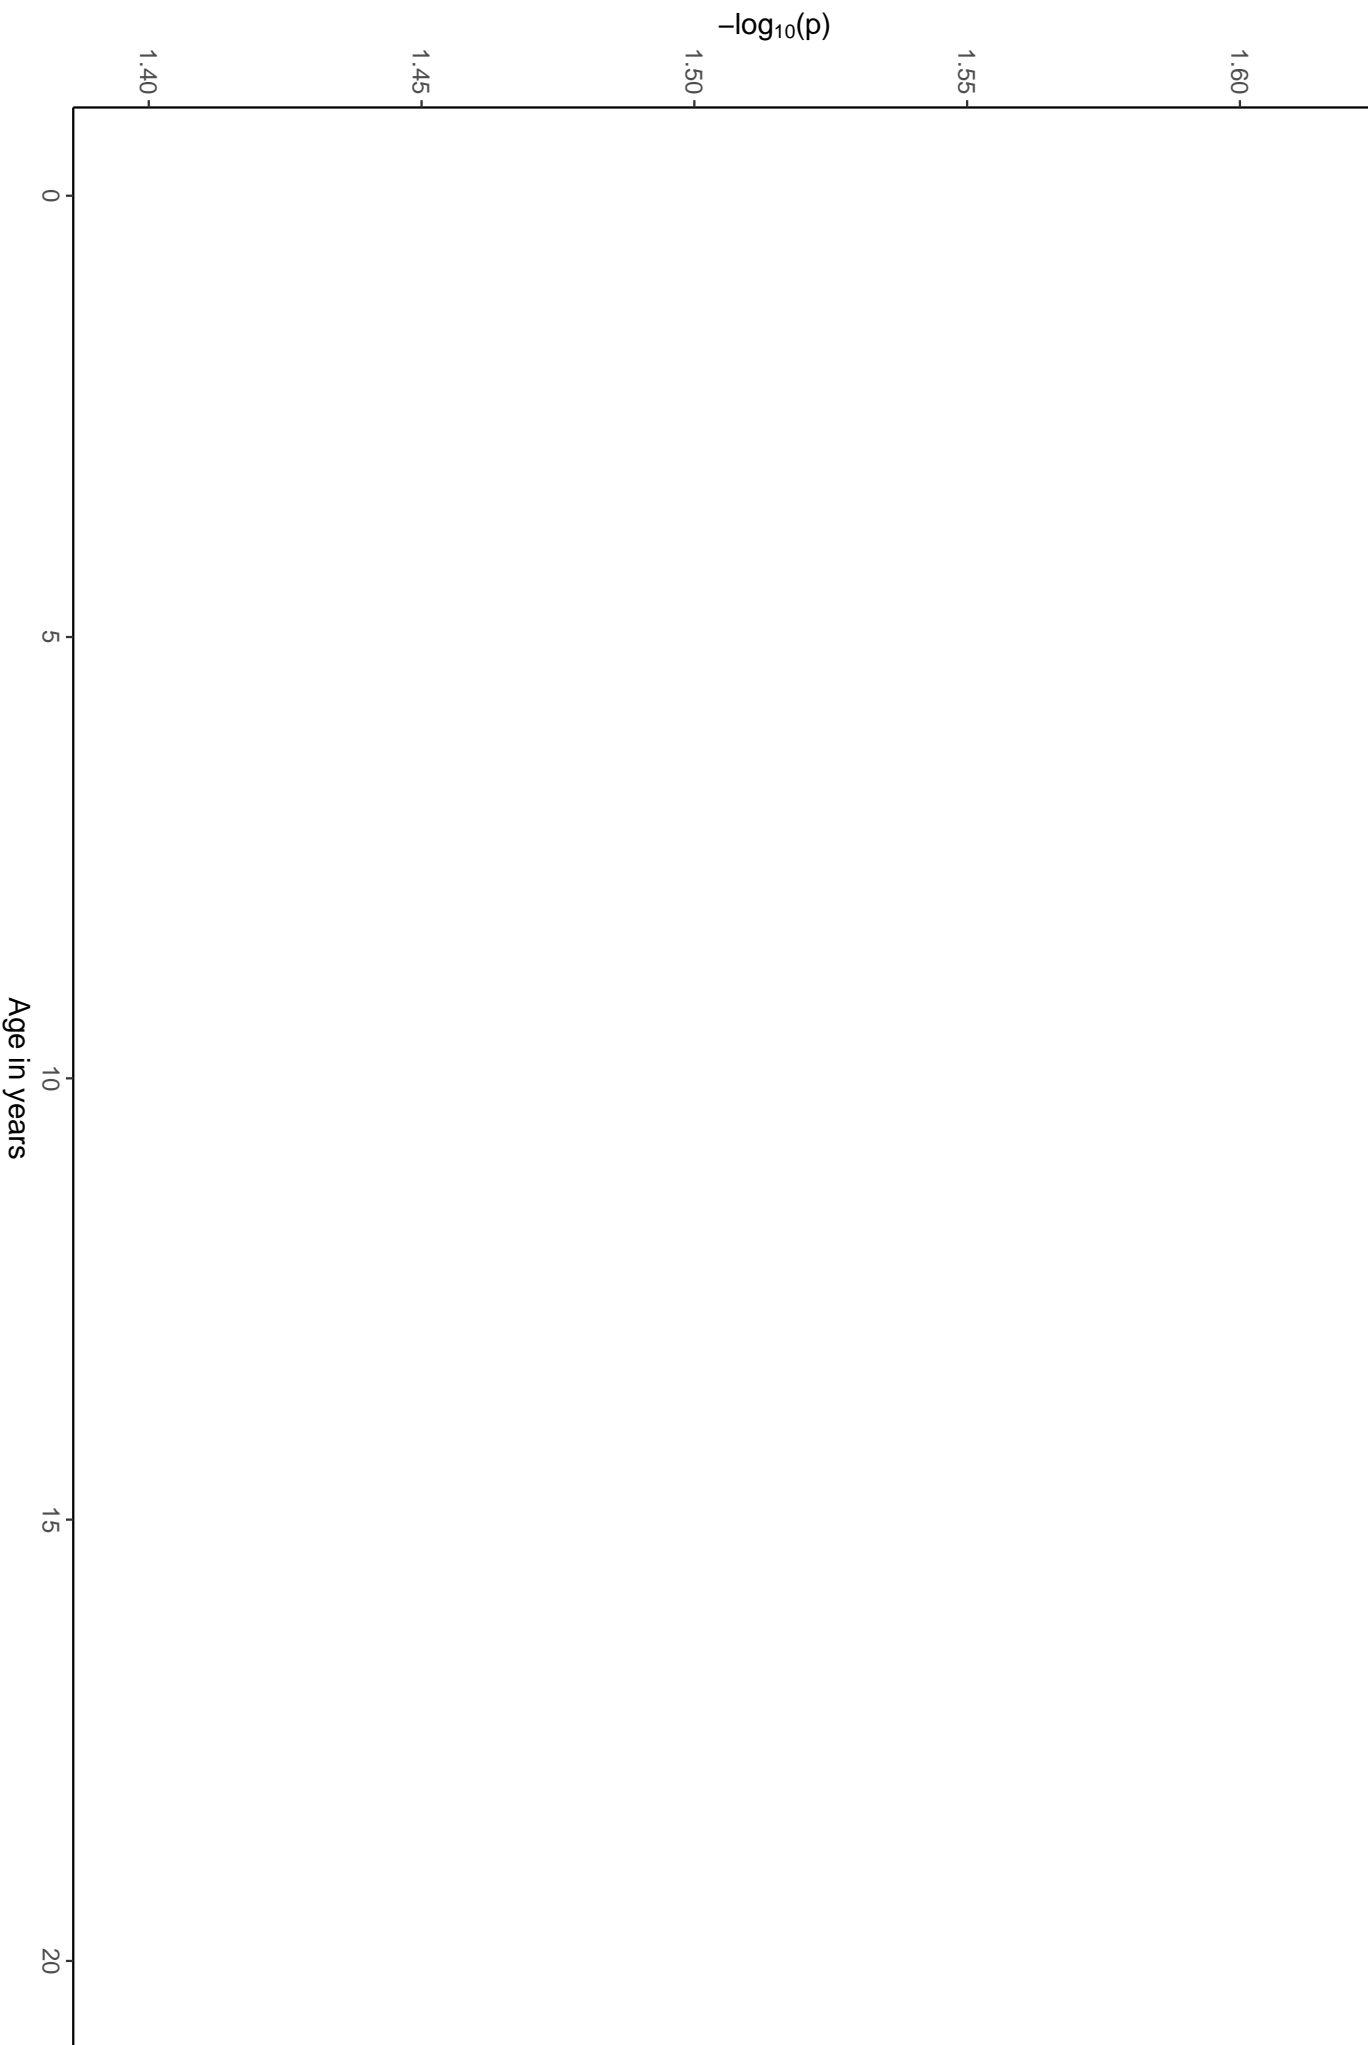

HPO terms associated with GABRB3

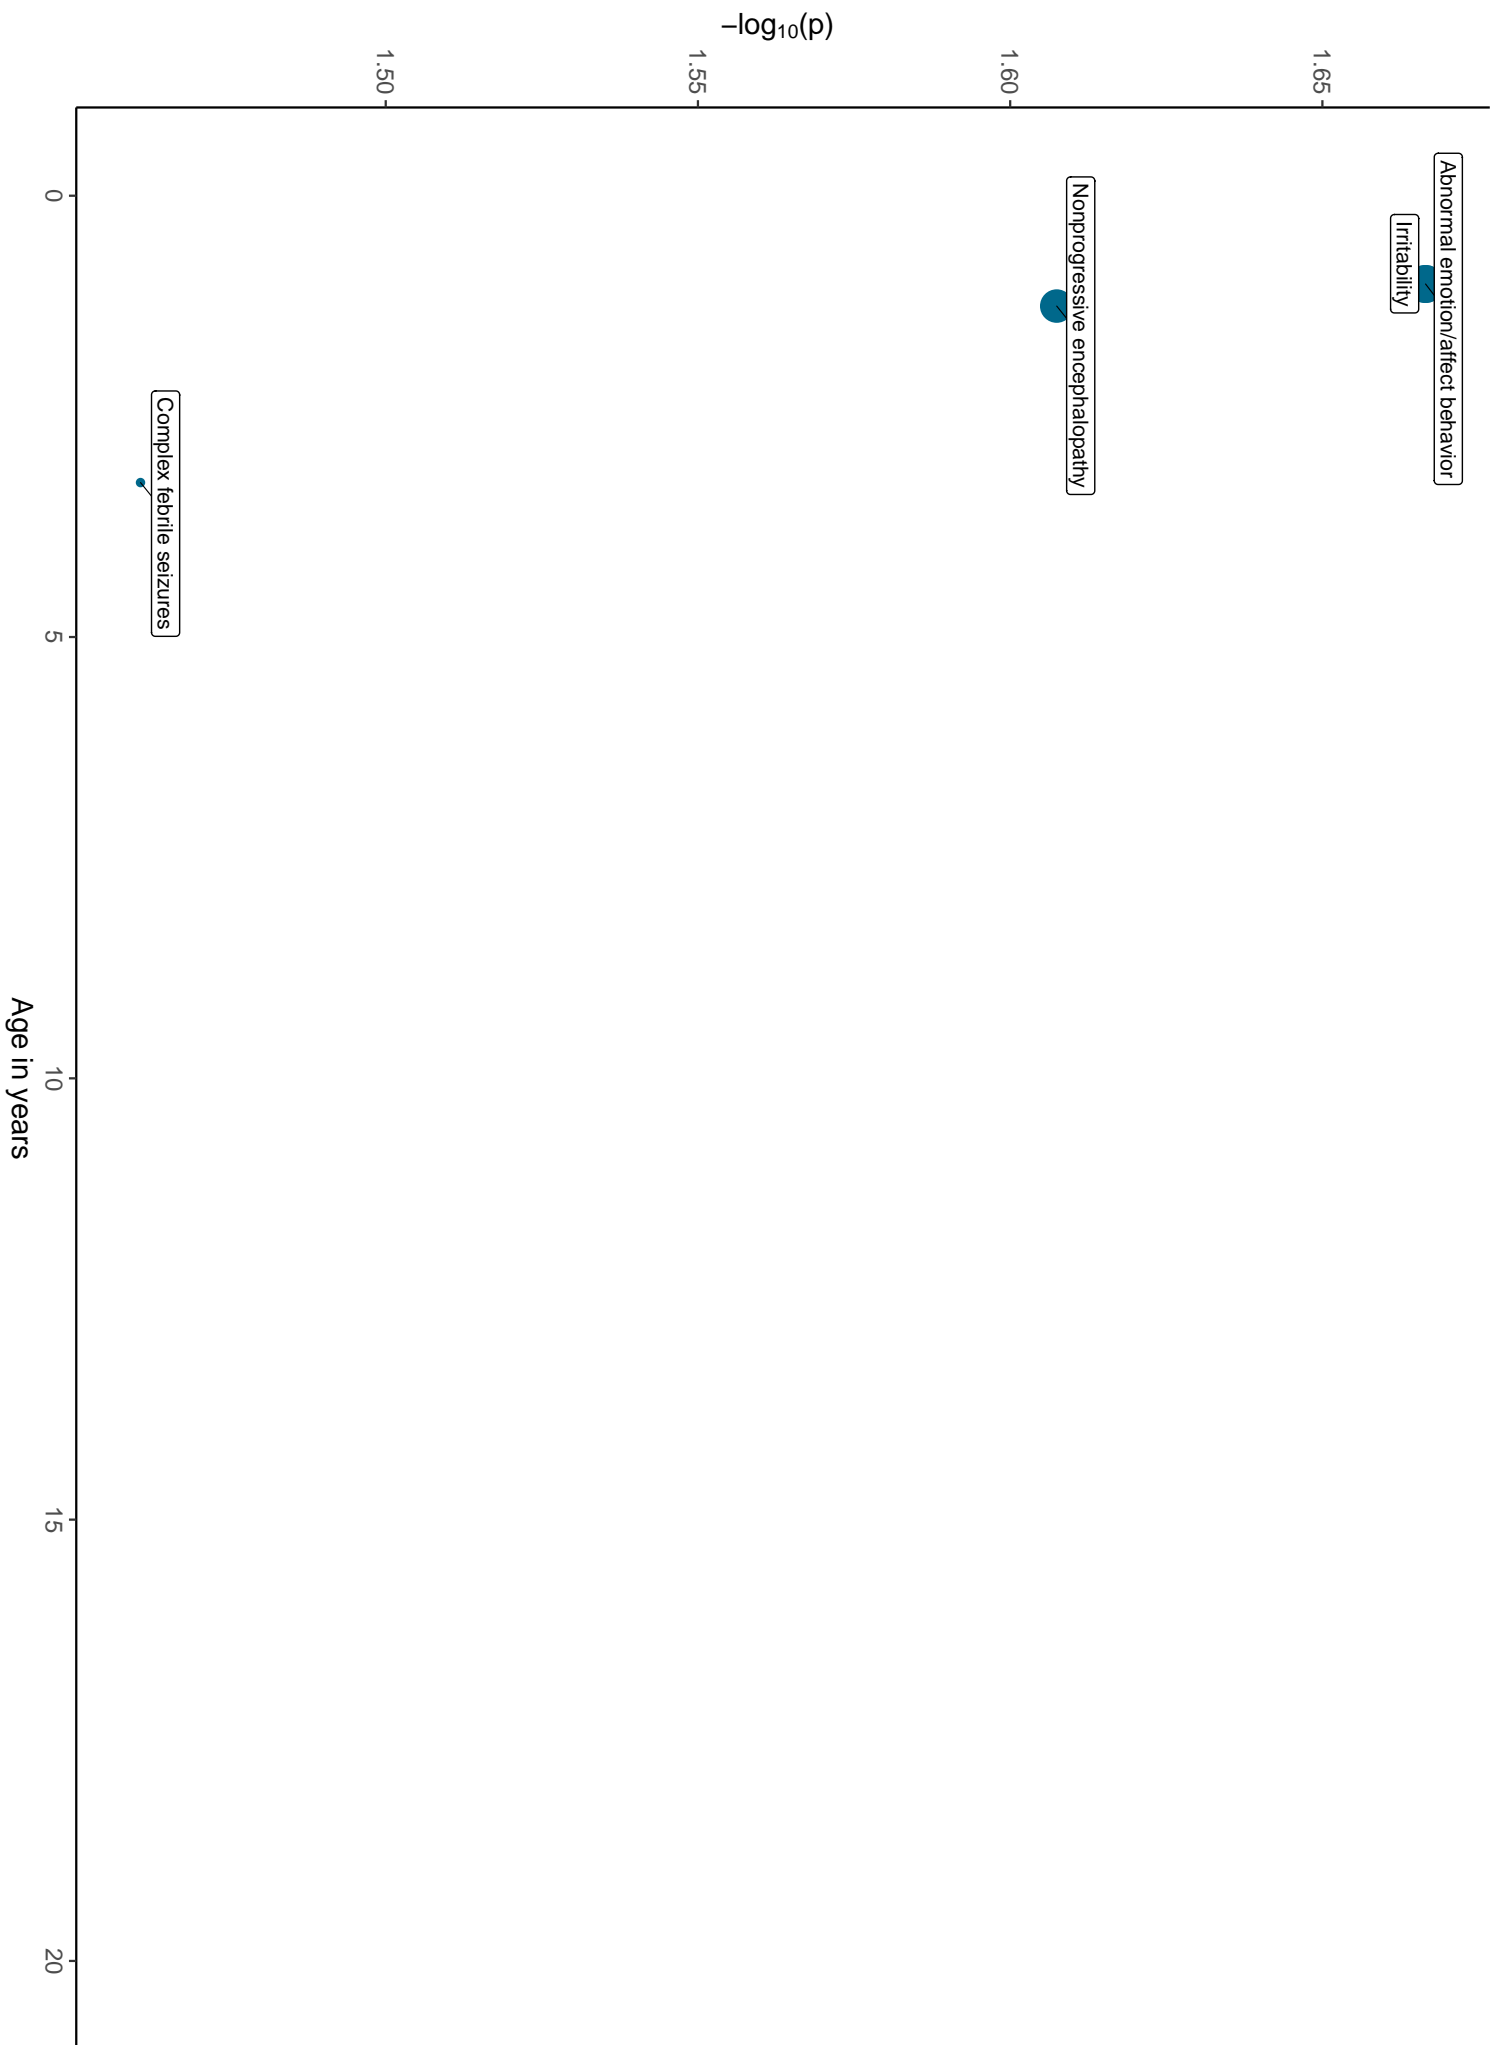

HPO terms associated with GNB1

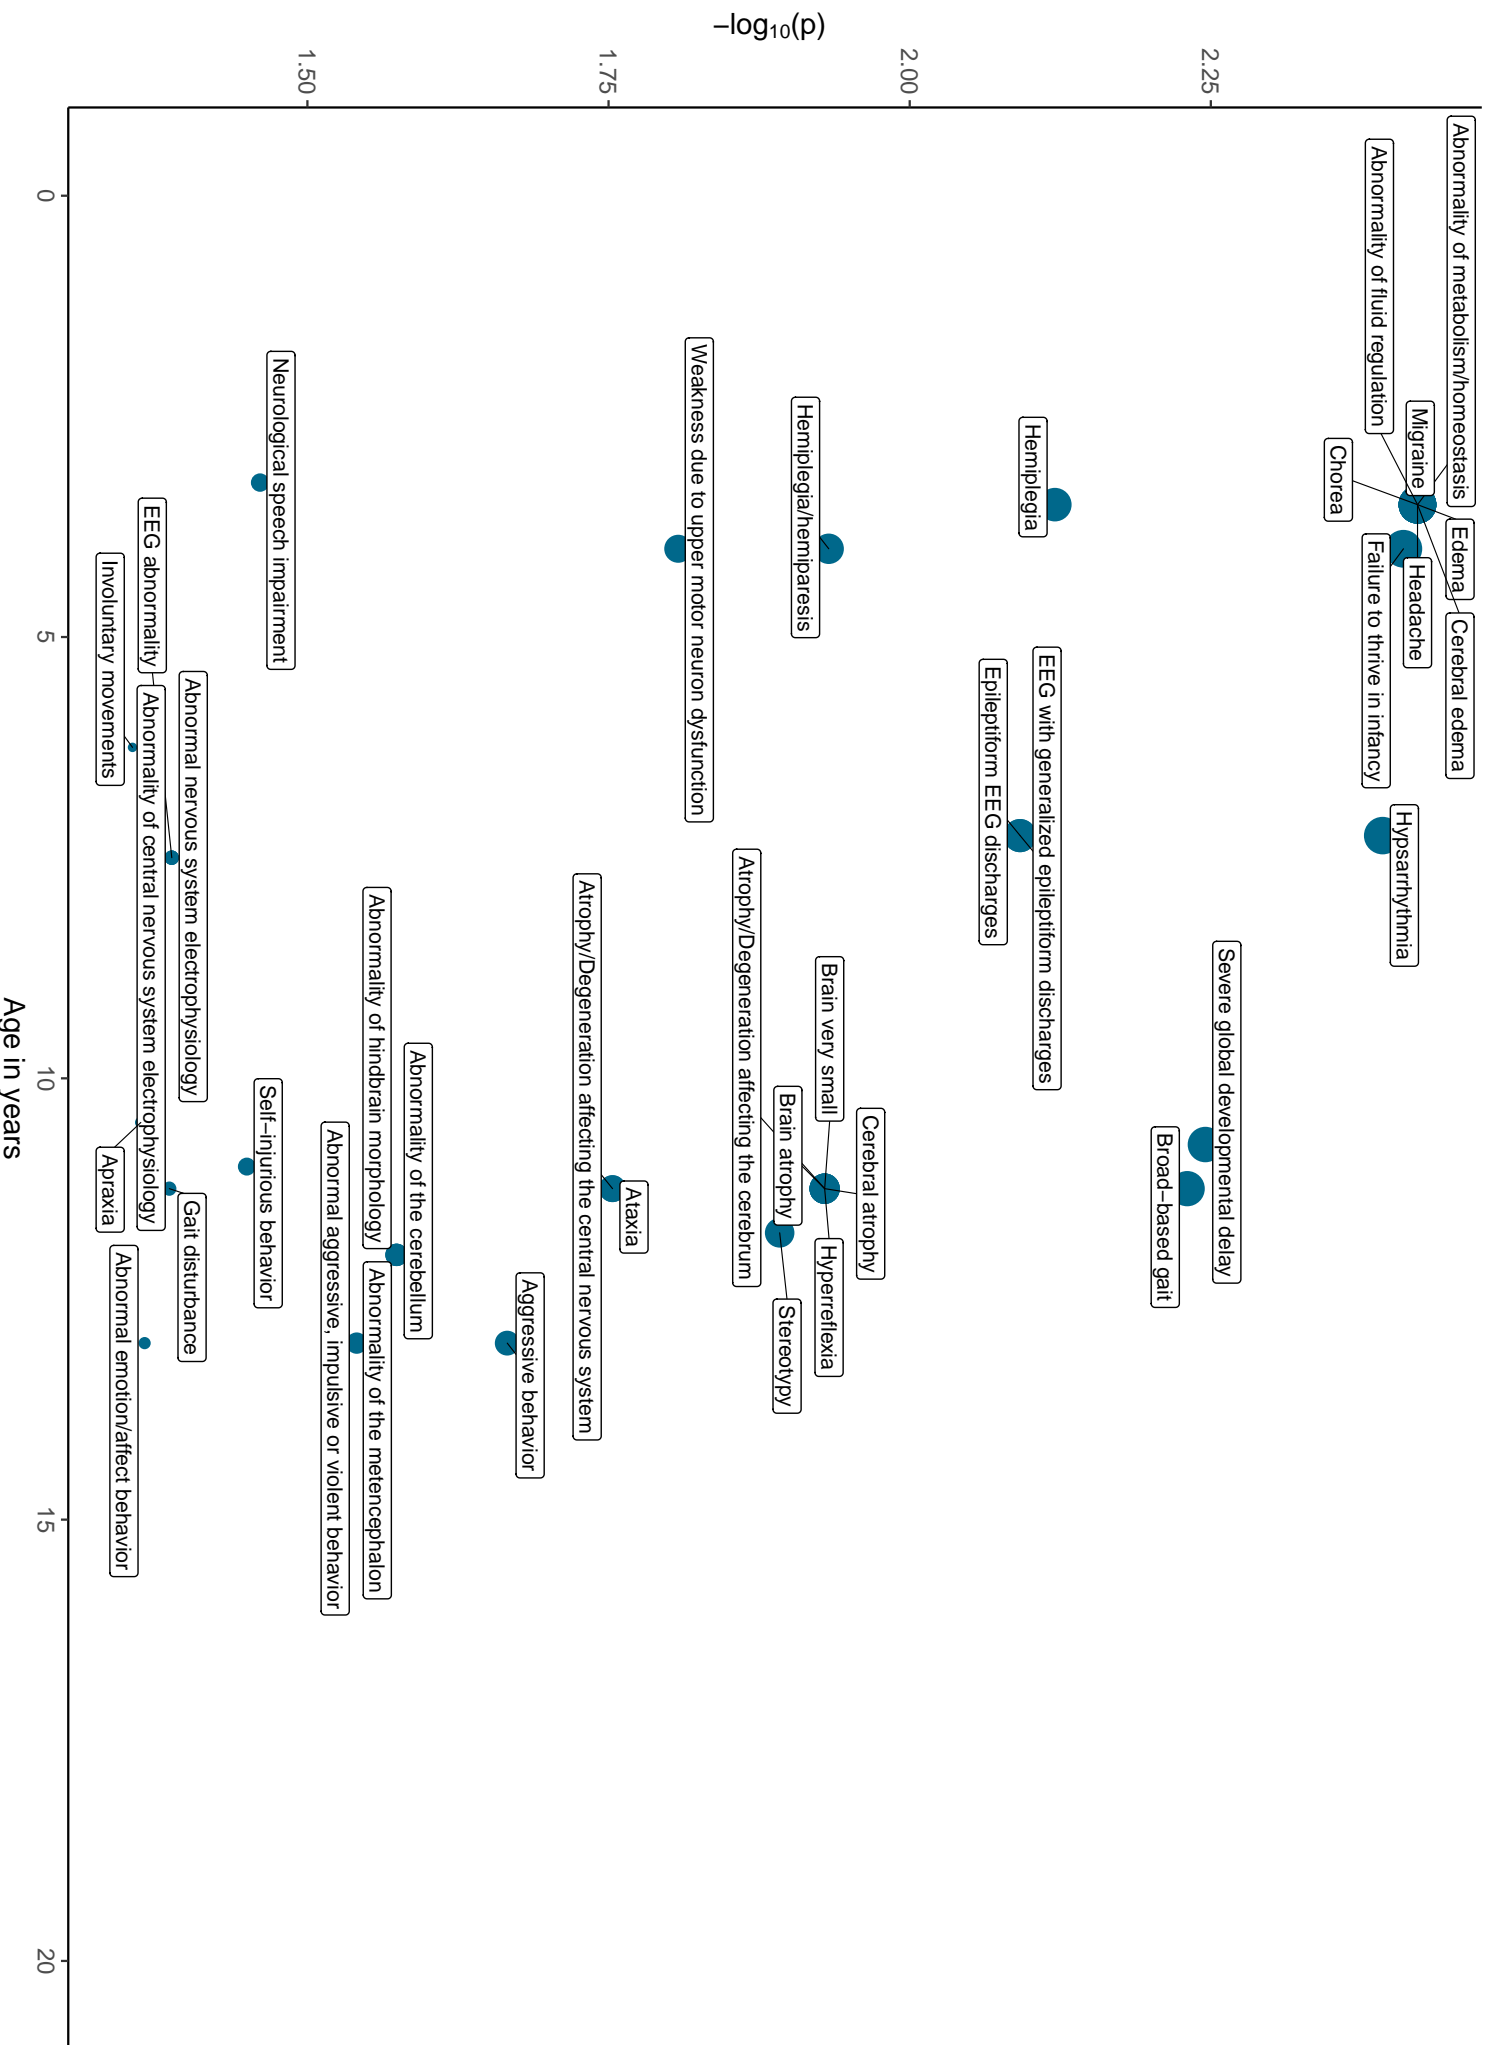

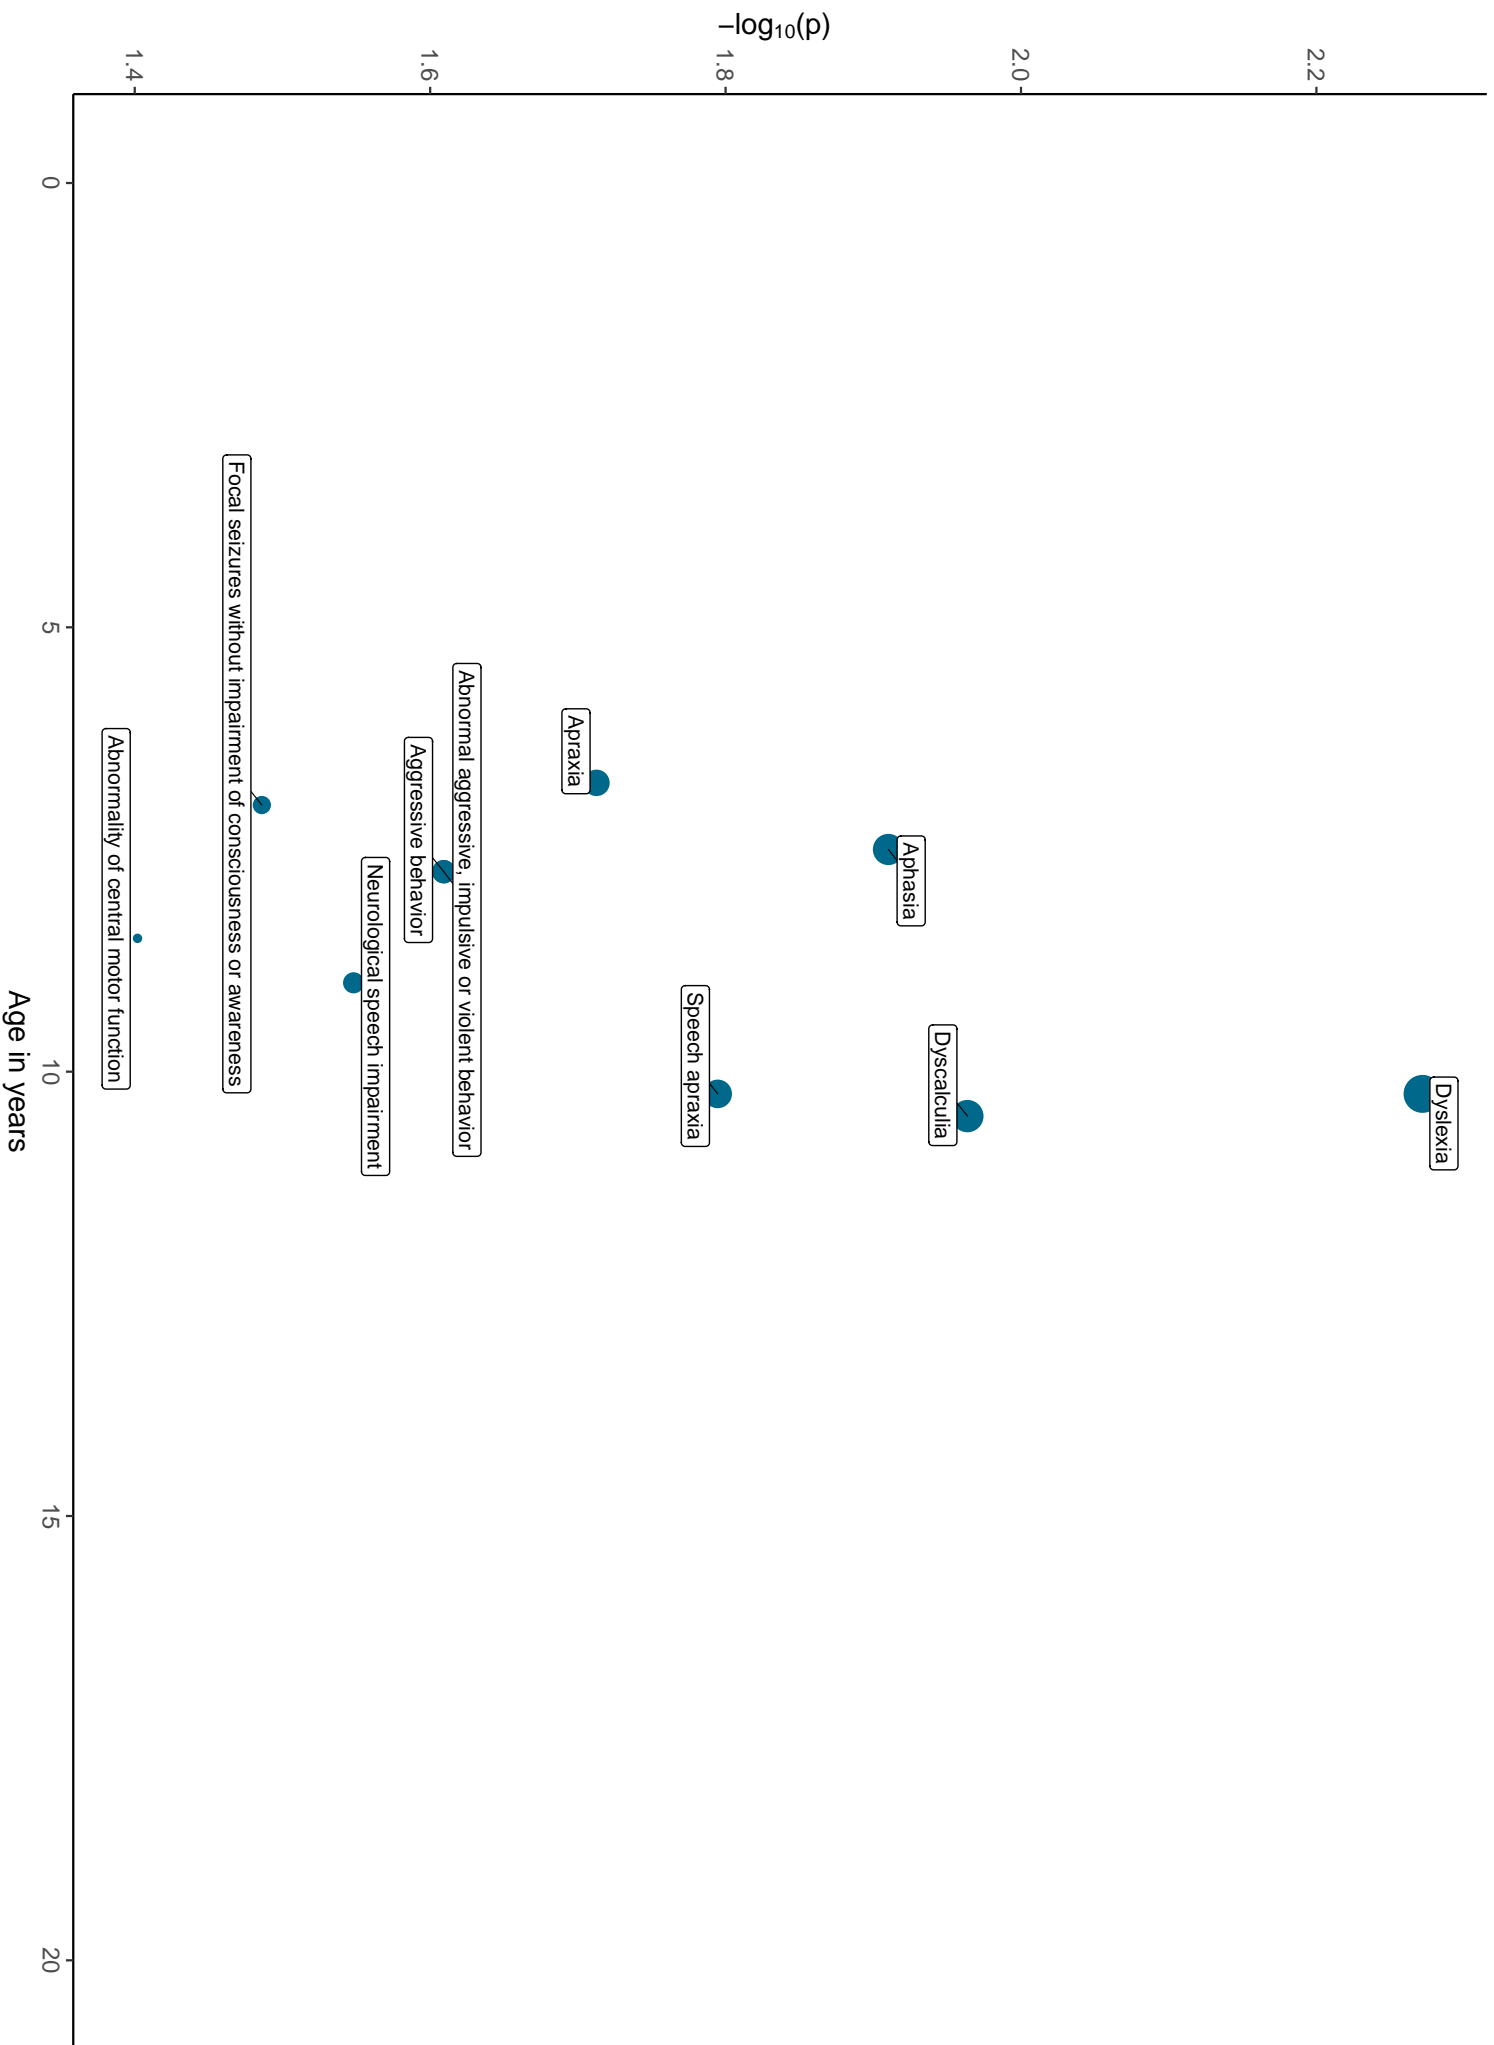

HPO terms associated with GRIN2B

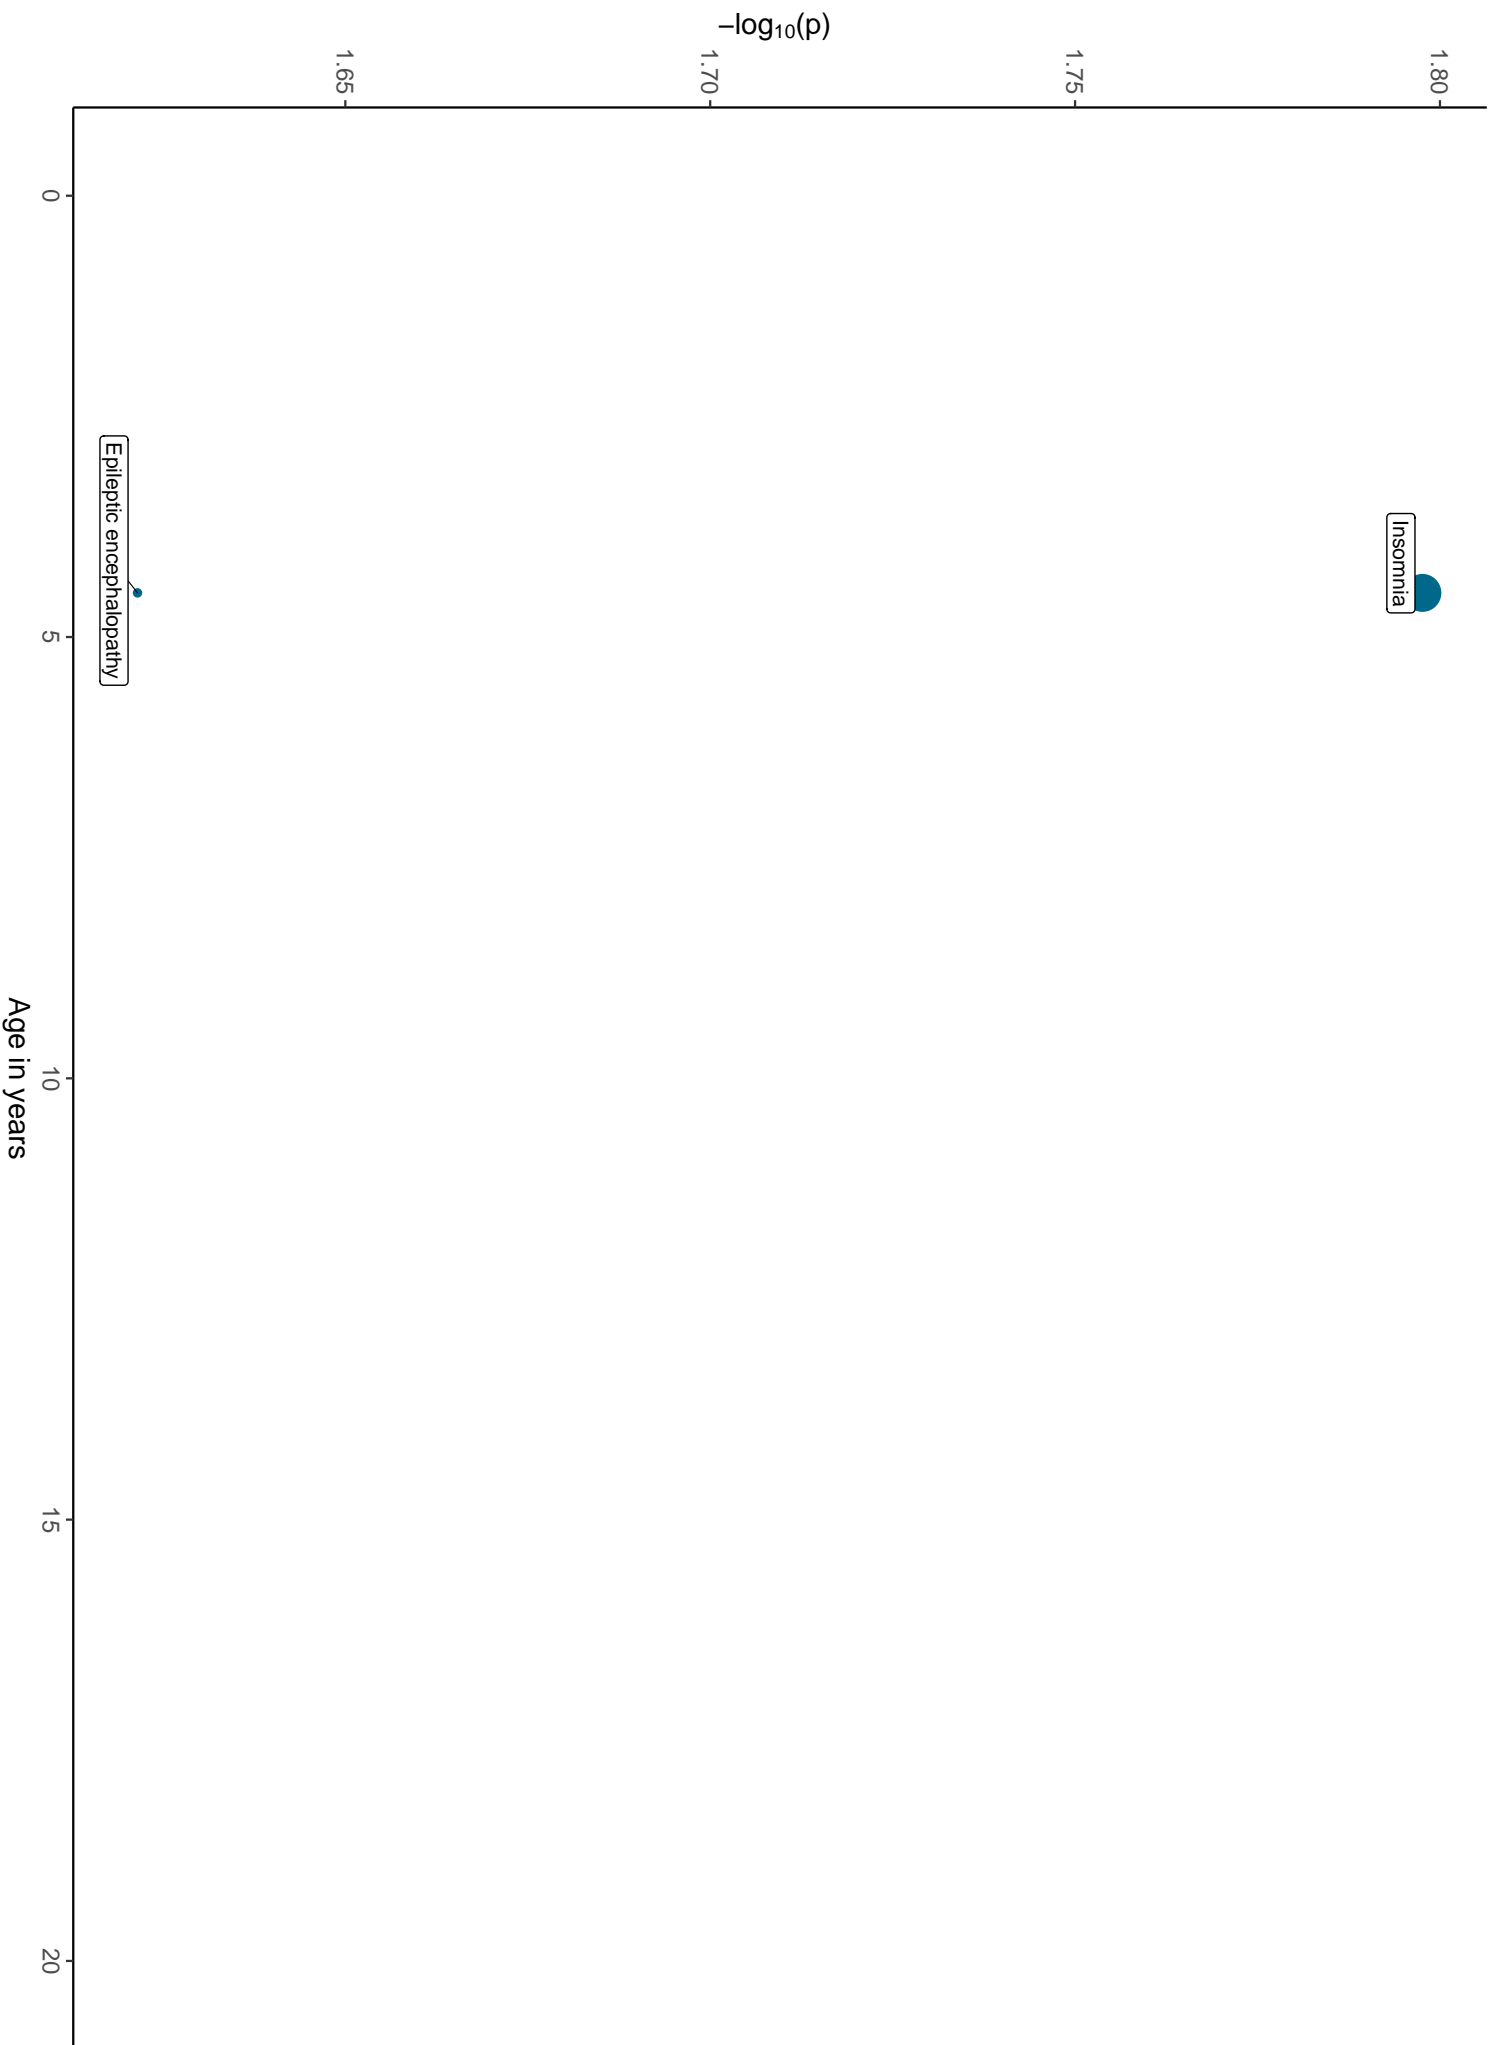

HPO terms associated with KIF1A

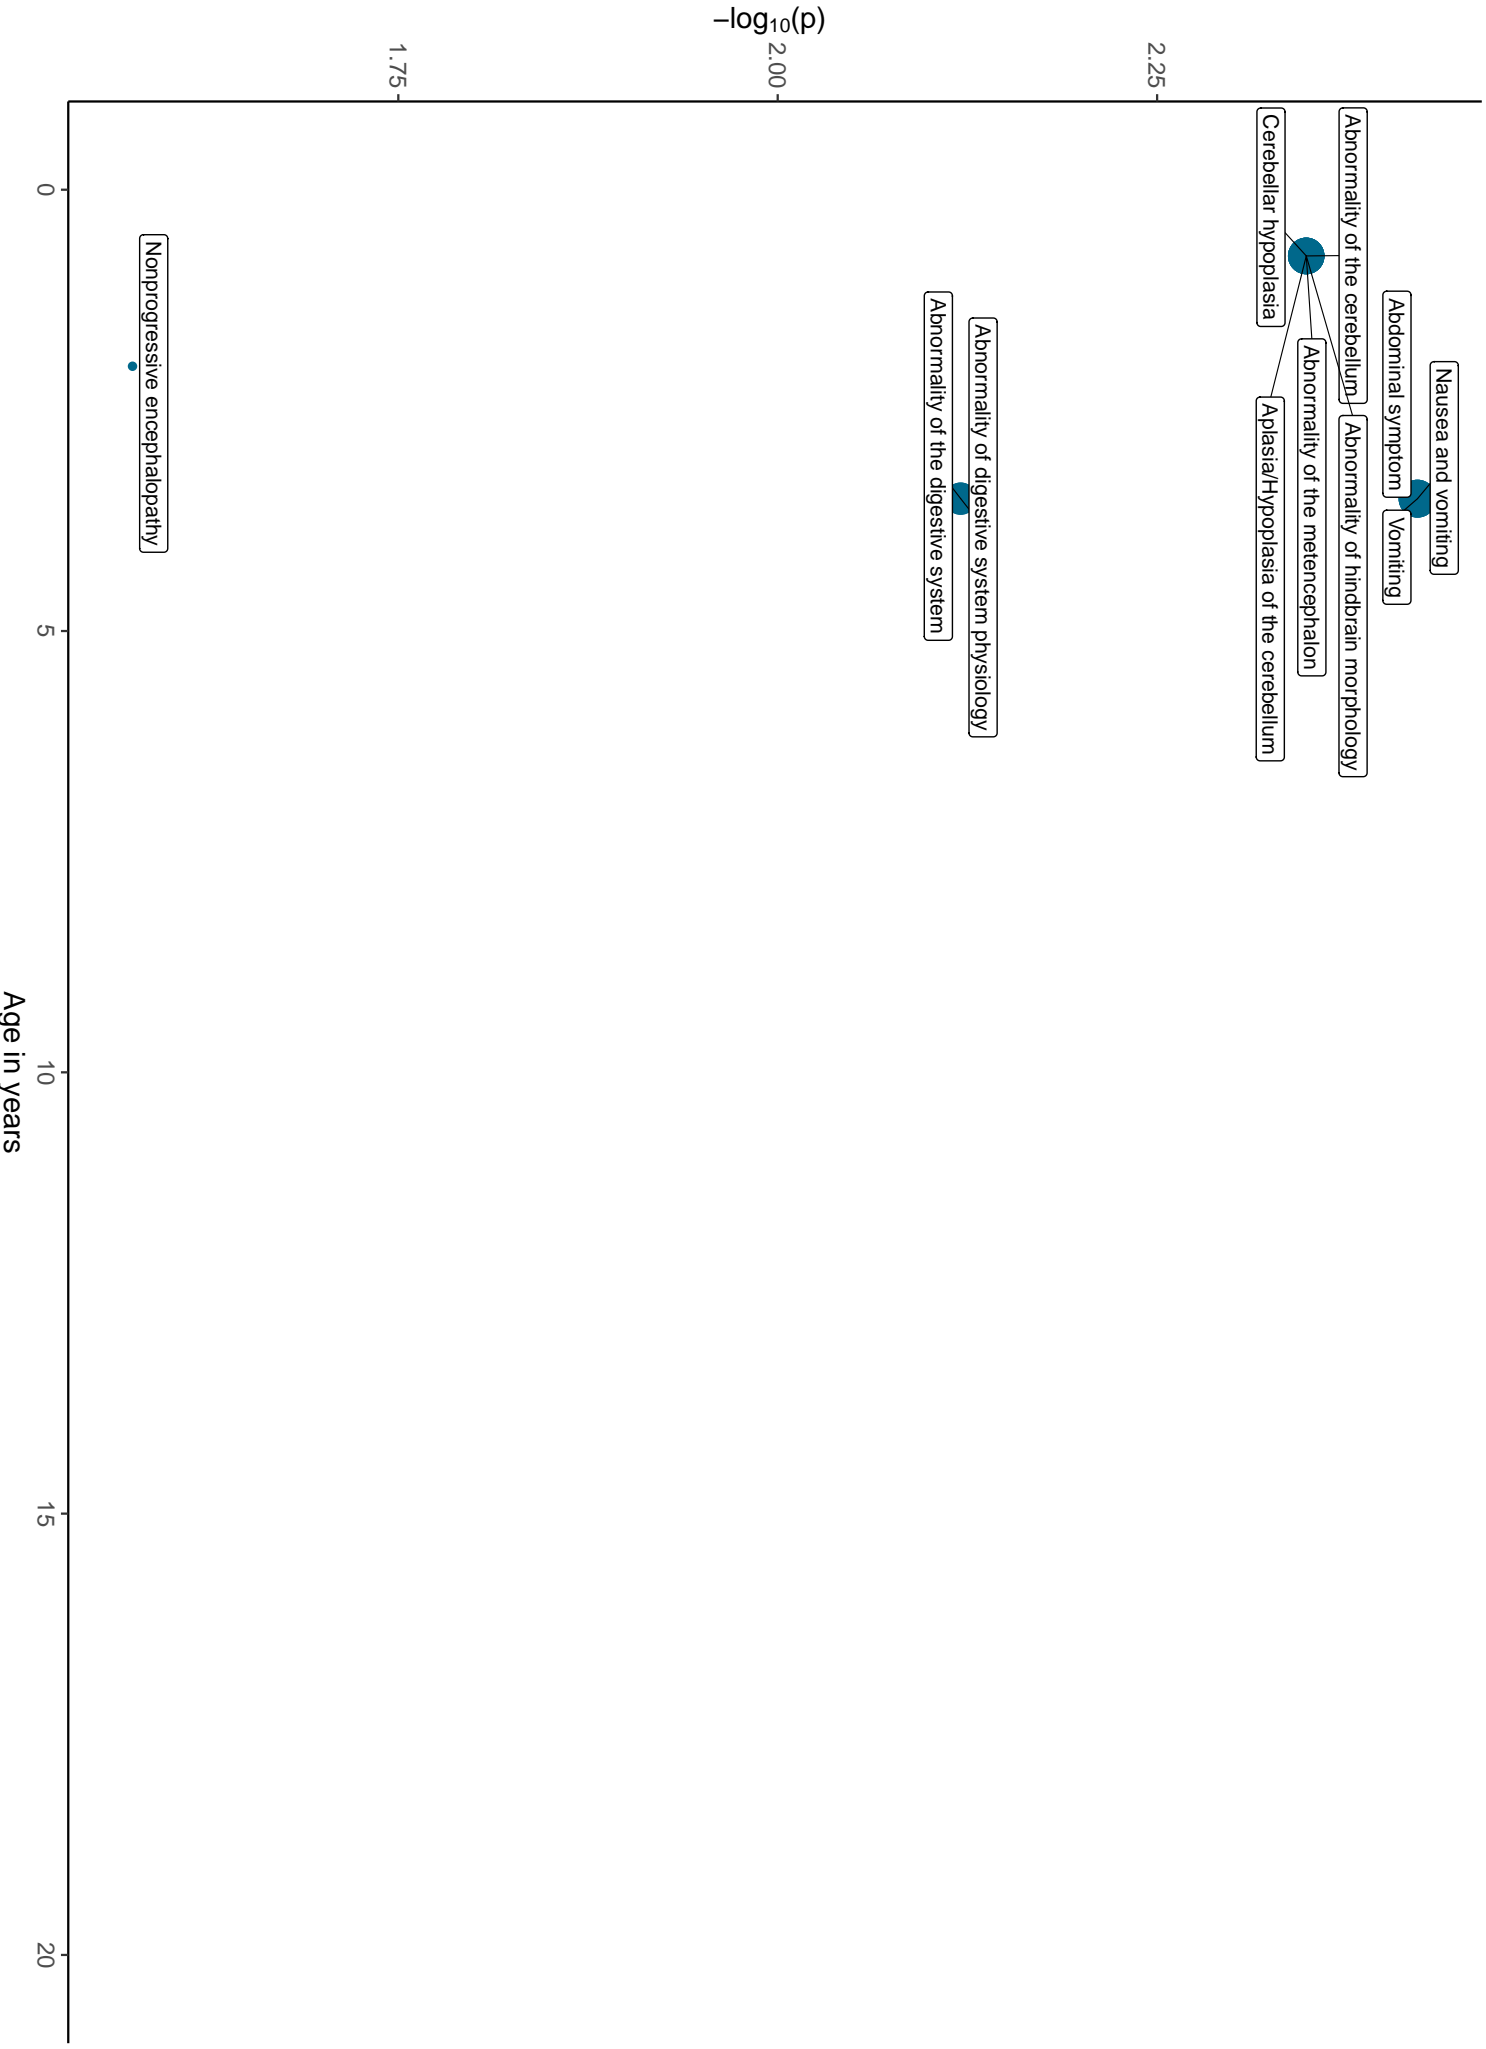

HPO terms associated with MECP2

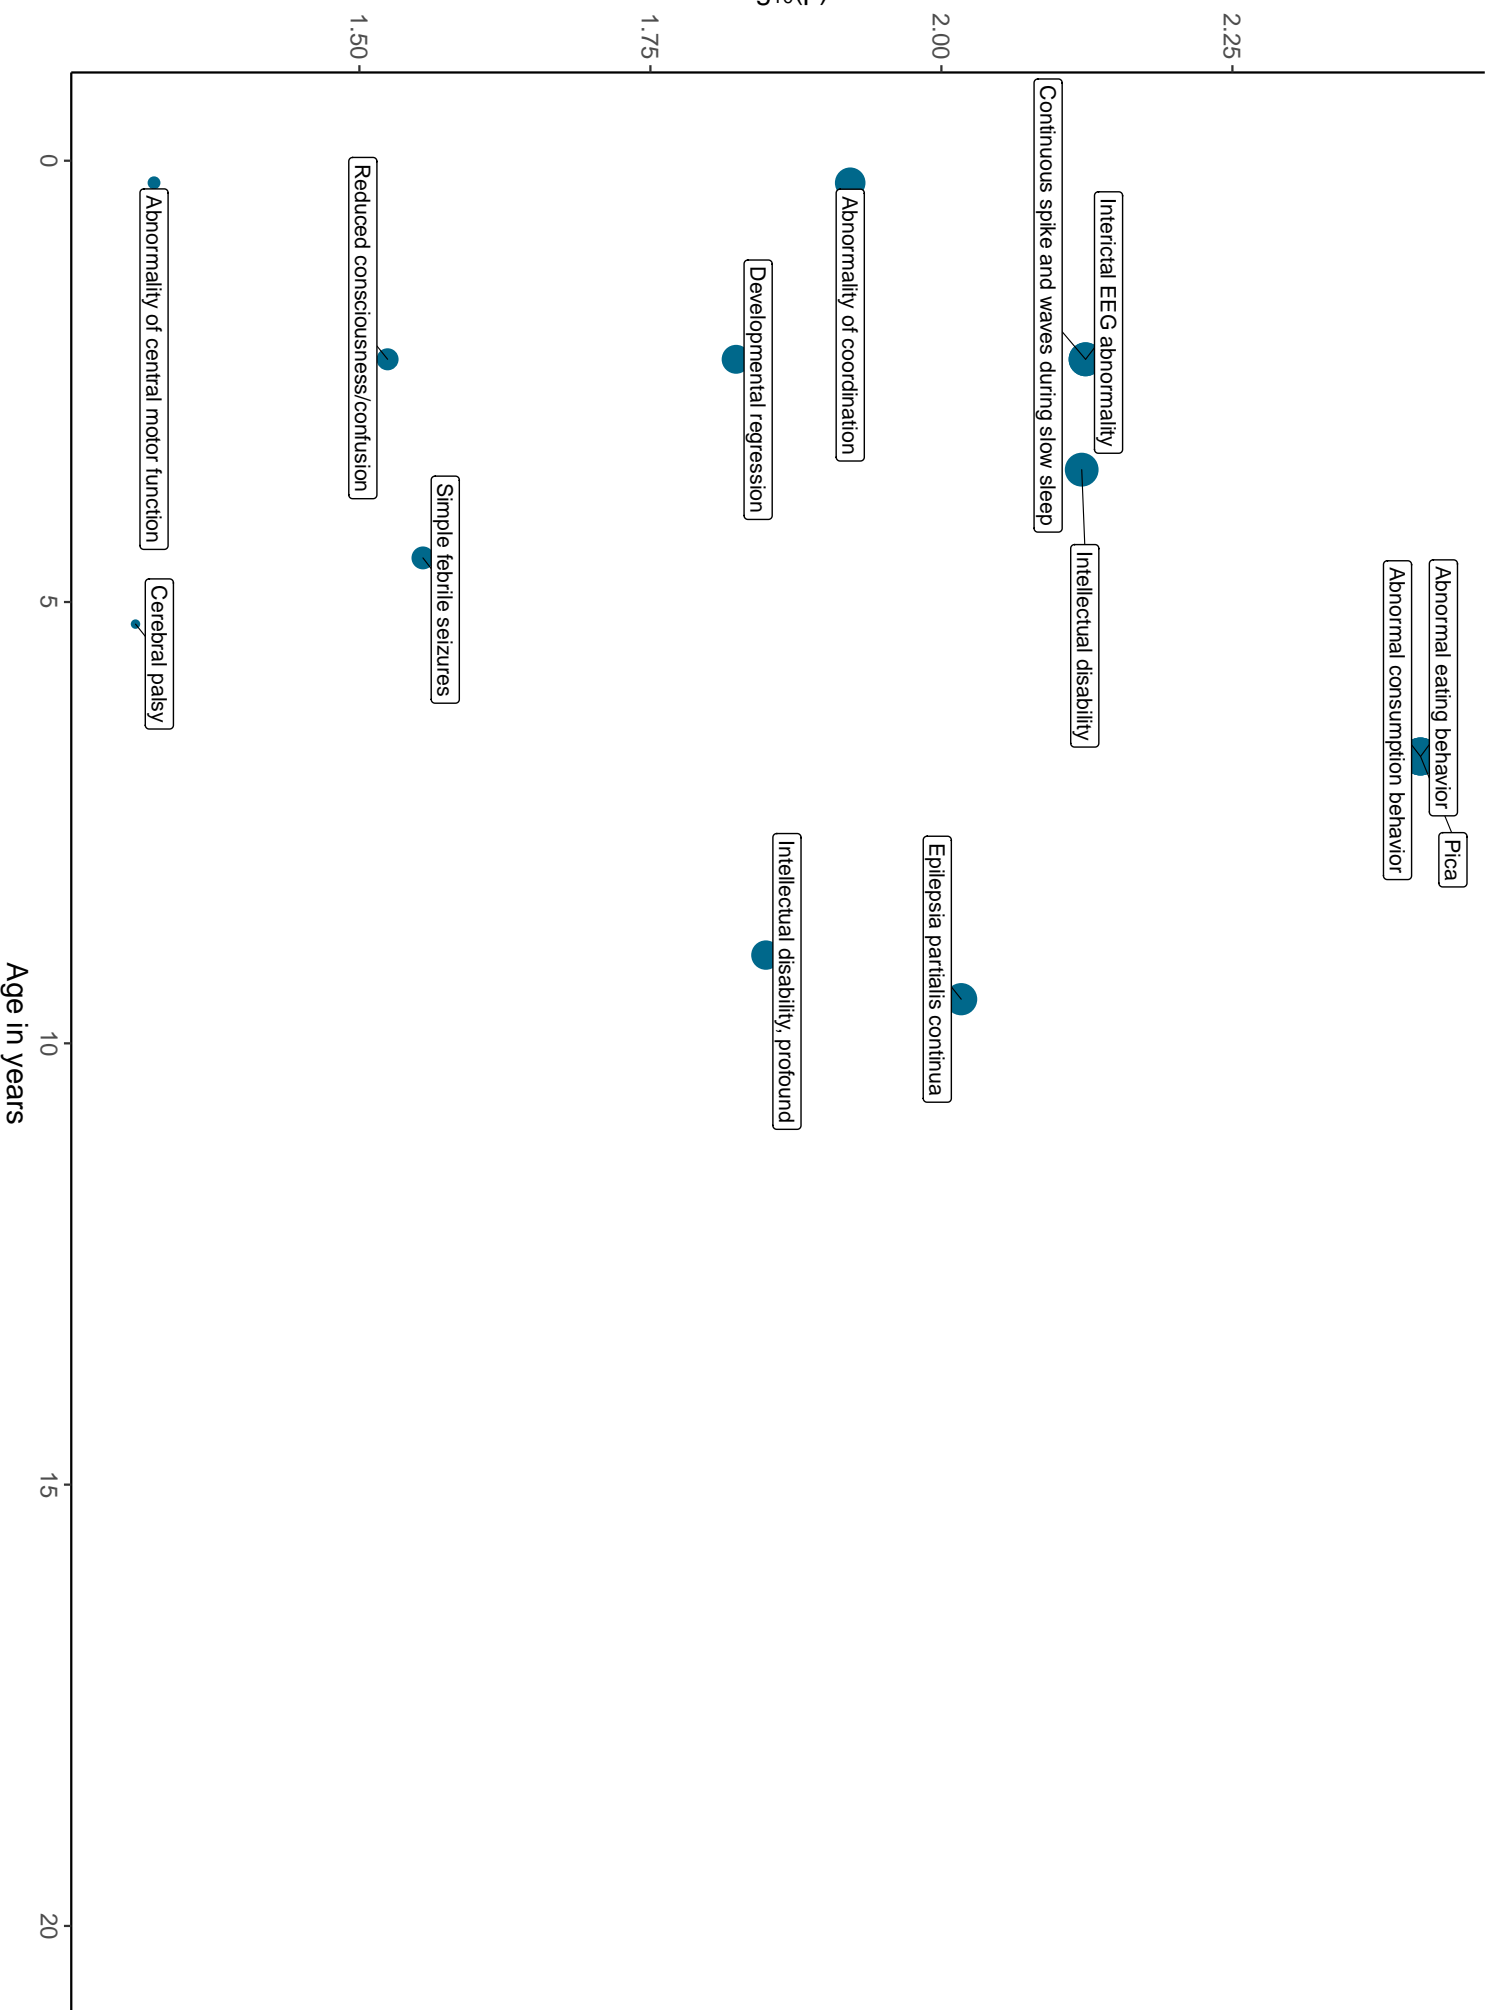



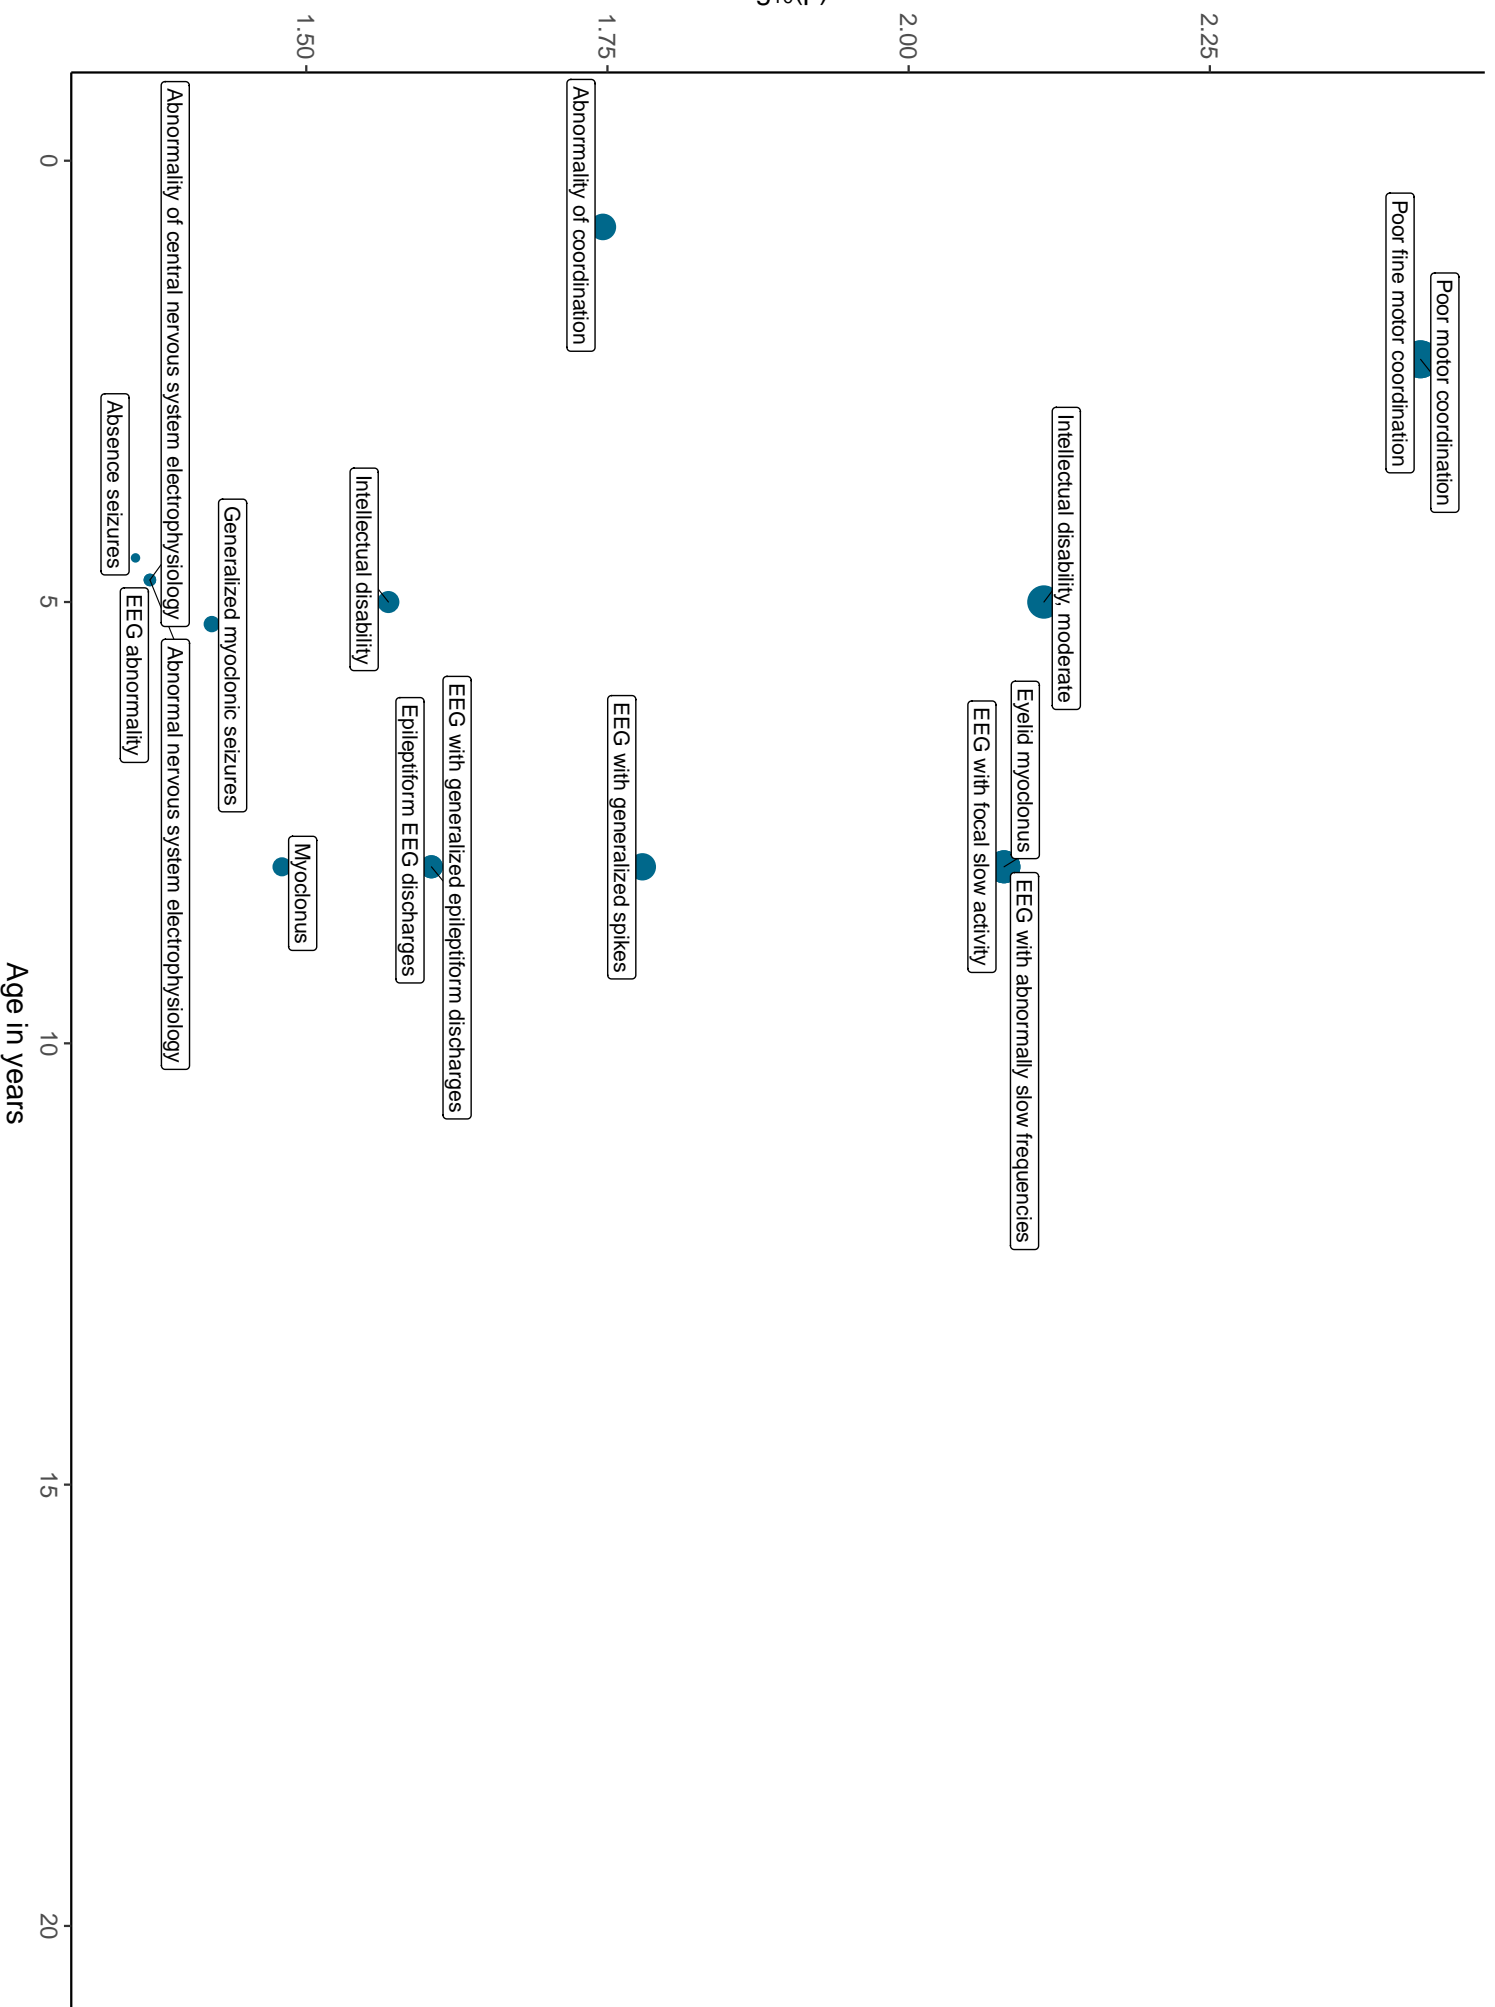

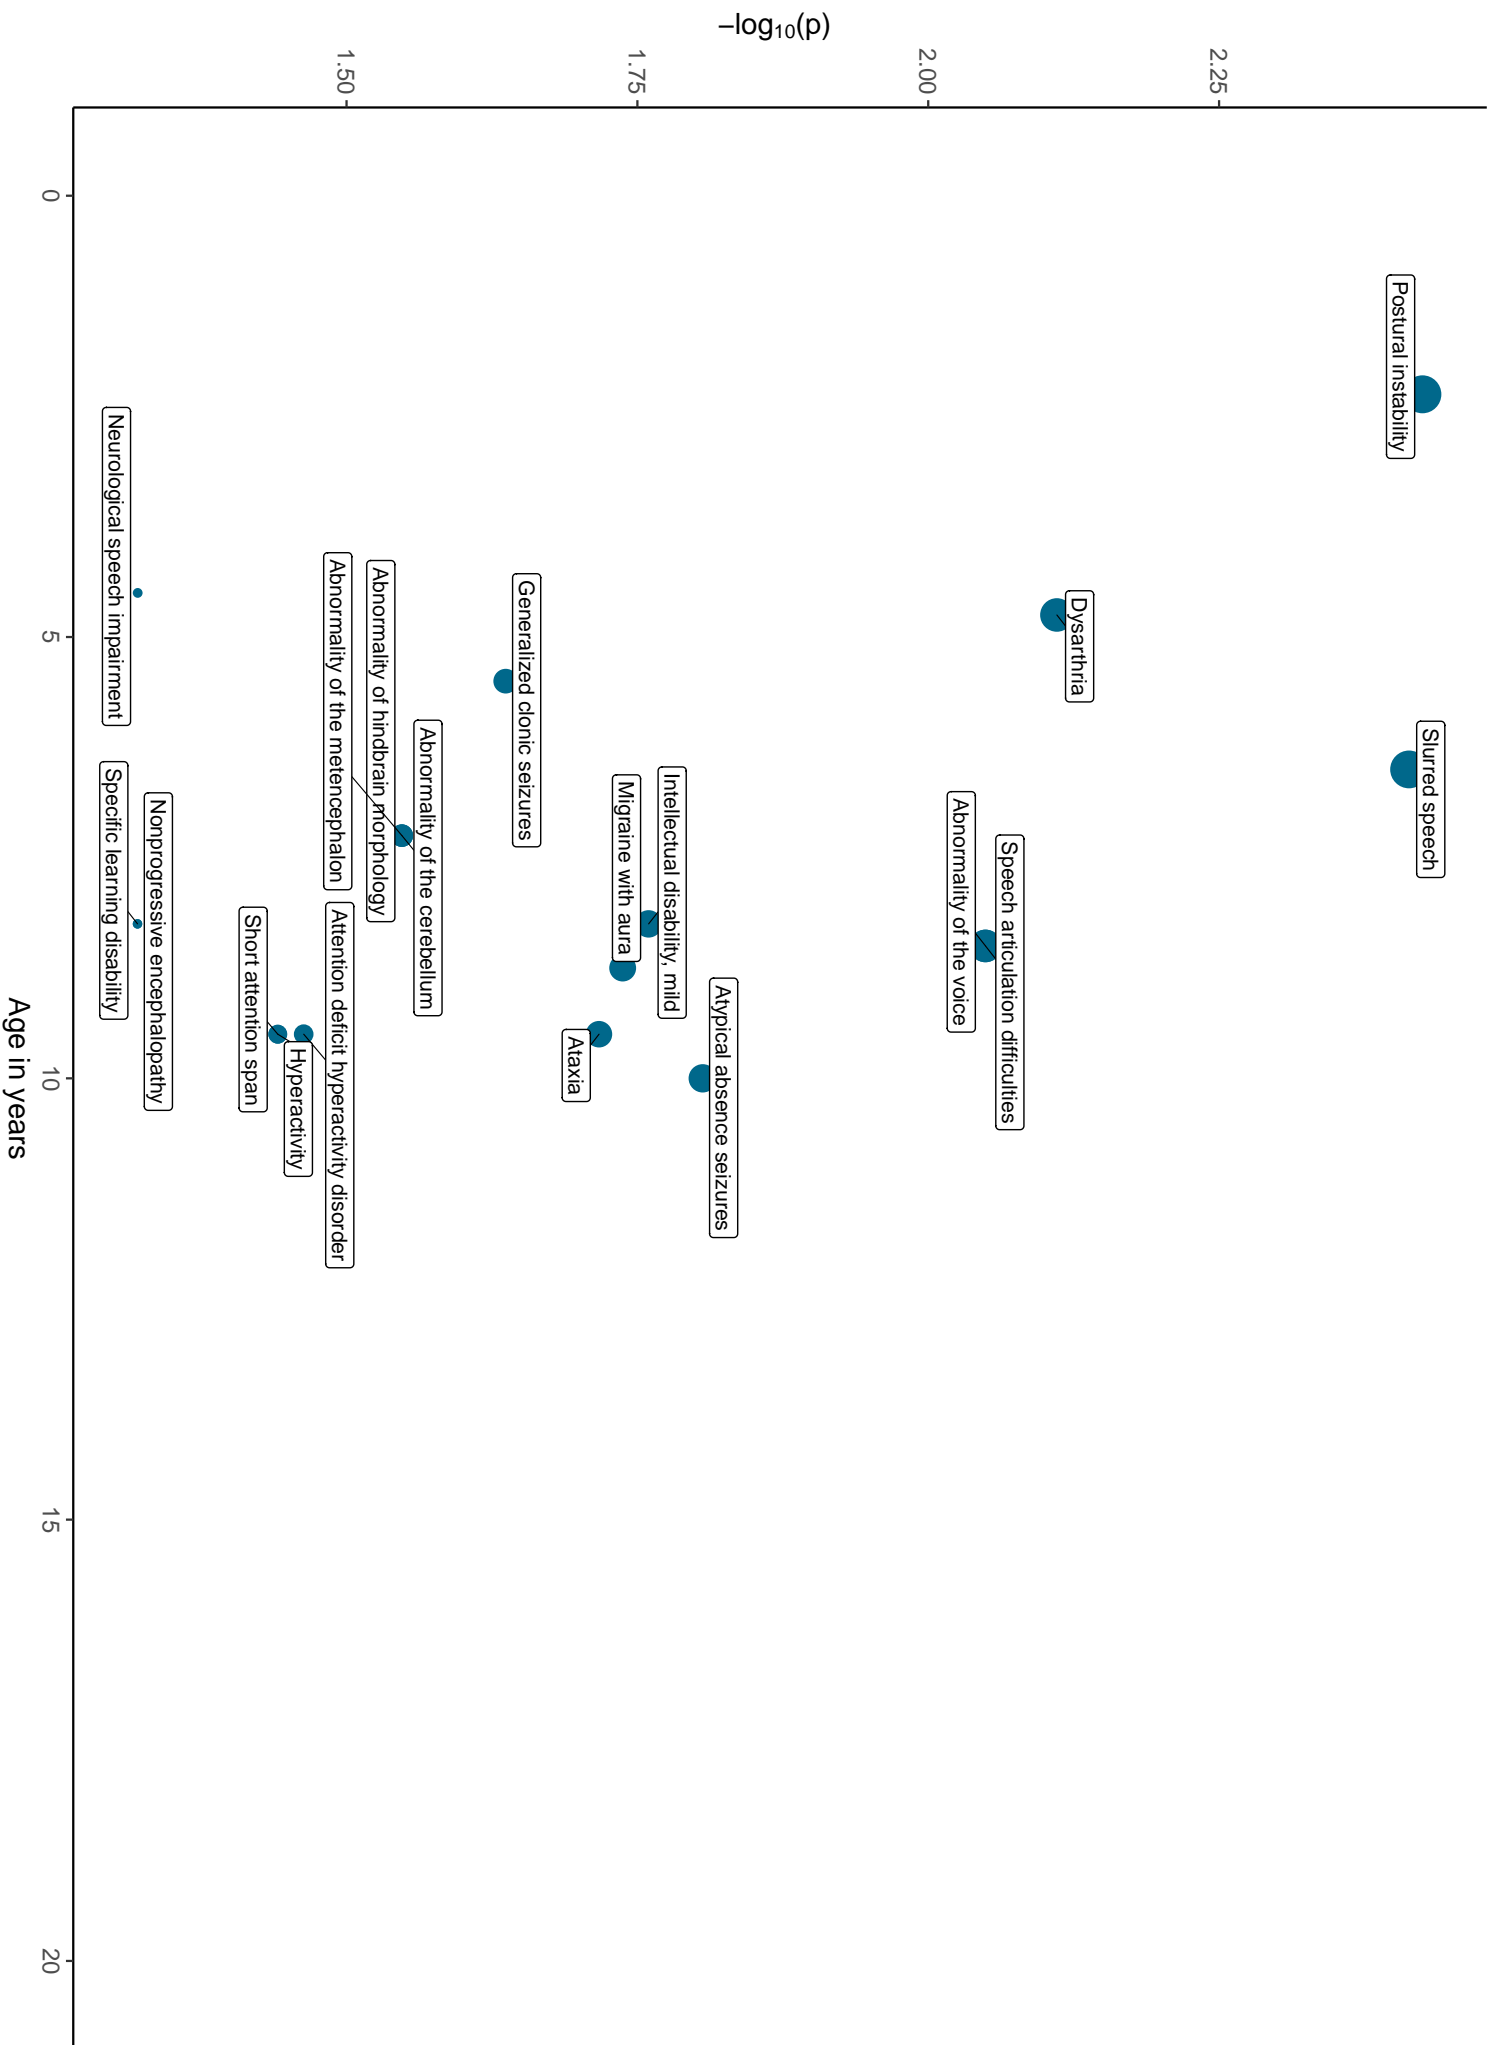

HPO terms associated with SLC6A5

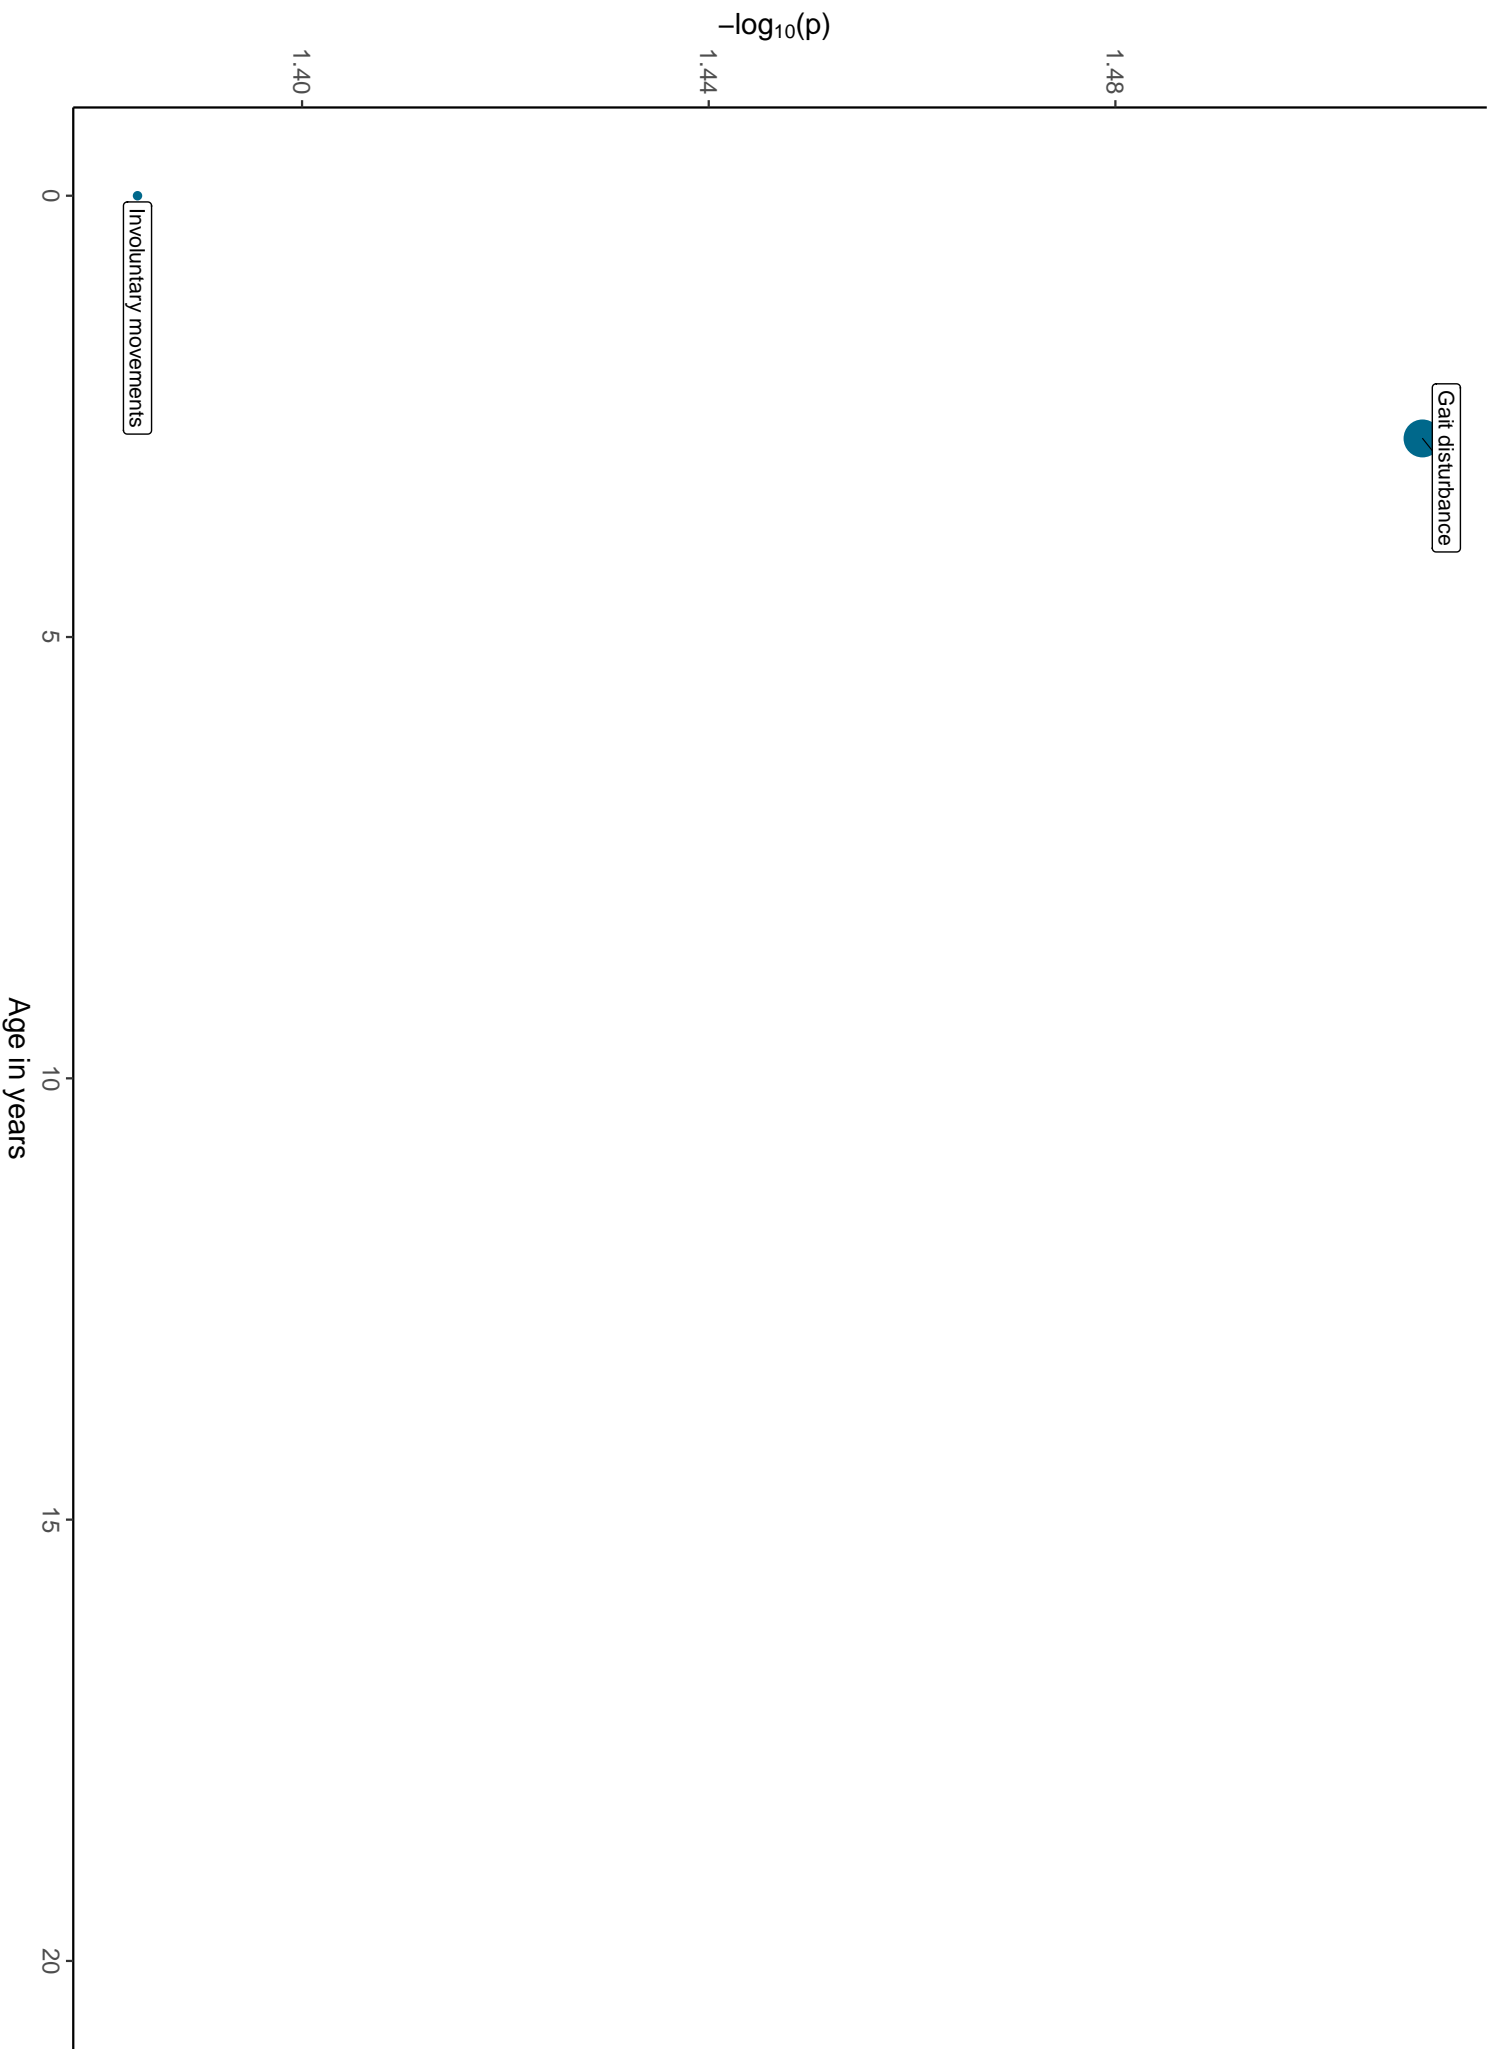

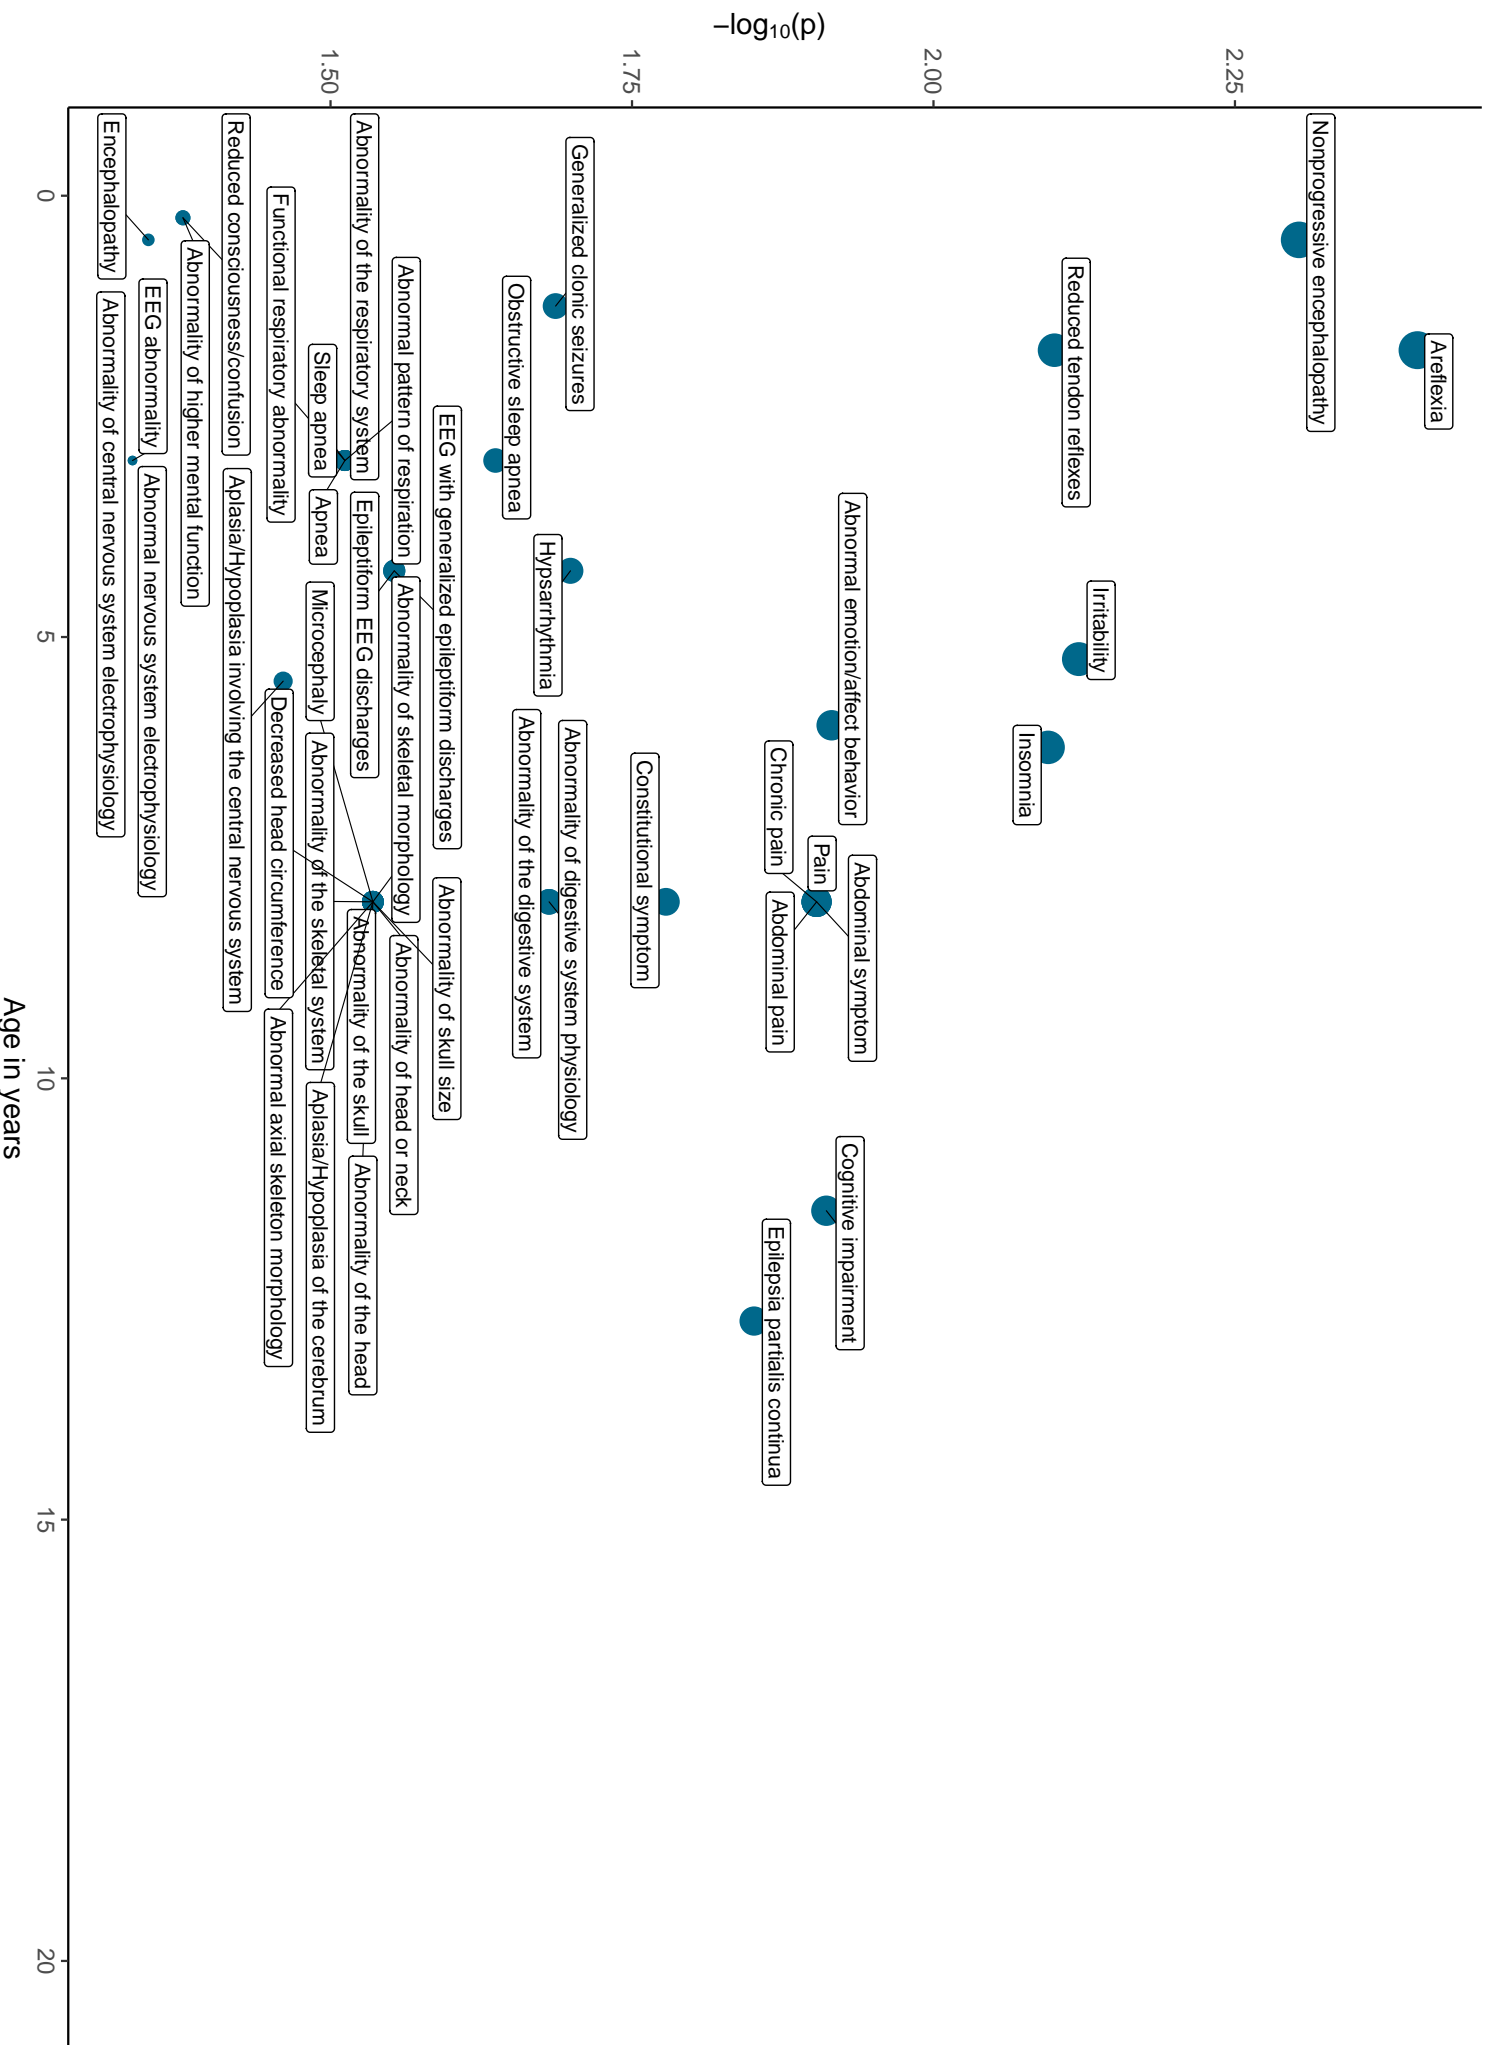

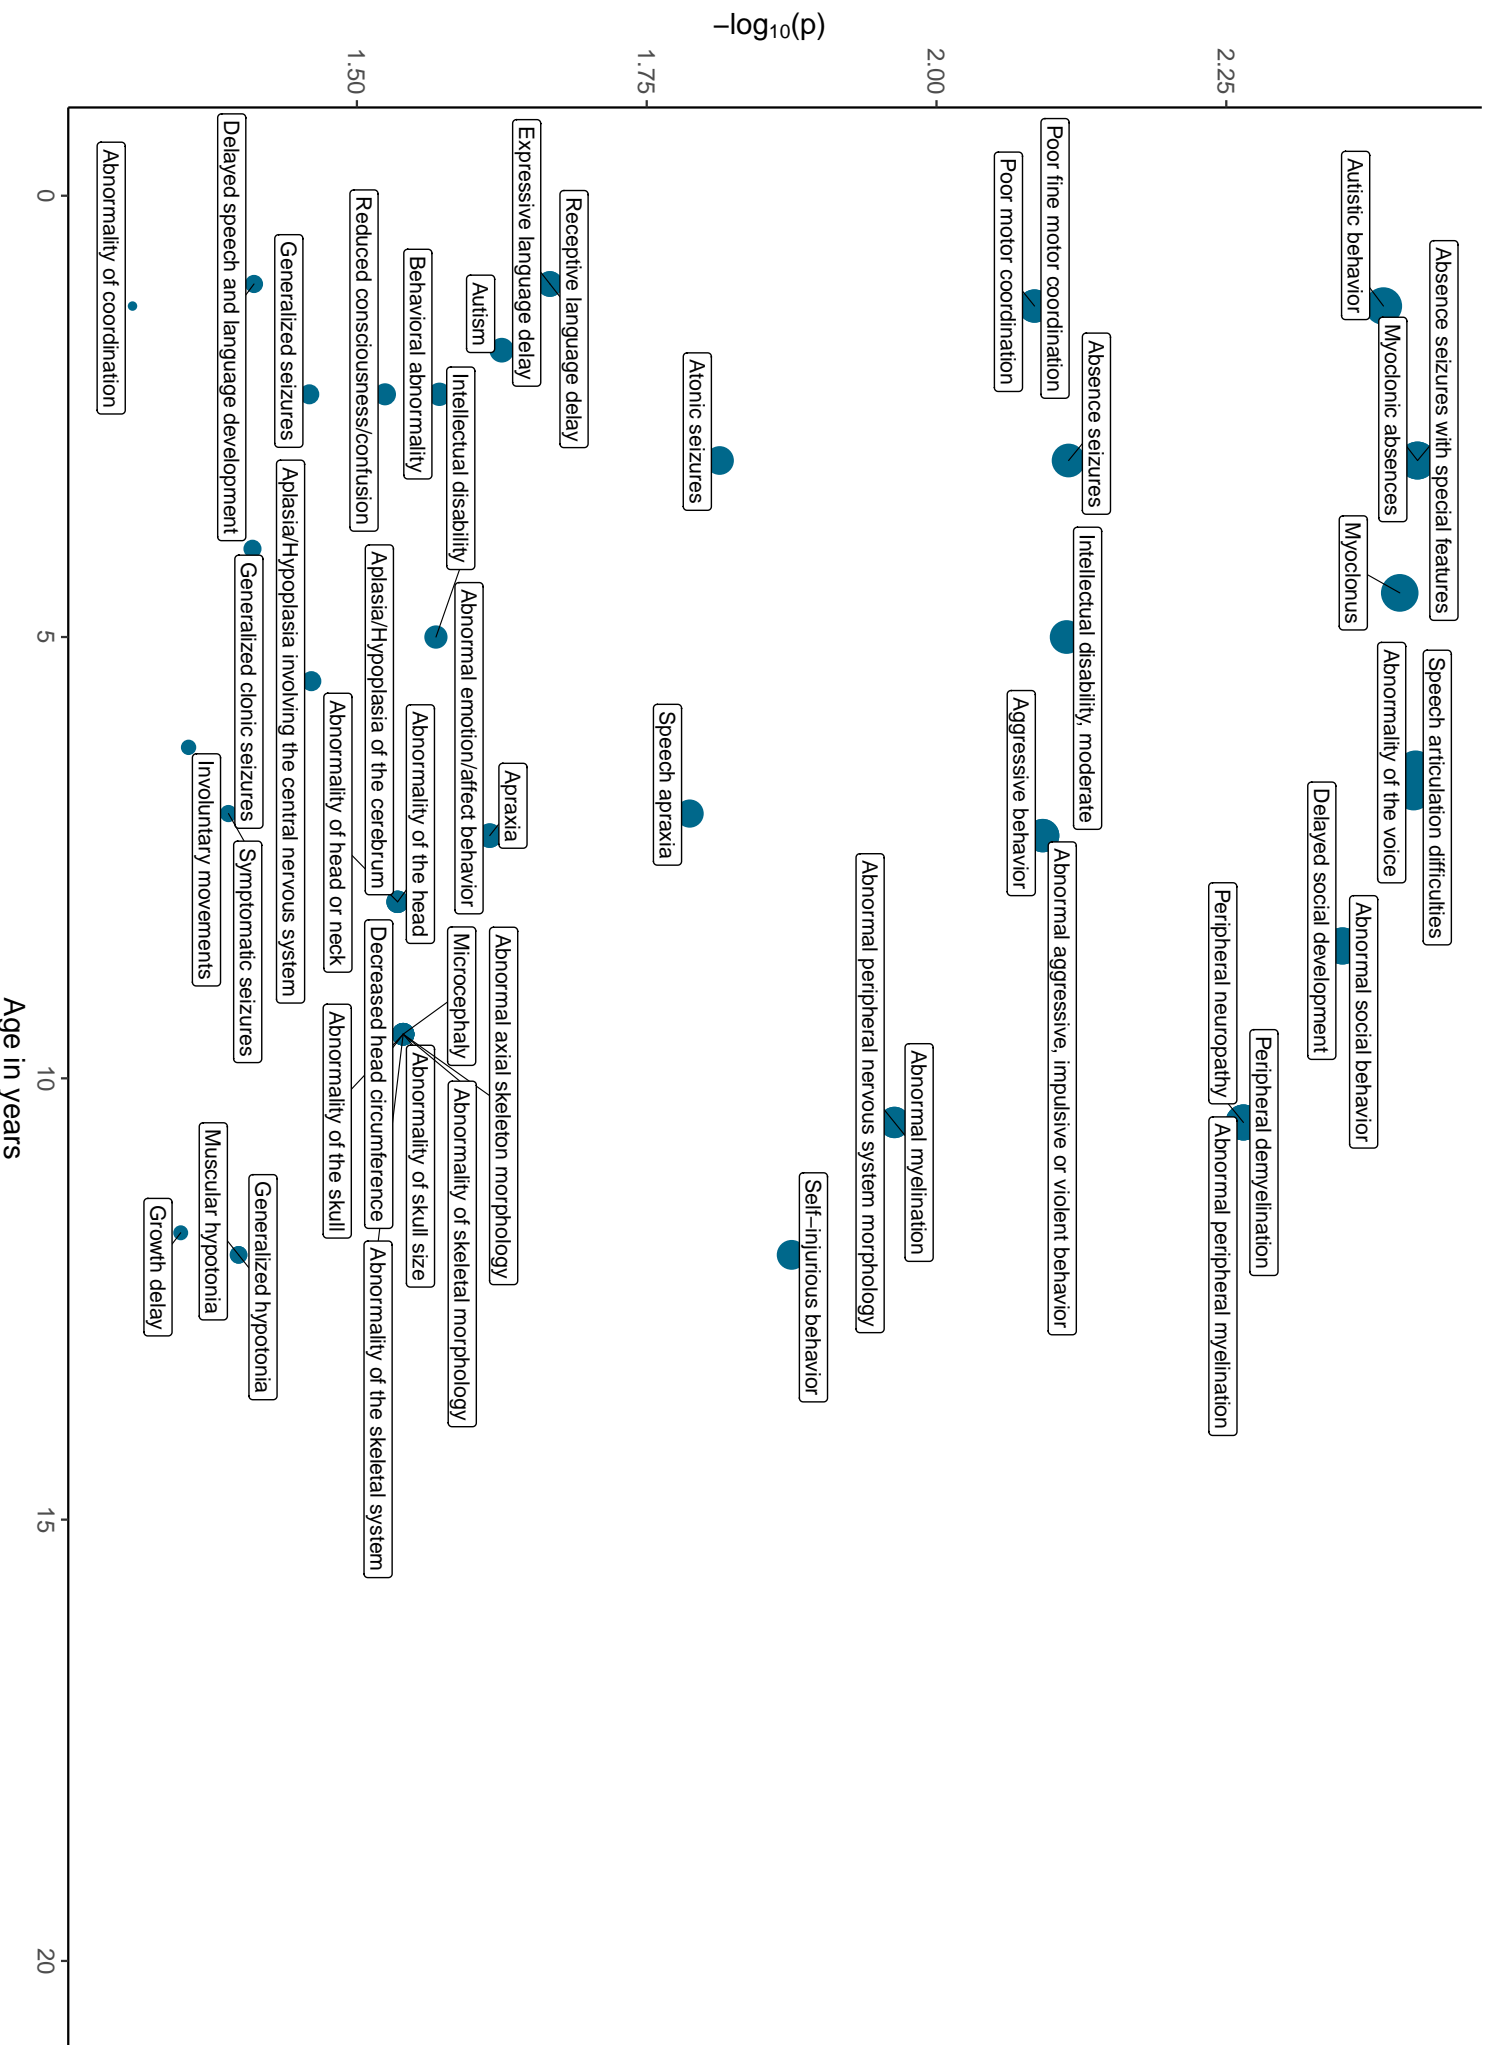

*HPO terms associated with SZT2*

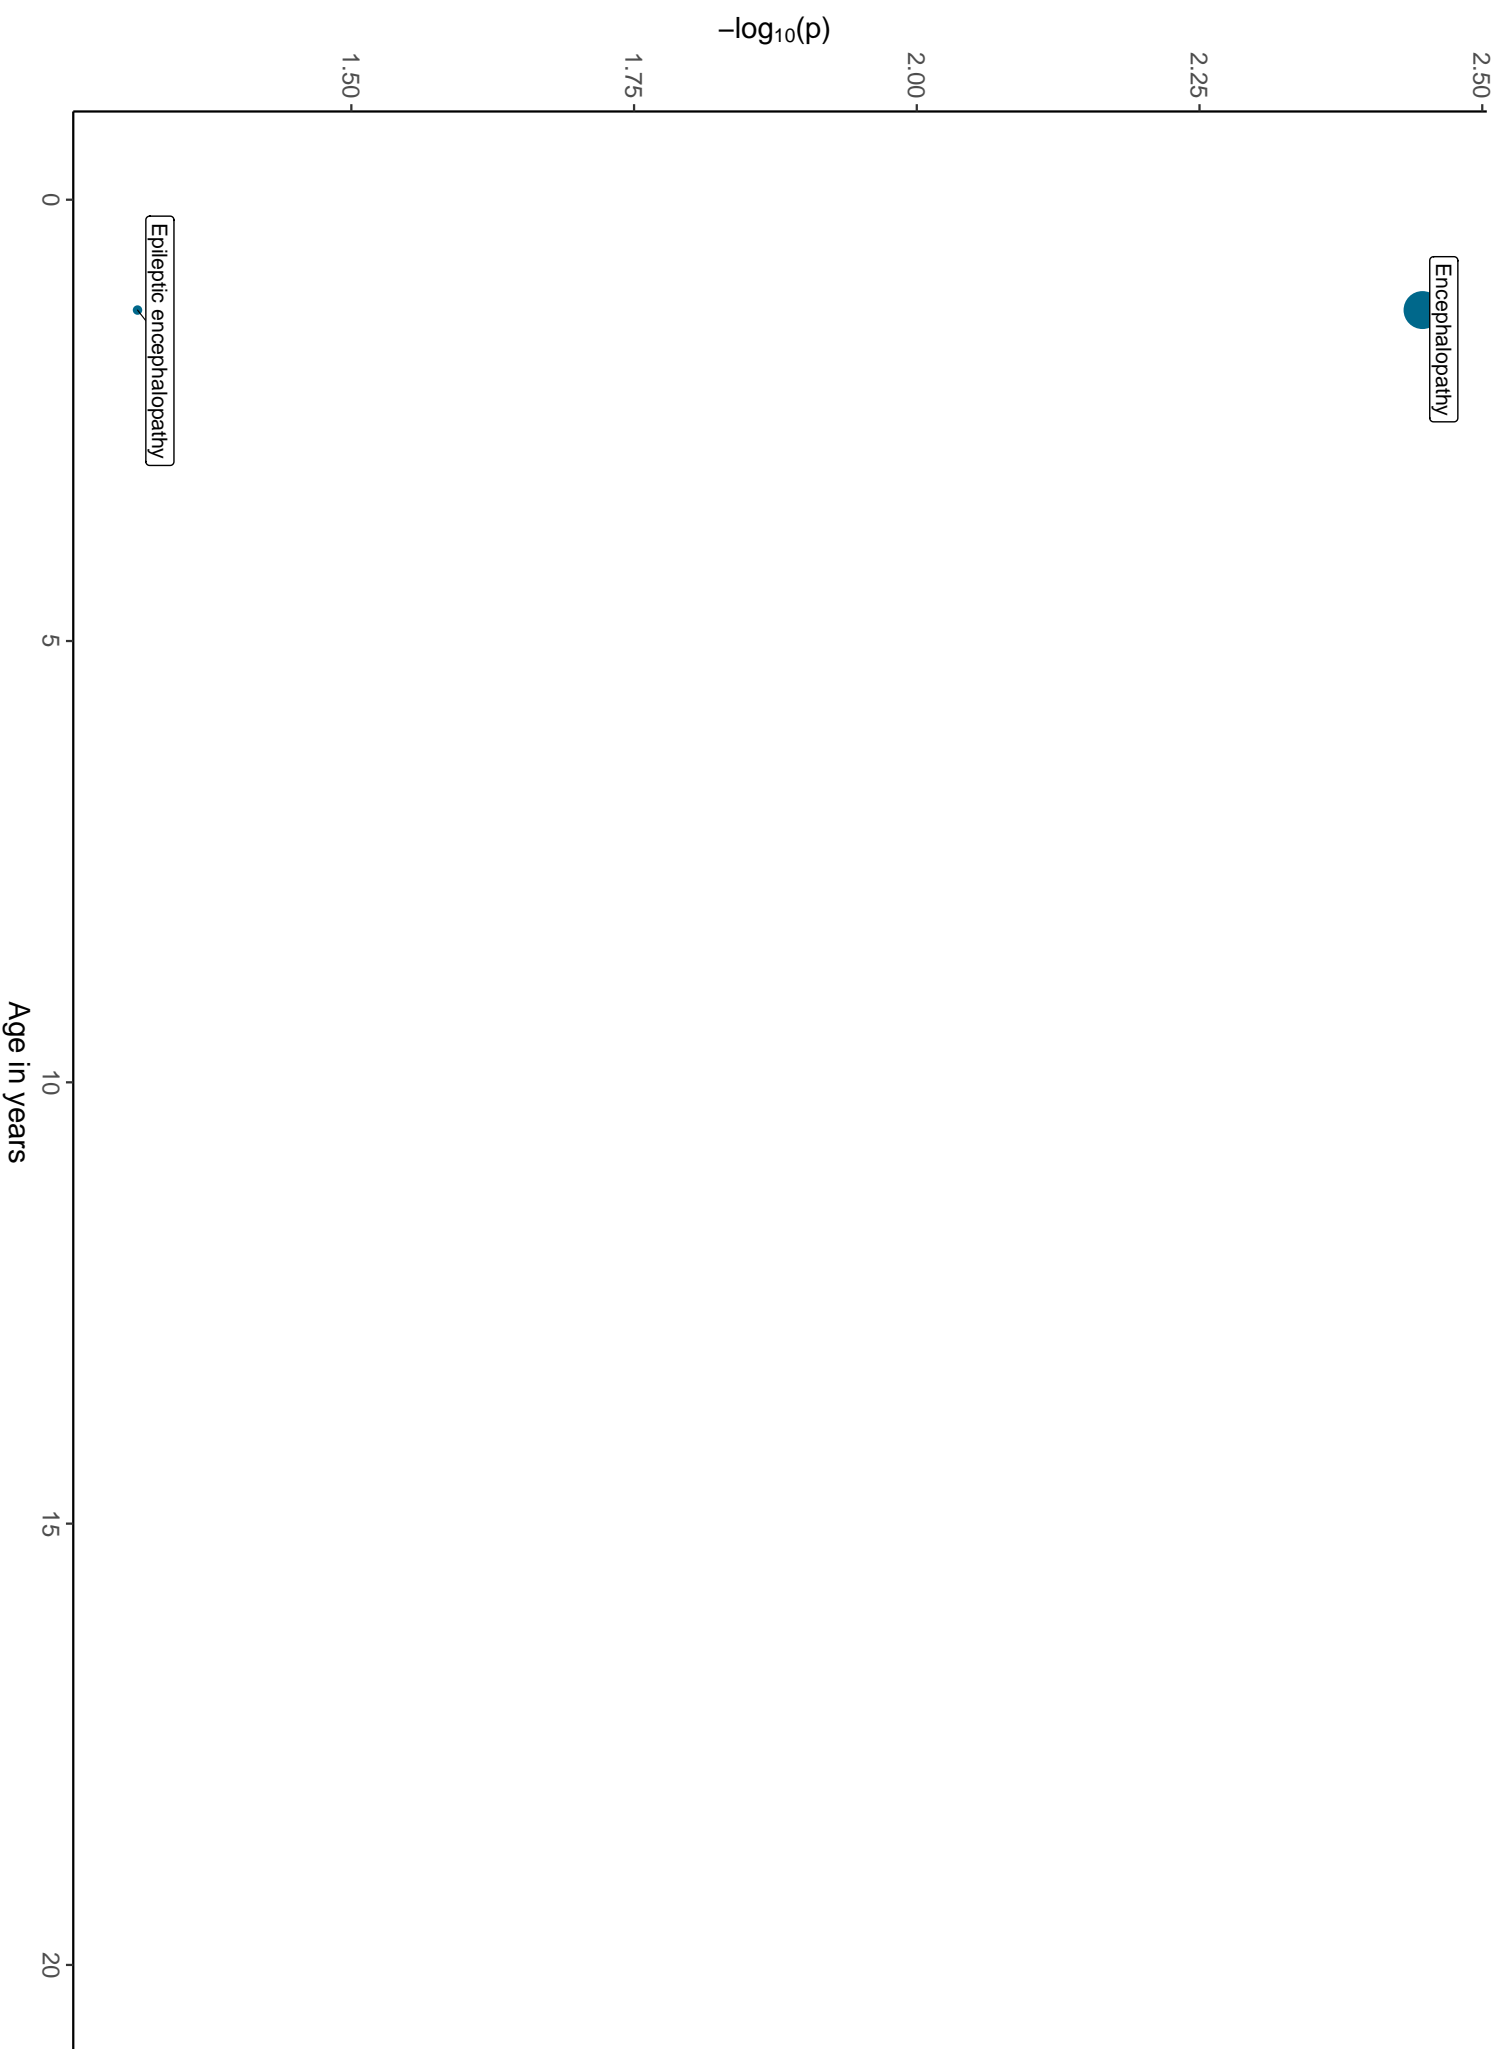

HPO terms associated with TBC1D24

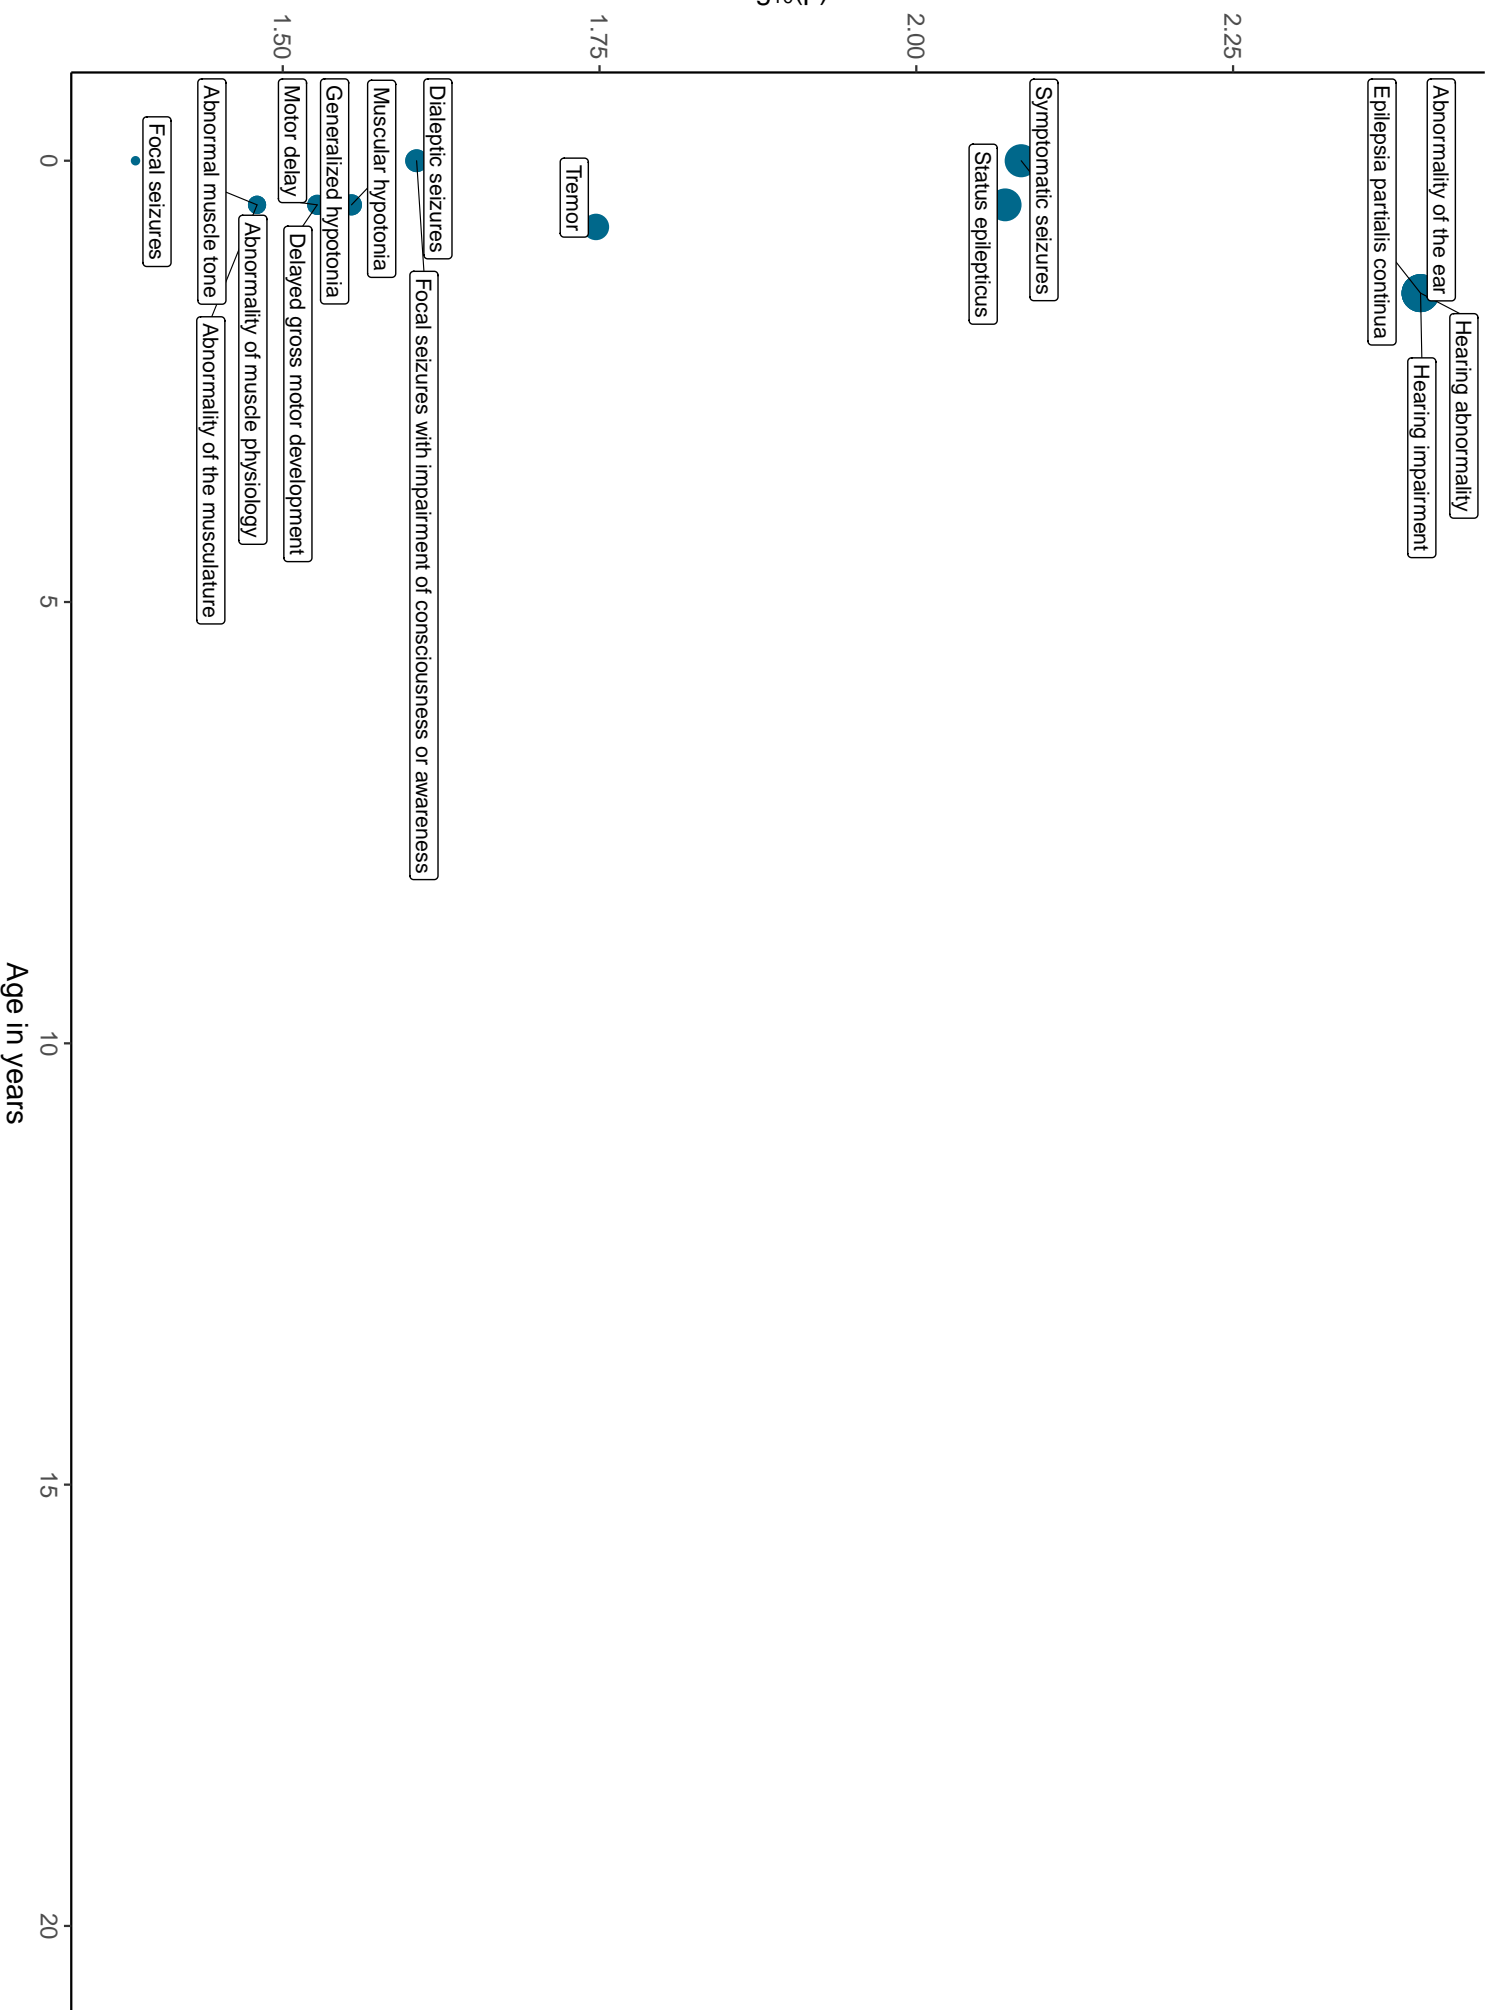

HPO terms associated with WDR45

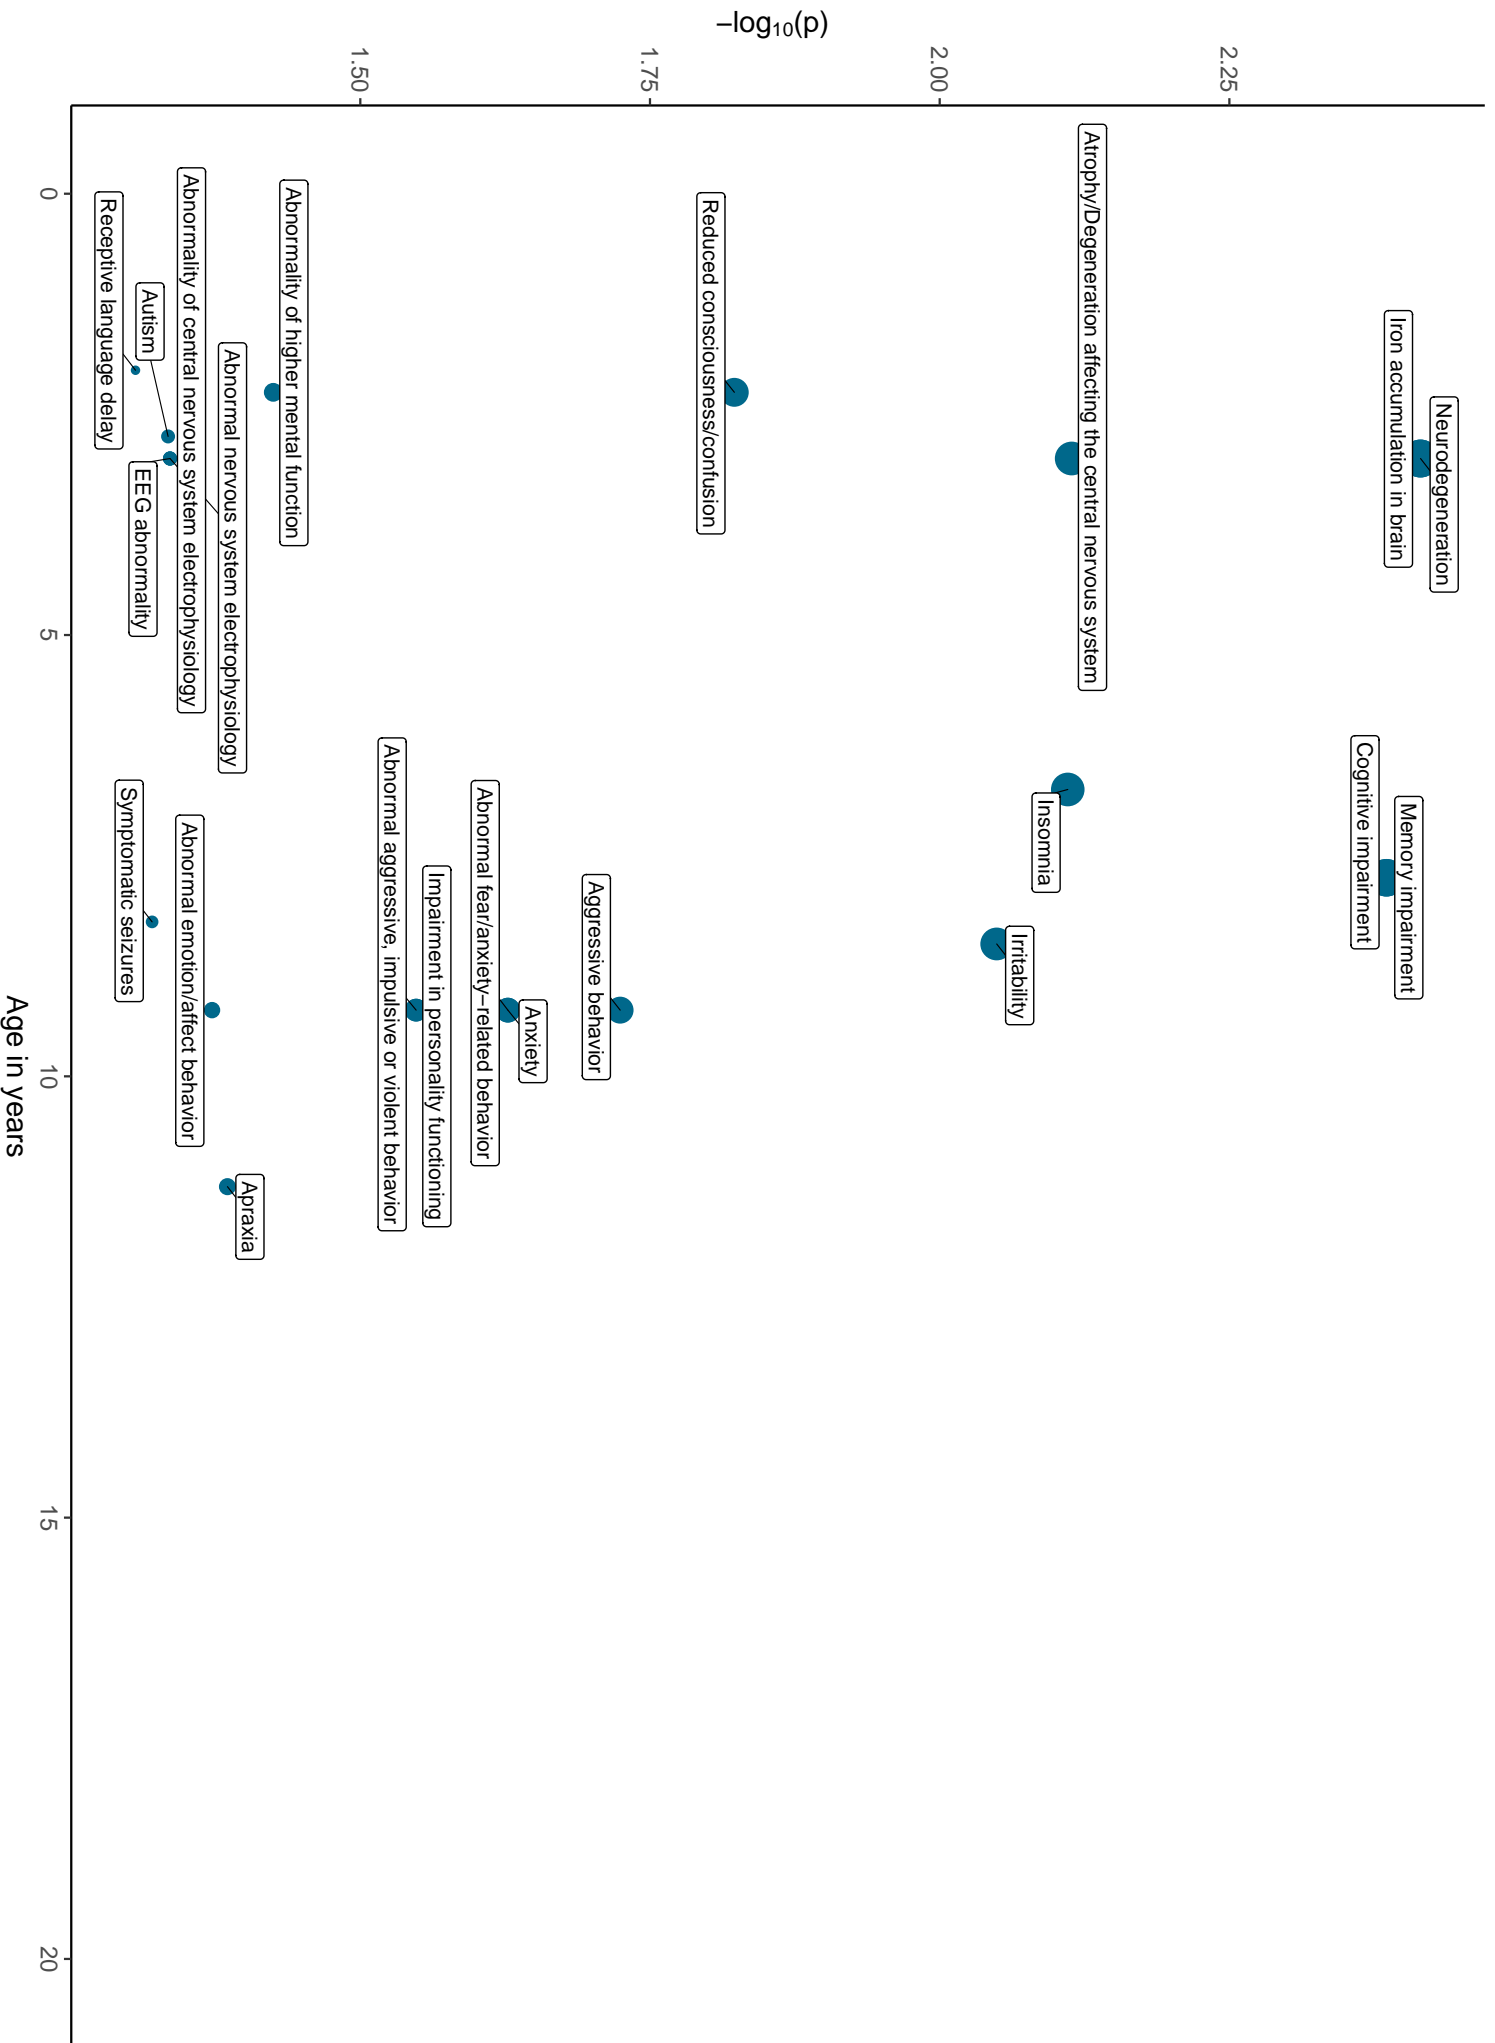

Supplement: 41436_2020_923_MOESM1_ESM.pdf [file 41436_2020_923_MOESM1_ESM.pdf]
